# Supplementary material for: Kinase-dead ATM protein is highly oncogenic and can be preferentially targeted by Topo-isomerase I inhibitors
Source: eLife. 2016 Jun 15;5:e14709. doi: 10.7554/eLife.14709 (PMC4957979; doi:10.7554/eLife.14709)
Supplement: Supplementary file 1. — At the time of primary analyses, 2 TCGA cancer cases (1 and 2 in the table below) have mutations involving N2875 of human ATM. Among them, the first case also has 'shallow del' in ATM region, consistent with Mut/- genotype. Since then, one additional prostate cancer (case 3) was reported to have N2875S mutations. While ATM region deemed 'diploid', the allele frequency of the N2875S allele is 0.92 (92% of the reads in this region are mutated), consistent with phenotypically - homozygous status. 1) TCGA-EW-A1J6-01 breast cancer N2875S shallow del; 2) TCGA-G9-7521-01 prostate cancer N2875K diploid; 3) TCGA-YL-A8S9-01 prostate cancer N2875S diploid; allele freq = 0.92. DOI: http://dx.doi.org/10.7554/eLife.14709.018 [file elife-14709-supp1.xlsx]

## Sheet: Supplementary Information 1A
Supplementary Table 1: Detailed list and annotation of germline mutations in ATM from Ataxia Telangiectasia patients.
variance_ID	Hugo_Symbol	Reference	protein_change	cDNA_change	Protein_position	Effect	Mutation_Type	Annotation
ATM_00007	ATM	Castellvi-Bel et al. 1999	p.(Ser49Cys)	c.146C>G	49	Missense	Common_SNP	dbSNPrs1800054. CEU allele frequency > 1% in Exome Sequencing Project
ATM_00007	ATM	Becker-Catania et al. 2000	p.(Ser49Cys)	c.146C>G	49	Missense	Common_SNP	dbSNPrs1800054. CEU allele frequency > 1% in Exome Sequencing Project
ATM_00143	ATM	Castellvi-Bel et al. 1999	p.(Phe858Leu)	c.2572T>C	858	Missense	Common_SNP	dbSNPrs1800056. CEU allele frequency > 1% in Exome Sequencing Project
ATM_00001	ATM	Gilad et al. 1996b	p.(0?)	c.?	10	Truncating	Large_DEL	exons 4 and 5 deleted in cDNA
ATM_00001	ATM	Gilad et al. 1996b	p.0?	c.?	10	Truncating	Large_DEL	exons 4 and 5 deleted in cDNA
ATM_00002	ATM	Stankovic 1998	p.(Met1Thr)	c.2T>C	1	Truncating	Start_Codon	-
ATM_00002	ATM	Byrd et al. 1996,_x001A__x001A_Stankovic 1998	p.(Met1Thr)	c.2T>C	1	Truncating	Start_Codon	-
ATM_00002	ATM	Gilad et al. 1996b	p.(Met1)	c.2T>C	1	Truncating	Start_Codon	-
ATM_00002	ATM	Buzin et al 2003	p.(Met1Thr)	c.2T>C	1	Truncating	Start_Codon	-
ATM_00003	ATM	Sandoval 1999	p.(Leu9fs)	c.27_27delT	9	Truncating	Frame_Shift_Del	-
ATM_00003	ATM	Sandoval 1999	p.(Leu9fs)	c.27_27delT	9	Truncating	Frame_Shift_Del	-
ATM_00005	ATM	Mitui et al. 2003	p.(Arg35*)	c.103C>T	35	Truncating	Nonsense_Mutation	-
ATM_00005	ATM	Teraoka et al. 1999,Becker-Catania et al. 2000	p.(Arg35*)	c.103C>T	35	Truncating	Nonsense_Mutation	-
ATM_00005	ATM	Gilad et al. 1998	p.(Arg35*)	c.103C>T	35	Truncating	Nonsense_Mutation	-
ATM_00005	ATM	Gilad et al. 1998	p.(Arg35*)	c.103C>T	35	Truncating	Nonsense_Mutation	-
ATM_00005	ATM	Gilad et al. 1998	p.(Arg35*)	c.103C>T	35	Truncating	Nonsense_Mutation	-
ATM_00005	ATM	Gilad et al. 1998	p.(Arg35*)	c.103C>T	35	Truncating	Nonsense_Mutation	-
ATM_00005	ATM	Gilad et al. 1996a	p.(Arg35*)	c.103C>T	35	Truncating	Nonsense_Mutation	-
ATM_00005	ATM	Gilad et al. 1996a	p.(Arg35*)	c.103C>T	35	Truncating	Nonsense_Mutation	-
ATM_00005	ATM	Mitui et al. 2003	p.(Arg35*)	c.103C>T	35	Truncating	Nonsense_Mutation	-
ATM_00006	ATM	Stankovic 1998	p.(His46fs)	c.137_140del4	46	Truncating	Frame_Shift_Del	-
ATM_00008	ATM	Li and Swift, 2000	p.(Trp57*)	c.170G>A	57	Truncating	Nonsense_Mutation	-
ATM_00008	ATM	Li and Swift, 2000	p.(Trp57*)	c.170G>A	57	Truncating	Nonsense_Mutation	-
ATM_00009	ATM	Stankovic 1998	p.(Phe63fs)	c.?	63	Truncating	Frame_Shift_Ins	exon 6 deleted in cDNA
ATM_00009	ATM	Gilad et al. 1996b	p.(Glu166fs)	c.?	166	Truncating	Frame_Shift_Ins	genomic deletion removing exons 8-56
ATM_00009	ATM	Gilad et al. 1996b	p.(Glu166fs)	c.?	166	Truncating	Frame_Shift_Ins	genomic deletion removing exons 8-56
ATM_00009	ATM	Gilad et al. 1996b	p.(Glu709_Lys750del42)	c.?	709	Truncating	Frame_Shift_Ins	exon 16 deleted in cDNA
ATM_00009	ATM	Gilad et al. 1996b	p.(Glu709_Lys750del42)	c.?	709	Truncating	Frame_Shift_Ins	exon 16 deleted in cDNA
ATM_00009	ATM	Ejima & Sasaki, 1998	p.(Glu709_Lys750del42)	c.?	709	Truncating	Frame_Shift_Ins	exon 16 deleted in cDNA
ATM_00009	ATM	Gilad et al. 1996b	p.(Leu2544_Glu2596del)	c.?	2544	Truncating	Frame_Shift_Ins	exon 54 deletion in cDNA
ATM_00009	ATM	Wright et al. 1996	p.(Leu2544_Glu2596del)	c.?	2544	Truncating	Frame_Shift_Ins	exon 54 deleted in cDNA
ATM_00009	ATM	Stankovic 1998	p.(Leu2544_Glu2596del)	c.?	2544	Truncating	Frame_Shift_Ins	exon 54 deleted in cDNA
ATM_00009	ATM	Telatar et al. 1996	p.(Leu2544_Glu2596del)	c.?	2544	Truncating	Frame_Shift_Ins	exon 54 deleted in cDNA
ATM_00009	ATM	Gilad et al. 1996b	p.(Leu2544_Glu2596del)	c.?	2544	Truncating	Frame_Shift_Ins	exon 54 deleted in cDNA
ATM_00009	ATM	Baumer et al. 1996	p.(Leu2544_Glu2596del)	c.?	2544	Truncating	Frame_Shift_Ins	exon 54 deleted in cDNA
ATM_00009	ATM	Stankovic 1998	p.(Leu2544_Glu2596del)	c.?	2544	Truncating	Frame_Shift_Ins	exon 54 deleted in cDNA
ATM_00010	ATM	Li and Swift, 2000	p.(Glu73fs)	c.216_217delAG	73	Truncating	Frame_Shift_Del	-
ATM_00011	ATM	Li and Swift, 2000	p.(Leu100*)	c.299T>A	100	Truncating	Nonsense_Mutation	-
ATM_00012	ATM	Laake et al. 2000	p.(Arg111_Glu166delinsLys)	c.332-1G>A	111	Truncating	Large_DEL	exon 7 deleted in cDNA
ATM_00013	ATM	Li and Swift, 2000	p.(Tyr123fs)	c.368_368delA	123	Truncating	Frame_Shift_Del	-
ATM_00014	ATM	Li and Swift, 2000	p.(Ile124fs)	c.370_374delATCAT	124	Truncating	Frame_Shift_Del	-
ATM_00015	ATM	Teraoka et al. 1999,_x001A__x001A_Mitui et al. 2005	p.(Val128*)	c.381_381delA	128	Truncating	Frame_Shift_Del	-
ATM_00015	ATM	Mitui et al. 2005	p.(Val128*)	c.381_381delA	128	Truncating	Frame_Shift_Del	-
ATM_00015	ATM	Babaei et al. 2005	p.(Val128*)	c.381_381delA	128	Truncating	Frame_Shift_Del	-
ATM_00015	ATM	Babaei et al. 2005	p.(Val128*)	c.381_381delA	128	Truncating	Frame_Shift_Del	-
ATM_00015	ATM	Mitui et al. 2005	p.(Val128*)	c.381_381delA	128	Truncating	Frame_Shift_Del	-
ATM_00015	ATM	Castellvi-Bel et al. 1999	p.(Val128*)	c.381_381delA	128	Truncating	Frame_Shift_Del	-
ATM_00016	ATM	Telatar et al. 1998	p.(Leu145fs)	c.432_433insA	145	Truncating	Frame_Shift_Ins	-
ATM_00016	ATM	Teraoka et al. 1999,_x001A__x001A_Mitui et al. 2005	p.(Leu145fs)	c.432_433insA	145	Truncating	Frame_Shift_Ins	-
ATM_00017	ATM	Izatt et al. 1999	p.(Gln161fs)	c.480_484delTCAGC	161	Truncating	Frame_Shift_Del	-
ATM_00018	ATM	Ejima and Sasaki, 1998	p.(Gln162*)	c.484C>T	162	Truncating	Nonsense_Mutation	deletion exon 7 confirmed in cDNA
ATM_00018	ATM	Netherlands:Amsterdam	p.(Gln162*)	c.484C>T	162	Truncating	Nonsense_Mutation	deletion exon 7 confirmed in cDNA
ATM_00019	ATM	Laake et al. 2000	p.(Gln163*)	c.487C>T	163	Truncating	Nonsense_Mutation	-
ATM_00021	ATM	Byrd et al. 1996	p.(Glu166fs)	c.?	166	Truncating	Frame_Shift_Ins	exon 8 deleted in cDNA
ATM_00022	ATM	Sandoval 1999	p.(Tyr171*)	c.513T>G	171	Truncating	Nonsense_Mutation	Reference sequence has "C" rather than "T" at position 513
ATM_00022	ATM	Sandoval 1999	p.(Tyr171*)	c.513T>G	171	Truncating	Nonsense_Mutation	Reference sequence has "C" rather than "T" at position 513
ATM_00023	ATM	Li and Swift, 2000	p.(Cys199*)	c.597T>A	199	Truncating	Nonsense_Mutation	-
ATM_00024	ATM	Laake et al. 2000	p.(Glu166fs)	c.662G>T	166	Truncating	Frame_Shift_Ins	exon 8 deleted in cDNA
ATM_00025	ATM	Byrd et al. 1996,_x001A__x001A_Stankovic 1998	p.(Ser214Profs*16)	c.640_640delT	2141	Truncating	Frame_Shift_Del	-
ATM_00025	ATM	Coutinho et al. 2004	p.(Ser214Profs*16)	c.640_640delT	2141	Truncating	Frame_Shift_Del	-
ATM_00025	ATM	Coutinho et al. 2004	p.(Ser214Profs*16)	c.640_640delT	2141	Truncating	Frame_Shift_Del	-
ATM_00025	ATM	Mitui et al. 2003	p.(Ser214Profs*16)	c.640_640delT	2141	Truncating	Frame_Shift_Del	-
ATM_00025	ATM	Demuth et al. 2011	p.(Ser214Profs*16)	c.640_640delT	2141	Truncating	Frame_Shift_Del	-
ATM_00026	ATM	Castellvi-Bel et al. 1999	p.(Gln222fs)	c.663-3_663-2delCA	222	Truncating	Frame_Shift_Del	-
ATM_00028	ATM	Broeks et al. 1998	p.(Arg248fs)	c.741_741delT	248	Truncating	Frame_Shift_Del	-
ATM_00029	ATM	Teraoka et al. 1999,_x001A__x001A_Buzin et al. 2003	p.(Arg221*)	c.748C>T	221	Truncating	Nonsense_Mutation	-
ATM_00029	ATM	United States:Los Angeles	p.(Arg221*)	c.748C>T	221	Truncating	Nonsense_Mutation	-
ATM_00030	ATM	Gilad et al. 1996b	p.(Cys252*)	c.755_756delGT	252	Truncating	Frame_Shift_Del	-
ATM_00030	ATM	Gilad et al. 1996b	p.(Cys252*)	c.755_756delGT	252	Truncating	Frame_Shift_Del	-
ATM_00031	ATM	Sandoval 1999	p.(Tyr264fs)	c.790_790delT	264	Truncating	Frame_Shift_Del	-
ATM_00031	ATM	Li and Swift, 2000	p.(Tyr264fs)	c.790_790delT	264	Truncating	Frame_Shift_Del	-
ATM_00031	ATM	Mitui et al. 2003	p.(Tyr264fs)	c.790_790delT	264	Truncating	Frame_Shift_Del	-
ATM_00031	ATM	Buzin et al. 2003	p.(Tyr264fs)	c.790_790delT	264	Truncating	Frame_Shift_Del	-
ATM_00031	ATM	Verhagen et al. 2011,Netherlands:Amsterdam	p.(Tyr264fs)	c.790_790delT	264	Truncating	Frame_Shift_Del	-
ATM_00032	ATM	Stankovic 1998	p.(Ile265fs)	c.794_795ins4	265	Truncating	Frame_Shift_Ins	-
ATM_00033	ATM	Teraoka et al. 1999	p.(Gln268*)	c.802C>T	268	Truncating	Nonsense_Mutation	-
ATM_00034	ATM	Sandoval 1999	p.(Leu275*)	c.824_824delT	275	Truncating	Frame_Shift_Del	-
ATM_00034	ATM	Sandoval 1999	p.(Leu275*)	c.824_824delT	275	Truncating	Frame_Shift_Del	-
ATM_00034	ATM	Stankovic 1998	p.(Leu275*)	c.824_824delT	275	Truncating	Frame_Shift_Del	-
ATM_00034	ATM	Sandoval 1999	p.(Leu275*)	c.824_824delT	275	Truncating	Frame_Shift_Del	-
ATM_00036	ATM	Laake et al. 2000	p.(Gln268fs)	c.901+2T>A	268	Truncating	Frame_Shift_Ins	exon 9 deleted in cDNA
ATM_00037	ATM	Laake et al. 2000	p.(Gln268fs)	c.901+3A>T	268	Truncating	Frame_Shift_Ins	exon 9 deleted in cDNA
ATM_00038	ATM	Teraoka et al. 1999	p.(Ala302fs)	c.902-1G>T	302	Truncating	Frame_Shift_Ins	exon 10 deleted in cDNA
ATM_00041	ATM	Teraoka et al. 1999,Becker-Catania et al. 2000	p.(Glu343Ilefs*2)	c.1027_1030delGAAA	343	Truncating	Frame_Shift_Del	-
ATM_00041	ATM	Li and Swift, 2000	p.(Glu343Ilefs*2)	c.1027_1030delGAAA	343	Truncating	Frame_Shift_Del	-
ATM_00041	ATM	Buzin et al. 2003	p.(Glu343Ilefs*2)	c.1027_1030delGAAA	343	Truncating	Frame_Shift_Del	-
ATM_00041	ATM	Castellvi-Bel et al. 1999	p.(Glu343Ilefs*2)	c.1027_1030delGAAA	343	Truncating	Frame_Shift_Del	-
ATM_00041	ATM	Verhagen et al. 2011	p.(Glu343Ilefs*2)	c.1027_1030delGAAA	343	Truncating	Frame_Shift_Del	-
ATM_00043	ATM	Li and Swift, 2000	p.(Cys353fs)	c.1055_1056insT	353	Truncating	Frame_Shift_Ins	-
ATM_00043	ATM	Li and Swift, 2000	p.(Cys353fs)	c.1055_1056insT	353	Truncating	Frame_Shift_Ins	-
ATM_00043	ATM	Li and Swift, 2000	p.(Cys353fs)	c.1055_1056insT	353	Truncating	Frame_Shift_Ins	-
ATM_00043	ATM	Li and Swift, 2000	p.(Cys353fs)	c.1055_1056insT	353	Truncating	Frame_Shift_Ins	-
ATM_00044	ATM	Teraoka et al. 1999	p.(Tyr370*)	c.1110_1110delC	370	Truncating	Frame_Shift_Del	-
ATM_00045	ATM	Castellvi-Bel et al. 1999	p.(Gln374*)	c.1120C>T	374	Truncating	Nonsense_Mutation	-
ATM_00046	ATM	Li and Swift, 2000	p.(Tyr380fs)	c.1139_1140ins4	380	Truncating	Frame_Shift_Ins	-
ATM_00046	ATM	Li and Swift, 2000	p.(Tyr380fs)	c.1139_1140ins4	380	Truncating	Frame_Shift_Ins	-
ATM_00047	ATM	Telatar et al. 1996,_x001A__x001A_Hacia et al. 1998	p.(Ser381fs)	c.1141_1142ins4	381	Truncating	Frame_Shift_Ins	-
ATM_00048	ATM	Izatt et al. 1999	p.(Lys387fs)	c.1158_1158delG	387	Truncating	Frame_Shift_Del	-
ATM_00049	ATM	Teraoka et al. 1999,_x001A__x001A_Buzin et al. 2003	p.(Trp393*)	c.1179_1180delGG	393	Truncating	Frame_Shift_Del	-
ATM_00050	ATM	Gilad et al. 1996b	p.(Gln414*)	c.1240C>T	414	Truncating	Nonsense_Mutation	-
ATM_00051	ATM	Saviozzi et al. 2002	p.(Asn2494fs)	c.7481_7482insA	2494	Truncating	Frame_Shift_Ins	-
ATM_00053	ATM	Laake et al. 2000	p.(Ala1052fs)	c.3284G>C	1052	Truncating	Frame_Shift_Ins	exon 24 deleted in cDNA
ATM_00054	ATM	Laake et al. 2000	p.(His1082fs)	c.3245_3247delATCinsTGAT	1082	Truncating	Frame_Shift_Del	-
ATM_00054	ATM	Laake et al. 2000	p.(His1082fs)	c.3245_3247delATCinsTGAT	1082	Truncating	Frame_Shift_Del	-
ATM_00054	ATM	Laake et al. 2000	p.(His1082fs)	c.3245_3247delATCinsTGAT	1082	Truncating	Frame_Shift_Del	-
ATM_00054	ATM	Laake et al. 2000	p.(His1082fs)	c.3245_3247delATCinsTGAT	1082	Truncating	Frame_Shift_Del	-
ATM_00054	ATM	Laake et al. 2000	p.(His1082fs)	c.3245_3247delATCinsTGAT	1082	Truncating	Frame_Shift_Del	-
ATM_00054	ATM	Laake et al. 2000	p.(His1082fs)	c.3245_3247delATCinsTGAT	1082	Truncating	Frame_Shift_Del	-
ATM_00054	ATM	Laake et al. 2000	p.(His1082fs)	c.3245_3247delATCinsTGAT	1082	Truncating	Frame_Shift_Del	-
ATM_00054	ATM	Laake et al. 2000	p.(His1082fs)	c.3245_3247delATCinsTGAT	1082	Truncating	Frame_Shift_Del	-
ATM_00054	ATM	Laake et al. 2000	p.(His1082fs)	c.3245_3247delATCinsTGAT	1082	Truncating	Frame_Shift_Del	-
ATM_00054	ATM	Laake et al. 2000	p.(His1082fs)	c.3245_3247delATCinsTGAT	1082	Truncating	Frame_Shift_Del	-
ATM_00054	ATM	Laake et al. 2000	p.(His1082fs)	c.3245_3247delATCinsTGAT	1082	Truncating	Frame_Shift_Del	-
ATM_00054	ATM	Laake et al. 2000	p.(His1082fs)	c.3245_3247delATCinsTGAT	1082	Truncating	Frame_Shift_Del	-
ATM_00054	ATM	Laake et al. 2000	p.(His1082fs)	c.3245_3247delATCinsTGAT	1082	Truncating	Frame_Shift_Del	-
ATM_00054	ATM	Laake et al. 2000	p.(His1082fs)	c.3245_3247delATCinsTGAT	1082	Truncating	Frame_Shift_Del	-
ATM_00054	ATM	Laake et al. 2000	p.(His1082fs)	c.3245_3247delATCinsTGAT	1082	Truncating	Frame_Shift_Del	-
ATM_00054	ATM	Laake et al. 2000	p.(His1082fs)	c.3245_3247delATCinsTGAT	1082	Truncating	Frame_Shift_Del	-
ATM_00054	ATM	Laake et al. 2000	p.(His1082fs)	c.3245_3247delATCinsTGAT	1082	Truncating	Frame_Shift_Del	-
ATM_00054	ATM	Li and Swift, 2000	p.(His1082fs)	c.3245_3247delATCinsTGAT	1082	Truncating	Frame_Shift_Del	-
ATM_00054	ATM	Li and Swift, 2000	p.(His1082fs)	c.3245_3247delATCinsTGAT	1082	Truncating	Frame_Shift_Del	-
ATM_00054	ATM	Li and Swift, 2000	p.(His1082fs)	c.3245_3247delATCinsTGAT	1082	Truncating	Frame_Shift_Del	-
ATM_00054	ATM	Telatar et al. 1998	p.(His1082fs)	c.3245_3247delATCinsTGAT	1082	Truncating	Frame_Shift_Del	-
ATM_00055	ATM	Laake et al. 2000	p.(Asn602_Cys633del32)	c.1898+3delAT	602	Truncating	LARGE_DEL	exon 14 deleted in cDNA
ATM_00056	ATM	Teraoka et al. 1999	p.(Glu709_Lys750del42)	c.2250G>A	709	Truncating	Large_DEL	-
ATM_00056	ATM	Sandoval 1999	p.(Glu709_Lys750del42)	c.2250G>A	709	Truncating	Large_DEL	-
ATM_00056	ATM	Byrd et al. 1996,_x001A__x001A_Stankovic 1998	p.(Glu709_Lys750del42)	c.2250G>A	709	Truncating	Large_DEL	-
ATM_00056	ATM	Sandoval 1999	p.(Glu709_Lys750del42)	c.2250G>A	709	Truncating	Large_DEL	-
ATM_00056	ATM	Cavalieri et al. 2006	p.(Glu709_Lys750del42)	c.2250G>A	709	Truncating	Large_DEL	Exon 16 deleted
ATM_00056	ATM	Cavalieri et al. 2006,Magliozzi et al. 2006	p.(Glu709_Lys750del42)	c.2250G>A	709	Truncating	Large_DEL	-
ATM_00056	ATM	Buzin et al. 2003	p.(Glu709_Lys750del42)	c.2250G>A	709	Truncating	Large_DEL	-
ATM_00056	ATM	Pagani et al. 2002	p.(Glu709_Lys750del42)	c.2250G>A	709	Truncating	Large_DEL	-
ATM_00056	ATM	Mitui et al. 2003	p.(Glu709_Lys750del42)	c.2250G>A	709	Truncating	Large_DEL	-
ATM_00056	ATM	Buzin et al. 2003	p.(Glu709_Lys750del42)	c.2250G>A	709	Truncating	Large_DEL	-
ATM_00056	ATM	Stankovic 1998	p.(Glu709_Lys750del42)	c.2250G>A	709	Truncating	Large_DEL	-
ATM_00056	ATM	Sandoval 1999	p.(Glu709_Lys750del42)	c.2250G>A	709	Truncating	Large_DEL	-
ATM_00056	ATM	Sandoval 1999	p.(Glu709_Lys750del42)	c.2250G>A	709	Truncating	Large_DEL	-
ATM_00056	ATM	Laake et al. 2000	p.(Glu709_Lys750del42)	c.2250G>A	709	Truncating	Large_DEL	-
ATM_00057	ATM	Laake et al. 2000	p.(Leu961fs)	c.2880_2880delC	961	Truncating	Frame_Shift_Del	-
ATM_00059	ATM	Laake et al. 2000	p.(Tyr1034*)	c.3102T>A	1034	Truncating	Nonsense_Mutation	-
ATM_00060	ATM	Laake et al. 2000	p.(Ala1052fs)	c.3154-2A>G	1052	Truncating	Frame_Shift_Ins	-
ATM_00061	ATM	Laake et al. 2000	p.(Arg3047*)	c.9139C>T	3047	Truncating	Nonsense_Mutation	-
ATM_00061	ATM	Izatt et al. 1999	p.(Arg3047*)	c.9139C>T	3047	Truncating	Nonsense_Mutation	-
ATM_00061	ATM	Toyoshima et al. 1998	p.(Arg3047*)	c.9139C>T	3047	Truncating	Nonsense_Mutation	-
ATM_00061	ATM	Gilad 1998	p.(Arg3047*)	c.9139C>T	3047	Truncating	Nonsense_Mutation	-
ATM_00061	ATM	Gilad 1998	p.(Arg3047*)	c.9139C>T	3047	Truncating	Nonsense_Mutation	-
ATM_00061	ATM	Laake et al. 2000	p.(Arg3047*)	c.9139C>T	3047	Truncating	Nonsense_Mutation	-
ATM_00061	ATM	Laake et al. 2000	p.(Arg3047*)	c.9139C>T	3047	Truncating	Nonsense_Mutation	-
ATM_00061	ATM	Stankovic et al. 1998	p.(Arg3047*)	c.9139C>T	3047	Truncating	Nonsense_Mutation	-
ATM_00061	ATM	Lakin et al. 1996	p.(Arg3047*)	c.9139C>T	3047	Truncating	Nonsense_Mutation	-
ATM_00062	ATM	Laake et al. 2000	p.(Val1292_Gln1331del40)	c.3993+1G>A	1292	Truncating	Large_DEL	-
ATM_00062	ATM	Laake et al. 2000	p.(Val1292_Gln1331del40)	c.3993+1G>A	1292	Truncating	Large_DEL	-
ATM_00062	ATM	Mitui et al. 2003	p.(Val1292_Gln1331del40)	c.3993+1G>A	1292	Truncating	Large_DEL	-
ATM_00063	ATM	Sandoval 1999	p.(Tyr1544*)	c.4632_4635delCTTA	1544	Truncating	Frame_Shift_Del	-
ATM_00063	ATM	Sandoval 1999	p.(Tyr1544*)	c.4632_4635delCTTA	1544	Truncating	Frame_Shift_Del	-
ATM_00063	ATM	Laake et al. 2000	p.(Tyr1544*)	c.4632_4635delCTTA	1544	Truncating	Frame_Shift_Del	-
ATM_00063	ATM	Laake et al. 2000	p.(Tyr1544*)	c.4632_4635delCTTA	1544	Truncating	Frame_Shift_Del	-
ATM_00063	ATM	Laake et al. 2000	p.(Tyr1544*)	c.4632_4635delCTTA	1544	Truncating	Frame_Shift_Del	-
ATM_00064	ATM	Laake et al. 2000	p.(Gln1620*)	c.4858C>T	1620	Truncating	Nonsense_Mutation	-
ATM_00064	ATM	Laake et al. 2000	p.(Gln1620*)	c.4858C>T	1620	Truncating	Nonsense_Mutation	-
ATM_00064	ATM	Vorechovsky et al. 1996c	p.(Gln1620*)	c.4858C>T	1620	Truncating	Nonsense_Mutation	-
ATM_00064	ATM	Vorechovsky et al. 1996c	p.(Gln1620*)	c.4858C>T	1620	Truncating	Nonsense_Mutation	-
ATM_00065	ATM	Laake et al. 2000	p.(Lys1773_Phe1774insValSer*)	c.5319+9A>G	1773	Truncating	Nonsense_Mutation	new splice site created in intron 37
ATM_00065	ATM	Laake et al. 2000	p.(Lys1773_Phe1774insValSer*)	c.5319+9A>G	1773	Truncating	Nonsense_Mutation	new splice site created in intron 37
ATM_00066	ATM	Laake et al. 2000	p.(Leu3010*)	c.9026T>G	3010	Truncating	Nonsense_Mutation	Published DNA and protein change inconsistent. Possibly c.9029T>G?
ATM_00067	ATM	Laake et al. 2000	p.(Arg2993Hisfs*4)	c.8978_8981delGAAAinsAT	2993	Truncating	Frame_Shift_Del	-
ATM_00068	ATM	Laake et al. 2000	p.(Gly2891fs)	c.8786+1G>A	2891	Truncating	Frame_Shift_Ins	-
ATM_00068	ATM	Laake et al. 2000	p.(Gly2891fs)	c.8786+1G>A	2891	Truncating	Frame_Shift_Ins	-
ATM_00068	ATM	Teraoka et al. 1999	p.(G2891fs)	c.8786+1G>A	2891	Truncating	Frame_Shift_Ins	-
ATM_00068	ATM	Stankovic 1998	p.(Gly2891fs)	c.8786+1G>A	2891	Truncating	Frame_Shift_Ins	-
ATM_00068	ATM	Wright et al. 1996	p.(Gly2891fs)	c.8786+1G>A	2891	Truncating	Frame_Shift_Ins	-
ATM_00068	ATM	Byrd et al. 1996,_x001A__x001A_Stankovic 1998	p.(Gly2891fs)	c.8786+1G>A	2891	Truncating	Frame_Shift_Ins	-
ATM_00068	ATM	Stankovic 1998	p.(G2891fs)	c.8786+1G>A	2891	Truncating	Frame_Shift_Ins	-
ATM_00068	ATM	Lakin et al. 1996,_x001A__x001A_Stankovic 1998	p.(Gly2891fs)	c.8786+1G>A	2891	Truncating	Frame_Shift_Ins	-
ATM_00068	ATM	Li and Swift, 2000	p.(Gly2891fs)	c.8786+1G>A	2891	Truncating	Frame_Shift_Ins	-
ATM_00068	ATM	Li and Swift, 2000	p.(Gly2891fs)	c.8786+1G>A	2891	Truncating	Frame_Shift_Ins	-
ATM_00068	ATM	Teraoka et al. 1999,_x001A__x001A_Buzin et al. 2003	p.(Gly2891fs)	c.8786+1G>A	2891	Truncating	Frame_Shift_Ins	-
ATM_00069	ATM	Laake et al. 2000	p.(Glu1776*)	c.5326G>T	1776	Truncating	Nonsense_Mutation	-
ATM_00070	ATM	Laake et al. 2000	p.(His1802fs)	c.5405_5406insA	1802	Truncating	Frame_Shift_Ins	-
ATM_00071	ATM	Laake et al. 2000	p.(Asn1937fs)	c.5809_5813delAATTA	1937	Truncating	Frame_Shift_Del	-
ATM_00072	ATM	Birrell et al. 2005	p.(Glu1978*)	c.5932G>T	1978	Truncating	Nonsense_Mutation	-
ATM_00072	ATM	Birrell et al. 2005	p.(Glu1978*)	c.5932G>T	1978	Truncating	Nonsense_Mutation	-
ATM_00072	ATM	Teraoka et al. 1999	p.(Glu1978*)	c.5932G>T	1978	Truncating	Nonsense_Mutation	-
ATM_00072	ATM	Teraoka et al. 1999	p.(Glu1978*)	c.5932G>T	1978	Truncating	Nonsense_Mutation	-
ATM_00072	ATM	Wright et al. 1996,_x001A__x001A_Hacia et al. 1998	p.(Glu1978*)	c.5932G>T	1978	Truncating	Nonsense_Mutation	-
ATM_00072	ATM	Laake et al. 2000	p.(Glu1978*)	c.5932G>T	1978	Truncating	Nonsense_Mutation	-
ATM_00072	ATM	Telatar et al. 1998	p.(Glu1978*)	c.5932G>T	1978	Truncating	Nonsense_Mutation	-
ATM_00072	ATM	Teraoka et al. 1999,_x001A__x001A_Mitui et al. 2005	p.(Glu1978*)	c.5932G>T	1978	Truncating	Nonsense_Mutation	-
ATM_00072	ATM	Teraoka et al. 1999,_x001A__x001A_Buzin et al. 2003	p.(Glu1978*)	c.5932G>T	1978	Truncating	Nonsense_Mutation	-
ATM_00072	ATM	Sandoval 1999	p.(Glu1978*)	c.5932G>T	1978	Truncating	Nonsense_Mutation	-
ATM_00072	ATM	Li and Swift, 2000	p.(Glu1978*)	c.5932G>T	1978	Truncating	Nonsense_Mutation	-
ATM_00072	ATM	Li and Swift, 2000	p.(Glu1978*)	c.5932G>T	1978	Truncating	Nonsense_Mutation	-
ATM_00072	ATM	Birrell et al. 2005	p.(Glu1978*)	c.5932G>T	1978	Truncating	Nonsense_Mutation	-
ATM_00072	ATM	Mitui et al. 2003	p.(Glu1978*)	c.5932G>T	1978	Truncating	Nonsense_Mutation	-
ATM_00072	ATM	Birrell et al. 2005	p.(Glu1978*)	c.5932G>T	1978	Truncating	Nonsense_Mutation	-
ATM_00072	ATM	Birrell et al. 2005	p.(Glu1978*)	c.5932G>T	1978	Truncating	Nonsense_Mutation	-
ATM_00072	ATM	Magliozzi et al. 2006, RNA-Gilad et al.1996	p.(Glu1978*)	c.5932G>T	1978	Truncating	Nonsense_Mutation	-
ATM_00072	ATM	Magliozzi et al. 2006	p.(Glu1978*)	c.5932G>T	1978	Truncating	Nonsense_Mutation	-
ATM_00072	ATM	Birrell et al. 2005	p.(Glu1978*)	c.5932G>T	1978	Truncating	Nonsense_Mutation	-
ATM_00072	ATM	Mitui et al. 2005	p.(Glu1978*)	c.5932G>T	1978	Truncating	Nonsense_Mutation	-
ATM_00072	ATM	Mitui et al. 2005	p.(Glu1978*)	c.5932G>T	1978	Truncating	Nonsense_Mutation	-
ATM_00072	ATM	Mitui et al. 2005	p.(Glu1978*)	c.5932G>T	1978	Truncating	Nonsense_Mutation	-
ATM_00072	ATM	Mitui et al. 2005	p.(Glu1978*)	c.5932G>T	1978	Truncating	Nonsense_Mutation	-
ATM_00072	ATM	Birrell et al. 2005	p.(Glu1978*)	c.5932G>T	1978	Truncating	Nonsense_Mutation	-
ATM_00072	ATM	Birrell et al. 2005	p.(Glu1978*)	c.5932G>T	1978	Truncating	Nonsense_Mutation	-
ATM_00072	ATM	Netherlands:Amsterdam	p.(Glu1978*)	c.5932G>T	1978	Truncating	Nonsense_Mutation	-
ATM_00073	ATM	Sandoval 1999	p.(Asp2003Thrfs*5)	c.6095G>A	2003	Truncating	Frame_Shift_Ins	-
ATM_00073	ATM	Laake et al. 2000	p.(Asp2003Thrfs*5)	c.6095G>A	2003	Truncating	Frame_Shift_Ins	-
ATM_00073	ATM	Li and Swift, 2000	p.(Asp2003Thrfs*5)	c.6095G>A	2003	Truncating	Frame_Shift_Ins	-
ATM_00073	ATM	Li and Swift, 2000	p.(Asp2003Thrfs*5)	c.6095G>A	2003	Truncating	Frame_Shift_Ins	-
ATM_00073	ATM	Li and Swift, 2000	p.(Asp2003Thrfs*5)	c.6095G>A	2003	Truncating	Frame_Shift_Ins	-
ATM_00073	ATM	Teraoka et al. 1999	p.(Asp2003Thrfs*5)	c.6095G>A	2003	Truncating	Frame_Shift_Ins	-
ATM_00073	ATM	Teraoka et al. 1999	p.(Asp2003Thrfs*5)	c.6095G>A	2003	Truncating	Frame_Shift_Ins	-
ATM_00073	ATM	Mitui et al. 2005	p.(Asp2003Thrfs*5)	c.6095G>A	2003	Truncating	Frame_Shift_Ins	-
ATM_00073	ATM	Mitui et al. 2005	p.(Asp2003Thrfs*5)	c.6095G>A	2003	Truncating	Frame_Shift_Ins	"aberrant splicing"
ATM_00073	ATM	Mitui et al. 2005	p.(Asp2003Thrfs*5)	c.6095G>A	2003	Truncating	Frame_Shift_Ins	-
ATM_00073	ATM	Mitui et al. 2005	p.(Asp2003Thrfs*5)	c.6095G>A	2003	Truncating	Frame_Shift_Ins	-
ATM_00073	ATM	Telatar et al. 1998	p.(Asp2003Thrfs*5)	c.6095G>A	2003	Truncating	Frame_Shift_Ins	-
ATM_00074	ATM	Laake et al. 2000	p.(Lys2237fs)	c.6710_6710delA	2237	Truncating	Frame_Shift_Del	-
ATM_00075	ATM	Laake et al. 2000	p.(Ile2260fs)	c.6779_6780delTA	2260	Truncating	Frame_Shift_Del	-
ATM_00076	ATM	Laake et al. 2000	p.(Arg2506_Asn2543del38)	c.7629_7629+4delTgtaa	2506	Truncating	LARGE_DEL	-
ATM_00077	ATM	Sandoval 1999	p.(Leu2544_Glu2596del)	c.7630-2A>C	2544	Truncating	Large_DEL	-
ATM_00077	ATM	Sandoval 1999	p.(Leu2544_Glu2596del)	c.7630-2A>C	2544	Truncating	Large_DEL	-
ATM_00077	ATM	Laake et al. 2000	p.(Leu2544_Glu2596del)	c.7630-2A>C	2544	Truncating	Large_DEL	-
ATM_00077	ATM	Teraoka et al. 1999	p.(Leu2544_Glu2596del)	c.7630-2A>C	2544	Truncating	Large_DEL	Exon 54 deletion
ATM_00077	ATM	Sandoval 1999	p.(Leu2544_Glu2596del)	c.7630-2A>C	2544	Truncating	Large_DEL	-
ATM_00077	ATM	Mitui et al. 2005	p.(Leu2544_Glu2596del)	c.7630-2A>C	2544	Truncating	Large_DEL	-
ATM_00077	ATM	Telatar et al. 1998	p.(Leu2544_Glu2596del)	c.7630-2A>C	2544	Truncating	Large_DEL	-
ATM_00077	ATM	Sandoval 1999	p.(Leu2544_Glu2596del)	c.7630-2A>C	2544	Truncating	Large_DEL	-
ATM_00077	ATM	Sandoval 1999	p.(Leu2544_Glu2596del)	c.7630-2A>C	2544	Truncating	Large_DEL	-
ATM_00077	ATM	Li and Swift, 2000	p.(Leu2544_Glu2596del)	c.7630-2A>C	2544	Truncating	Large_DEL	-
ATM_00077	ATM	Li and Swift, 2000	p.(Leu2544_Glu2596del)	c.7630-2A>C	2544	Truncating	Large_DEL	-
ATM_00077	ATM	Li and Swift, 2000	p.(Leu2544_Glu2596del)	c.7630-2A>C	2544	Truncating	Large_DEL	-
ATM_00077	ATM	Li and Swift, 2000	p.(Leu2544_Glu2596del)	c.7630-2A>C	2544	Truncating	Large_DEL	-
ATM_00077	ATM	Li and Swift, 2000	p.(Leu2544_Glu2596del)	c.7630-2A>C	2544	Truncating	Large_DEL	-
ATM_00077	ATM	Mitui et al. 2005	p.(Leu2544_Glu2596del)	c.7630-2A>C	2544	Truncating	Large_DEL	-
ATM_00077	ATM	Mitui et al. 2003	p.(Leu2544_Glu2596del)	c.7630-2A>C	2544	Truncating	Large_DEL	-
ATM_00077	ATM	Coutinho et al. 2004	p.(Leu2544_Glu2596del)	c.7630-2A>C	2544	Truncating	Large_DEL	-
ATM_00077	ATM	Mitui et al. 2005	p.(Leu2544_Glu2596del)	c.7630-2A>C	2544	Truncating	Large_DEL	exon 54 spliced out
ATM_00077	ATM	Mitui et al. 2005	p.(Leu2544_Glu2596del)	c.7630-2A>C	2544	Truncating	Large_DEL	exon 54 spliced out
ATM_00077	ATM	Mitui et al. 2005	p.(Leu2544_Glu2596del)	c.7630-2A>C	2544	Truncating	Large_DEL	-
ATM_00077	ATM	Mitui et al. 2005	p.(Leu2544_Glu2596del)	c.7630-2A>C	2544	Truncating	Large_DEL	-
ATM_00079	ATM	van Belzen et al. 1998	p.(Asp2625_Ala2626delinsGluPro)	c.7875_7876delTGinsGC	2625	Truncating	LARGE_DEL	-
ATM_00079	ATM	van Belzen et al. 1998	p.(Asp2625_Ala2626delinsGluPro)	c.7875_7876delTGinsGC	2625	Truncating	LARGE_DEL	-
ATM_00079	ATM	Laake et al. 2000	p.(Asp2625_Ala2626delinsGluPro)	c.7875_7876delTGinsGC	2625	Truncating	LARGE_DEL	-
ATM_00079	ATM	Li and Swift, 2000	p.(Asp2625_Ala2626delinsGluPro)	c.7875_7876delTGinsGC	2625	Truncating	LARGE_DEL	-
ATM_00079	ATM	Li and Swift, 2000	p.(Asp2625_Ala2626delinsGluPro)	c.7875_7876delTGinsGC	2625	Truncating	LARGE_DEL	-
ATM_00079	ATM	Dork et al. 2004	p.(Asp2625_Ala2626delinsGluPro)	c.7875_7876delTGinsGC	2625	Truncating	LARGE_DEL	-
ATM_00079	ATM	Netherlands:Amsterdam	p.(Asp2625_Ala2626delinsGluPro)	c.7875_7876delTGinsGC	2625	Truncating	LARGE_DEL	-
ATM_00079	ATM	Netherlands:Amsterdam	p.(Asp2625_Ala2626delinsGluPro)	c.7875_7876delTGinsGC	2625	Truncating	LARGE_DEL	-
ATM_00079	ATM	Netherlands:Amsterdam	p.(Asp2625_Ala2626delinsGluPro)	c.7875_7876delTGinsGC	2625	Truncating	LARGE_DEL	-
ATM_00080	ATM	Laake et al. 2000	p.(2718_2756del39)	c.8264_8268delATAAG	2718	Truncating	LARGE_DEL	-
ATM_00080	ATM	Laake et al. 2000	p.(2718_2756del39)	c.8264_8268delATAAG	2718	Truncating	LARGE_DEL	-
ATM_00080	ATM	Mitui et al. 2003	p.(2718_2756del39)	c.8264_8268delATAAG	2718	Truncating	LARGE_DEL	-
ATM_00080	ATM	Teraoka et al. 1999,_x001A__x001A_Mitui et al. 2003	p.(2718_2756del39)	c.8264_8268delATAAG	2718	Truncating	LARGE_DEL	-
ATM_00080	ATM	Mitui et al. 2003	p.(2718_2756del39)	c.8264_8268delATAAG	2718	Truncating	LARGE_DEL	-
ATM_00080	ATM	Coutinho et al. 2004	p.(2718_2756del39)	c.8264_8268delATAAG	2718	Truncating	LARGE_DEL	exon 58 spliced out
ATM_00080	ATM	Mitui et al. 2003	p.(2718_2756del39)	c.8264_8268delATAAG	2718	Truncating	LARGE_DEL	-
ATM_00080	ATM	Stankovic 1998	p.(2718_2756del39)	c.8264_8268delATAAG	2718	Truncating	LARGE_DEL	-
ATM_00081	ATM	Laake et al. 2000	p.(Lys2811fs)	c.8432_8432delA	2811	Truncating	Frame_Shift_Del	-
ATM_00081	ATM	Laake et al. 2000	p.(Lys2811fs)	c.8432_8432delA	2811	Truncating	Frame_Shift_Del	-
ATM_00081	ATM	Laake et al. 2000	p.(Lys2811fs)	c.8432_8432delA	2811	Truncating	Frame_Shift_Del	-
ATM_00081	ATM	Li and Swift, 2000	p.(Lys2811fs)	c.8432_8432delA	2811	Truncating	Frame_Shift_Del	-
ATM_00082	ATM	Laake et al. 2000	p.(2835_2839delCysMetGluLysPhe)	c.8504_8518del15	2835	Truncating	LARGE_DEL	-
ATM_00083	ATM	Laake et al. 2000	p.(His2887fs)	c.8656_8657insT	2887	Truncating	Frame_Shift_Ins	-
ATM_00083	ATM	Laake et al. 2000	p.(His2887fs)	c.8656_8657insT	2887	Truncating	Frame_Shift_Ins	-
ATM_00083	ATM	Laake et al. 2000	p.(His2887fs)	c.8656_8657insT	2887	Truncating	Frame_Shift_Ins	-
ATM_00083	ATM	Laake et al. 2000	p.(His2887fs)	c.8656_8657insT	2887	Truncating	Frame_Shift_Ins	-
ATM_00083	ATM	Li and Swift, 2000	p.(His2887fs)	c.8656_8657insT	2887	Truncating	Frame_Shift_Ins	-
ATM_00085	ATM	Broeks et al. 1998	p.(Lys468fs)	c.1402_1403delAA	468	Truncating	Frame_Shift_Del	-
ATM_00085	ATM	Li and Swift, 2000	p.(Lys468fs)	c.1402_1403delAA	468	Truncating	Frame_Shift_Del	-
ATM_00085	ATM	Li and Swift, 2000	p.(Lys468fs)	c.1402_1403delAA	468	Truncating	Frame_Shift_Del	-
ATM_00085	ATM	Buzin et al. 2003	p.(Lys468fs)	c.1402_1403delAA	468	Truncating	Frame_Shift_Del	-
ATM_00085	ATM	Buzin et al. 2003	p.(Lys468fs)	c.1402_1403delAA	468	Truncating	Frame_Shift_Del	-
ATM_00086	ATM	Broeks et al. 1998	p.(Glu522ILefs*21)	c.1563_1564delAG	522	Truncating	Frame_Shift_Del	-
ATM_00086	ATM	Telatar et al. 1996,Teraoka et al. 1999	p.(Glu522ILefs*21)	c.1563_1564delAG	522	Truncating	Frame_Shift_Del	-
ATM_00086	ATM	Broeks et al. 1998	p.(Glu522ILefs*21)	c.1563_1564delAG	522	Truncating	Frame_Shift_Del	-
ATM_00086	ATM	Teraoka et al. 1999	p.(Glu522ILefs*21)	c.1563_1564delAG	522	Truncating	Frame_Shift_Del	-
ATM_00086	ATM	Lakin et al. 1996,_x001A__x001A_Byrd et al. 1996	p.(Glu522ILefs*21)	c.1563_1564delAG	522	Truncating	Frame_Shift_Del	-
ATM_00086	ATM	Li and Swift, 2000	p.(Glu522ILefs*21)	c.1563_1564delAG	522	Truncating	Frame_Shift_Del	-
ATM_00086	ATM	Li and Swift, 2000	p.(Glu522ILefs*21)	c.1563_1564delAG	522	Truncating	Frame_Shift_Del	-
ATM_00086	ATM	Li and Swift, 2000	p.(Glu522ILefs*21)	c.1563_1564delAG	522	Truncating	Frame_Shift_Del	-
ATM_00086	ATM	Li and Swift, 2000	p.(Glu522ILefs*21)	c.1563_1564delAG	522	Truncating	Frame_Shift_Del	-
ATM_00086	ATM	Li and Swift, 2000	p.(Glu522ILefs*21)	c.1563_1564delAG	522	Truncating	Frame_Shift_Del	-
ATM_00086	ATM	Li and Swift, 2000	p.(Glu522ILefs*21)	c.1563_1564delAG	522	Truncating	Frame_Shift_Del	-
ATM_00086	ATM	Li and Swift, 2000	p.(Glu522ILefs*21)	c.1563_1564delAG	522	Truncating	Frame_Shift_Del	-
ATM_00086	ATM	Li and Swift, 2000	p.(Glu522ILefs*21)	c.1563_1564delAG	522	Truncating	Frame_Shift_Del	-
ATM_00086	ATM	Teraoka et al. 1999	p.(Glu522ILefs*21)	c.1563_1564delAG	522	Truncating	Frame_Shift_Del	-
ATM_00086	ATM	Teraoka et al. 1999	p.(Glu522ILefs*21)	c.1563_1564delAG	522	Truncating	Frame_Shift_Del	-
ATM_00086	ATM	Wright et al. 1996	p.(Glu522ILefs*21)	c.1563_1564delAG	522	Truncating	Frame_Shift_Del	-
ATM_00086	ATM	Wright et al. 1996	p.(Glu522ILefs*21)	c.1563_1564delAG	522	Truncating	Frame_Shift_Del	-
ATM_00086	ATM	Gilad et al. 1996b	p.(Glu522ILefs*21)	c.1563_1564delAG	522	Truncating	Frame_Shift_Del	-
ATM_00086	ATM	Gilad et al. 1996b	p.(Glu522ILefs*21)	c.1563_1564delAG	522	Truncating	Frame_Shift_Del	-
ATM_00086	ATM	Birrell et al. 2005	p.(Glu522ILefs*21)	c.1563_1564delAG	522	Truncating	Frame_Shift_Del	-
ATM_00086	ATM	Mitui et al. 2003	p.(Glu522ILefs*21)	c.1563_1564delAG	522	Truncating	Frame_Shift_Del	-
ATM_00086	ATM	Mitui et al. 2005	p.(Glu522ILefs*21)	c.1563_1564delAG	522	Truncating	Frame_Shift_Del	-
ATM_00086	ATM	Mitui et al. 2005	p.(Glu522ILefs*21)	c.1563_1564delAG	522	Truncating	Frame_Shift_Del	-
ATM_00086	ATM	Mitui et al. 2005	p.(Glu522ILefs*21)	c.1563_1564delAG	522	Truncating	Frame_Shift_Del	-
ATM_00086	ATM	Li and Swift, 2000	p.(Glu522ILefs*21)	c.1563_1564delAG	522	Truncating	Frame_Shift_Del	-
ATM_00086	ATM	Li and Swift, 2000	p.(Glu522ILefs*21)	c.1563_1564delAG	522	Truncating	Frame_Shift_Del	-
ATM_00086	ATM	Li and Swift, 2000	p.(Glu522ILefs*21)	c.1563_1564delAG	522	Truncating	Frame_Shift_Del	-
ATM_00086	ATM	Li and Swift, 2000	p.(Glu522ILefs*21)	c.1563_1564delAG	522	Truncating	Frame_Shift_Del	-
ATM_00086	ATM	Li and Swift, 2000	p.(Glu522ILefs*21)	c.1563_1564delAG	522	Truncating	Frame_Shift_Del	-
ATM_00086	ATM	Li and Swift, 2000	p.(Glu522ILefs*21)	c.1563_1564delAG	522	Truncating	Frame_Shift_Del	-
ATM_00086	ATM	Stankovic 1998	p.(Glu522ILefs*21)	c.1563_1564delAG	522	Truncating	Frame_Shift_Del	-
ATM_00086	ATM	Stankovic 1998	p.(Glu522ILefs*21)	c.1563_1564delAG	522	Truncating	Frame_Shift_Del	-
ATM_00086	ATM	Sandoval 1999	p.(Glu522ILefs*21)	c.1563_1564delAG	522	Truncating	Frame_Shift_Del	-
ATM_00086	ATM	Watters et al. 1997	p.(Glu522ILefs*21)	c.1563_1564delAG	522	Truncating	Frame_Shift_Del	-
ATM_00086	ATM	Verhagen et al. 2011,Netherlands:Amsterdam	p.(Glu522ILefs*21)	c.1563_1564delAG	522	Truncating	Frame_Shift_Del	-
ATM_00086	ATM	Verhagenet al. 2011,Netherlands:Amsterdam	p.(Glu522ILefs*21)	c.1563_1564delAG	522	Truncating	Frame_Shift_Del	-
ATM_00086	ATM	Verhagen et al. 2011,Netherlands:Amsterdam	p.(Glu522ILefs*21)	c.1563_1564delAG	522	Truncating	Frame_Shift_Del	-
ATM_00086	ATM	Netherlands:Amsterdam	p.(Glu522ILefs*21)	c.1563_1564delAG	522	Truncating	Frame_Shift_Del	-
ATM_00086	ATM	Demuth et al. 2011	p.(Glu522Ilefs*46)	c.1563_1564delAG	522	Truncating	Frame_Shift_Del	-
ATM_00087	ATM	Broeks et al. 1998	p.(Tyr2514*)	c.7542T>G	2514	Truncating	Nonsense_Mutation	-
ATM_00088	ATM	Broeks et al. 1998	p.(Tyr2514*)	c.7542T>A	2514	Truncating	Nonsense_Mutation	-
ATM_00089	ATM	Broeks et al. 1998	p.(Tyr2791*)	c.8373C>A	2791	Truncating	Nonsense_Mutation	-
ATM_00090	ATM	Becker-Catania et al. 2000	p.(Gln1839*)	c.5515C>T	1839	Truncating	Nonsense_Mutation	-
ATM_00090	ATM	Broeks et al. 1998	p.(Gln1839*)	c.5515C>T	1839	Truncating	Nonsense_Mutation	-
ATM_00090	ATM	Verhagen et al. 2011,Netherlands:Amsterdam	p.(Gln1839*)	c.5515C>T	1839	Truncating	Nonsense_Mutation	-
ATM_00093	ATM	Sandoval 1999	p.(Val835fs)	c.2502_2503insA	835	Truncating	Frame_Shift_Ins	-
ATM_00093	ATM	Teraoka et al. 1999	p.(Val835fs)	c.2502_2503insA	835	Truncating	Frame_Shift_Ins	-
ATM_00093	ATM	Teraoka et al. 1999	p.(Val835fs)	c.2502_2503insA	835	Truncating	Frame_Shift_Ins	-
ATM_00093	ATM	Teraoka et al. 1999	p.(Val835fs)	c.2502_2503insA	835	Truncating	Frame_Shift_Ins	-
ATM_00093	ATM	Teraoka et al. 1999	p.(Val835fs)	c.2502_2503insA	835	Truncating	Frame_Shift_Ins	-
ATM_00093	ATM	Telatar et al. 1998	p.(Val835fs)	c.2502_2503insA	835	Truncating	Frame_Shift_Ins	-
ATM_00094	ATM	Sandoval 1999	p.(Met855_Asn856insTyr*)	c.2565_2566delGins21	855	Truncating	Frame_Shift_Del	inserted sequence TACTGATCTAAATAGATCAGT
ATM_00095	ATM	Sandoval 1999	p.(Tyr947fs)	c.2921+3A>T	947	Truncating	Frame_Shift_Ins	exon 21 deleted in cDNA
ATM_00095	ATM	Sandoval 1999	p.(Tyr947fs)	c.2921+3A>T	947	Truncating	Frame_Shift_Ins	exon 21 deleted in cDNA
ATM_00096	ATM	Teraoka et al. 1999	p.(Thr1029fs)	c.3085_3086insA	1029	Truncating	Frame_Shift_Ins	-
ATM_00096	ATM	Telatar et al. 1998	p.(Thr1029fs)	c.3085_3086insA	1029	Truncating	Frame_Shift_Ins	-
ATM_00096	ATM	Sandoval 1999	p.(Thr1029fs)	c.3085_3086insA	1029	Truncating	Frame_Shift_Ins	-
ATM_00096	ATM	Mitui et al. 2005	p.(Thr1029fs)	c.3085_3086insA	1029	Truncating	Frame_Shift_Ins	-
ATM_00096	ATM	Mitui et al. 2005	p.(Thr1029fs)	c.3085_3086insA	1029	Truncating	Frame_Shift_Ins	-
ATM_00096	ATM	Castellvi-Bel et al. 1999	p.(Thr1029fs)	c.3085_3086insA	1029	Truncating	Frame_Shift_Ins	-
ATM_00097	ATM	Demuth et al. 2011	p.(Ser1135_Lys1192del58, Ser1135Ilefs*4)	c.3576G>A	1135	Truncating	Large_DEL	exon 26 deleted in cDNA, minor product from deletion of exons 26 and 27
ATM_00097	ATM	Demuth et al. 2011	p.(Ser1135_Lys1192del58, Ser1135Ilefs*4)	c.3576G>A	1135	Truncating	Large_DEL	exon 26 deleted in cDNA, minor product from deletion of exons 26 and 27
ATM_00097	ATM	Demuth et al. 2011	p.(Ser1135_Lys1192del58, Ser1135Ilefs*4)	c.3576G>A	1135	Truncating	Large_DEL	exon 26 deleted in cDNA, minor product deletion of exons 26 and 27
ATM_00097	ATM	Gilad 1998	p.(Ser1135_Lys1192del58)	c.3576G>A	1135	Truncating	Large_DEL	-
ATM_00097	ATM	Gilad 1998	p.(Ser1135_Lys1192del58)	c.3576G>A	1135	Truncating	Large_DEL	-
ATM_00097	ATM	Sandoval 1999	p.(Ser1135_Lys1192del58)	c.3576G>A	1135	Truncating	Large_DEL	-
ATM_00097	ATM	Sandoval 1999	p.(Ser1135_Lys1192del58)	c.3576G>A	1135	Truncating	Large_DEL	-
ATM_00097	ATM	Sandoval 1999	p.(Ser1135_Lys1192del58)	c.3576G>A	1135	Truncating	Large_DEL	-
ATM_00097	ATM	Sandoval 1999	p.(Ser1135_Lys1192del58)	c.3576G>A	1135	Truncating	Large_DEL	-
ATM_00097	ATM	Broeks et al. 1998	p.(Ser1135_Lys1192del58)	c.3576G>A	1135	Truncating	Large_DEL	-
ATM_00097	ATM	Broeks et al. 1998	p.(Ser1135_Lys1192del58)	c.3576G>A	1135	Truncating	Large_DEL	-
ATM_00097	ATM	Cavalieri et al. 2006	p.(Ser1135_Lys1192del58)	c.3576G>A	1135	Truncating	Large_DEL	-
ATM_00097	ATM	Cavalieri et al. 2006	p.(Ser1135_Lys1192del58)	c.3576G>A	1135	Truncating	Large_DEL	-
ATM_00097	ATM	Broeks et al. 1998	p.(Ser1135_Lys1192del58)	c.3576G>A	1135	Truncating	Large_DEL	-
ATM_00097	ATM	Broeks et al. 1998	p.(Ser1135_Lys1192del58)	c.3576G>A	1135	Truncating	Large_DEL	-
ATM_00097	ATM	Broeks et al. 1998	p.(Ser1135_Lys1192del58)	c.3576G>A	1135	Truncating	Large_DEL	-
ATM_00097	ATM	Broeks et al. 1998	p.(Ser1135_Lys1192del58)	c.3576G>A	1135	Truncating	Large_DEL	-
ATM_00097	ATM	Gilad 1998	p.(Ser1135_Lys1192del58)	c.3576G>A	1135	Truncating	Large_DEL	-
ATM_00097	ATM	Gilad 1998	p.(Ser1135_Lys1192del58)	c.3576G>A	1135	Truncating	Large_DEL	-
ATM_00097	ATM	Teraoka et al. 1999	p.(Ser1135_Lys1192del58)	c.3576G>A	1135	Truncating	Large_DEL	-
ATM_00097	ATM	Teraoka et al. 1999	p.(Ser1135_Lys1192del58)	c.3576G>A	1135	Truncating	Large_DEL	-
ATM_00097	ATM	Gilad 1998,_x001A__x001A_Magliozzi et al. 2006	p.(Ser1135_Lys1192del58)	c.3576G>A	1135	Truncating	Large_DEL	-
ATM_00097	ATM	Cavalieri et al. 2006	p.(Ser1135_Lys1192del58)	c.3576G>A	1135	Truncating	Large_DEL	Exon 26 deleted
ATM_00097	ATM	Cavalieri et al. 2006	p.(Ser1135_Lys1192del58)	c.3576G>A	1135	Truncating	Large_DEL	Exon 26 deleted; same as patient 53-103 from Buzin et al. 2003
ATM_00097	ATM	Magliozzi et al. 2006	p.(Ser1135_Lys1192del58)	c.3576G>A	1135	Truncating	Large_DEL	-
ATM_00097	ATM	Telatar et al. 1998	p.(Ser1135_Lys1192del58)	c.3576G>A	1135	Truncating	Large_DEL	founder mutation of Italian origin
ATM_00097	ATM	Sandoval 1999	p.(Ser1135_Lys1192del58)	c.3576G>A	1135	Truncating	Large_DEL	-
ATM_00097	ATM	Teraoka et al. 1999	p.(Ser1135_Lys1192del58)	c.3576G>A	1135	Truncating	Large_DEL	-
ATM_00097	ATM	Teraoka et al. 1999	p.(Ser1135_Lys1192del58)	c.3576G>A	1135	Truncating	Large_DEL	-
ATM_00097	ATM	Buzin et al. 2003	p.(Ser1135_Lys1192del58)	c.3576G>A	1135	Truncating	Large_DEL	-
ATM_00097	ATM	Gilad 1998	p.(Ser1135_Lys1192del58)	c.3576G>A	1135	Truncating	Large_DEL	-
ATM_00097	ATM	Buzin et al 2003	p.(Ser1135_Lys1192del58)	c.3576G>A	1135	Truncating	Large_DEL	-
ATM_00097	ATM	Buzin et al 2003	p.(Ser1135_Lys1192del58)	c.3576G>A	1135	Truncating	Large_DEL	-
ATM_00097	ATM	Netherlands:Amsterdam	p.(Ser1135_Lys1192del58)	c.3576G>A	1135	Truncating	Large_DEL	-
ATM_00097	ATM	Netherlands:Amsterdam	p.(Ser1135_Lys1192del58)	c.3576G>A	1135	Truncating	Large_DEL	-
ATM_00098	ATM	Sandoval 1999	p.(Val1268*)	c.3802_3802delG	1268	Truncating	Frame_Shift_Del	-
ATM_00098	ATM	Sandoval 1999	p.(Val1268*)	c.3802_3802delG	1268	Truncating	Frame_Shift_Del	-
ATM_00098	ATM	Teraoka et al. 1999	p.(Val1268*)	c.3802_3802delG	1268	Truncating	Frame_Shift_Del	-
ATM_00098	ATM	Teraoka et al. 1999	p.(Val1268*)	c.3802_3802delG	1268	Truncating	Frame_Shift_Del	-
ATM_00098	ATM	Mitui et al. 2003	p.(Val1268*)	c.3802_3802delG	1268	Truncating	Frame_Shift_Del	-
ATM_00098	ATM	Sandoval 1999	p.(Val1268*)	c.3802_3802delG	1268	Truncating	Frame_Shift_Del	-
ATM_00098	ATM	Stankovic 1998	p.(Val1268*)	c.3802_3802delG	1268	Truncating	Frame_Shift_Del	-
ATM_00098	ATM	Li and Swift, 2000	p.(Val1268*)	c.3802_3802delG	1268	Truncating	Frame_Shift_Del	-
ATM_00098	ATM	Magliozzi et al. 2006	p.(Val1268*)	c.3802_3802delG	1268	Truncating	Frame_Shift_Del	-
ATM_00098	ATM	Magliozzi et al. 2006	p.(Val1268*)	c.3802_3802delG	1268	Truncating	Frame_Shift_Del	-
ATM_00098	ATM	Gilad 1998,_x001A__x001A_Magliozzi et al. 2006	p.(Val1268*)	c.3802_3802delG	1268	Truncating	Frame_Shift_Del	-
ATM_00098	ATM	Mitui et al. 2003	p.(Val1268*)	c.3802_3802delG	1268	Truncating	Frame_Shift_Del	-
ATM_00098	ATM	Mitui et al. 2003	p.(Val1268*)	c.3802_3802delG	1268	Truncating	Frame_Shift_Del	-
ATM_00098	ATM	Coutinho et al. 2004	p.(Val1268*)	c.3802_3802delG	1268	Truncating	Frame_Shift_Del	-
ATM_00098	ATM	Mitui et al. 2003	p.(Val1268*)	c.3802_3802delG	1268	Truncating	Frame_Shift_Del	-
ATM_00098	ATM	Stankovic 1998	p.(Val1268*)	c.3802_3802delG	1268	Truncating	Frame_Shift_Del	-
ATM_00098	ATM	Stankovic 1998	p.(Val1268*)	c.3802_3802delG	1268	Truncating	Frame_Shift_Del	-
ATM_00098	ATM	Stankovic 1998	p.(Val1268*)	c.3802_3802delG	1268	Truncating	Frame_Shift_Del	-
ATM_00098	ATM	Coutinho et al. 2004	p.(Val1268*)	c.3802_3802delG	1268	Truncating	Frame_Shift_Del	-
ATM_00098	ATM	Demuth et al. 2011	p.(Val1268*)	c.3802_3802delG	1268	Truncating	Frame_Shift_Del	-
ATM_00099	ATM	Sandoval 1999	p.(Thr1284fs)	c.3850_3850delA	1284	Truncating	Frame_Shift_Del	-
ATM_00099	ATM	Sandoval 1999	p.(Thr1284fs)	c.3850_3850delA	1284	Truncating	Frame_Shift_Del	-
ATM_00100	ATM	Teraoka et al. 1999	p.(Leu1351fs)	c.4052_4052delT	1351	Truncating	Frame_Shift_Del	-
ATM_00100	ATM	Sandoval 1999	p.(Leu1351fs)	c.4052_4052delT	1351	Truncating	Frame_Shift_Del	-
ATM_00100	ATM	Buzin et al. 2003	p.(Leu1351fs)	c.4052_4052delT	1351	Truncating	Frame_Shift_Del	-
ATM_00100	ATM	Castellvi-Bel et al. 1999	p.(Leu1351fs)	c.4052_4052delT	1351	Truncating	Frame_Shift_Del	-
ATM_00101	ATM	Sandoval 1999	p.(Pro1382fs)	c.4143_4144insT	1382	Truncating	Frame_Shift_Ins	-
ATM_00101	ATM	Buzin et al. 2003	p.(Pro1382fs)	c.4143_4144insT	1382	Truncating	Frame_Shift_Ins	-
ATM_00102	ATM	Sandoval 1999	p.(?)	c.4909+1G>A	1635	Truncating	Frame_Shift_Ins	-
ATM_00102	ATM	Sandoval 1999	p.(?)	c.4909+1G>A	1635	Truncating	Frame_Shift_Ins	-
ATM_00102	ATM	Sandoval 1999	p.(?)	c.4909+1G>A	1635	Truncating	Frame_Shift_Ins	-
ATM_00102	ATM	Sandoval 1999	p.(?)	c.4909+1G>A	1635	Truncating	Frame_Shift_Ins	-
ATM_00103	ATM	Gilad 1998	p.(Met2938fs)	c.8814_8824del11	2938	Truncating	Frame_Shift_Del	-
ATM_00103	ATM	Sandoval 1999	p.(Met2938fs)	c.8814_8824del11	2938	Truncating	Frame_Shift_Del	-
ATM_00104	ATM	Sandoval 1999	p.(?)	c.8787-1G>T	2929	Truncating	Frame_Shift_Del	-
ATM_00105	ATM	Sandoval 1999	p.(Cys2931*)	c.8793T>A	2931	Truncating	Nonsense_Mutation	-
ATM_00106	ATM	Sandoval 1999	p.(Pro2907fs)	c.8720_8720delCinsTT	2907	Truncating	Frame_Shift_Del	-
ATM_00109	ATM	Broeks et al. 1998	p.(Phe2799fs)	c.8395_8404del10	2799	Truncating	Frame_Shift_Del	-
ATM_00109	ATM	Sandoval 1999	p.(Phe2799fs)	c.8395_8404del10	2799	Truncating	Frame_Shift_Del	-
ATM_00109	ATM	Li and Swift, 2000	p.(Phe2799fs)	c.8395_8404del10	2799	Truncating	Frame_Shift_Del	-
ATM_00109	ATM	Mitui et al. 2003	p.(Phe2799fs)	c.8395_8404del10	2799	Truncating	Frame_Shift_Del	-
ATM_00111	ATM	Broeks et al. 1998	p.(Asp2597fs)	c.7788G>A	2597	Truncating	Frame_Shift_Ins	exon 55 deleted in cDNA
ATM_00111	ATM	Broeks et al. 1998	p.(Asp2597fs)	c.7788G>A	2597	Truncating	Frame_Shift_Ins	exon 55 deleted in cDNA
ATM_00111	ATM	Broeks et al. 1998	p.(Asp2597fs)	c.7788G>A	2597	Truncating	Frame_Shift_Ins	exon 55 deleted in cDNA
ATM_00112	ATM	Broeks et al. 1998	p.(Val2951*)	c.8851-2189del16,667	2951	Truncating	Frame_Shift_Del	-
ATM_00112	ATM	Broeks et al. 1998	p.(Val2951*)	c.8851-2189del16,667	2951	Truncating	Frame_Shift_Del	-
ATM_00112	ATM	Broeks et al. 1998	p.(Val2951*)	c.8851-2189del16,667	2951	Truncating	Frame_Shift_Del	-
ATM_00112	ATM	Mitui et al. 2003	p.(Val2951*)	c.8851-2189del16,667	2951	Truncating	Frame_Shift_Del	-
ATM_00112	ATM	Mitui et al. 2003	p.(Val2951*)	c.8851-2189del16,667	2951	Truncating	Frame_Shift_Del	-
ATM_00112	ATM	Telatar et al. 1998	p.(Val2951*)	c.8851-2189del16,667	2951	Truncating	Frame_Shift_Del	-
ATM_00112	ATM	Demuth et al. 2011	p.(Val2951*)	c.8851-2189del16,667	2951	Truncating	Frame_Shift_Del	-
ATM_00113	ATM	Broeks et al. 1998	p.(Glu3007*)	c.9019G>T	3007	Truncating	Nonsense_Mutation	-
ATM_00114	ATM	Gilad 1998	p.(Arg469fs)	c.1607+1G>T	469	Truncating	Frame_Shift_Ins	last 201 nt of exon 12 deleted in cDNA
ATM_00114	ATM	Gilad 1998	p.(Arg469fs)	c.1607+1G>T	469	Truncating	Frame_Shift_Ins	last 201 nt of exon 12 deleted in cDNA
ATM_00114	ATM	Magliozzi et al. 2006	p.(Cys536fs)	c.1607+1G>T	536	Truncating	Frame_Shift_Ins	-
ATM_00114	ATM	Telatar et al. 1998	p.(Cys536fs)	c.1607+1G>T	536	Truncating	Frame_Shift_Ins	intron 12 retained
ATM_00115	ATM	Stankovic 1998	p.(Cys430*)	c.1290_1291delTG	430	Truncating	Frame_Shift_Del	-
ATM_00115	ATM	Li and Swift, 2000	p.(Cys430*)	c.1290_1291delTG	430	Truncating	Frame_Shift_Del	-
ATM_00116	ATM	Fares et al. 2004	p.(Arg447*)	c.1339C>T	447	Truncating	Nonsense_Mutation	-
ATM_00116	ATM	Fares et al. 2004	p.(Arg447*)	c.1339C>T	447	Truncating	Nonsense_Mutation	-
ATM_00116	ATM	Gilad et al. 1996b	p.(Arg447*)	c.1339C>T	447	Truncating	Nonsense_Mutation	-
ATM_00116	ATM	Gilad et al. 1996b	p.(Arg447*)	c.1339C>T	447	Truncating	Nonsense_Mutation	-
ATM_00117	ATM	Izatt et al. 1999	p.(Thr452fs)	c.1355_1355delC	452	Truncating	Frame_Shift_Del	-
ATM_00117	ATM	Stankovic 1998	p.(Thr452fs)	c.1355_1355delC	452	Truncating	Frame_Shift_Del	-
ATM_00118	ATM	Li and Swift, 2000	p.(Leu585fs)	c.1753_1756delTTAG	585	Truncating	Frame_Shift_Del	-
ATM_00119	ATM	Stankovic 1998	p.(Val596fs)	c.1782_1782delA	596	Truncating	Frame_Shift_Del	-
ATM_00120	ATM	Mitui et al. 2005	p.(Asn602_Cys633del32)	c.1898+2T>G	602	Truncating	Large_DEL	exon 14 deleted in cDNA
ATM_00120	ATM	Stankovic 1998	p.(Asn602_Cys633del32)	c.1898+2T>G	602	Truncating	Large_DEL	exon 14 deleted in cDNA
ATM_00122	ATM	Castellvi-Bel et al. 1999	p.(Ser644*)	c.1930_1931ins16	644	Truncating	Nonsense_Mutation	inserted sequence AGATAAGAGAAAACTT
ATM_00123	ATM	Li and Swift, 2000	p.(Ser644*)	c.1931C>A	644	Truncating	Nonsense_Mutation	-
ATM_00124	ATM	Li and Swift, 2000	p.(Glu688fs)	c.2062_2062delG	688	Truncating	Frame_Shift_Del	-
ATM_00125	ATM	Gilad et al. 1996b	p.(Tyr705fs)	c.2113_2113delT	705	Truncating	Frame_Shift_Del	-
ATM_00127	ATM	Castellvi-Bel et al. 1999	p.(?)	c.2250+2T>C	750	Truncating	Frame_Shift_Ins	-
ATM_00129	ATM	Wright et al. 1996,_x001A__x001A_Hacia et al. 1998	p.(Ser750fs)	c.2251-1G>A	750	Truncating	Frame_Shift_Ins	-
ATM_00130	ATM	Becker-Catania et al. 2000	p.(Lys750_Ser751insSerGln*)	c.2251-10T>G	750	Truncating	Nonsense_Mutation	-
ATM_00130	ATM	Telatar et al. 1998	p.(Lys750_Ser751insSerGln*)	c.2251-10T>G	750	Truncating	Nonsense_Mutation	-
ATM_00130	ATM	Teraoka et al. 1999	p.(Lys750_Ser751insSerGln*)	c.2251-10T>G	750	Truncating	Nonsense_Mutation	-
ATM_00130	ATM	Teraoka et al. 1999,_x001A__x001A_Buzin et al. 2003	p.(Lys750_Ser751insSerGln*)	c.2251-10T>G	750	Truncating	Nonsense_Mutation	insertion 2 amino acids and a stop codon
ATM_00130	ATM	Buzin et al 2003	p.(Lys750_Ser751insSerGln*)	c.2251-10T>G	750	Truncating	Nonsense_Mutation	-
ATM_00133	ATM	Gilad et al. 1996b	p.(Leu762fs)	c.2284_2285delCT	762	Truncating	Frame_Shift_Del	-
ATM_00133	ATM	Gilad et al. 1996b	p.(Leu762fs)	c.2284_2285delCT	762	Truncating	Frame_Shift_Del	-
ATM_00133	ATM	Stankovic 1998	p.(Leu762fs)	c.2284_2285delCT	762	Truncating	Frame_Shift_Del	-
ATM_00133	ATM	Byrd et al. 1996	p.(Leu762fs)	c.2284_2285delCT	762	Truncating	Frame_Shift_Del	-
ATM_00135	ATM	Broeks et al. 1998	p.(Ser751_Lys792del42)	c.2376G>A	751	Truncating	Large_DEL	-
ATM_00136	ATM	Vorechovsky et al. 1996c	p.(Lys793_Leu822del30)	c.2466+1delG	793	Truncating	LARGE_DEL	-
ATM_00137	ATM	Teraoka et al. 1999,_x001A__x001A_Buzin et al. 2003	p.(Ser793_Leu822del30)	c.2466+1G>A	793	Truncating	Large_DEL	-
ATM_00139	ATM	Vorechovsky et al. 1996c	p.(Arg805*)	c.2413C>T	805	Truncating	Nonsense_Mutation	-
ATM_00139	ATM	Babaei et al. 2005	p.(Arg805*)	c.2413C>T	805	Truncating	Nonsense_Mutation	-
ATM_00139	ATM	Babaei et al. 2005	p.(Arg805*)	c.2413C>T	805	Truncating	Nonsense_Mutation	-
ATM_00139	ATM	Cavalieri et al. 2006	p.(Arg805*)	c.2413C>T	805	Truncating	Nonsense_Mutation	-
ATM_00139	ATM	Mitui et al. 2003	p.(Arg805*)	c.2413C>T	805	Truncating	Nonsense_Mutation	-
ATM_00139	ATM	Mitui et al. 2003	p.(Arg805*)	c.2413C>T	805	Truncating	Nonsense_Mutation	-
ATM_00140	ATM	Vorechovsky et al. 1996c	p.(Ser821fs)	c.2463_2467del5	821	Truncating	Frame_Shift_Del	-
ATM_00140	ATM	Vorechovsky et al. 1996c	p.(Ser821fs)	c.2463_2467del5	821	Truncating	Frame_Shift_Del	-
ATM_00142	ATM	Broeks et al. 1998	p.(Asp841fs)	c.2521_2521delG	841	Truncating	Frame_Shift_Del	-
ATM_00144	ATM	Li and Swift, 2000	p.(P872fs)	c.2614_2615insA	872	Truncating	Frame_Shift_Ins	-
ATM_00146	ATM	Li and Swift, 2000	p.(Phe897fs)	c.2689_2693del5	897	Truncating	Frame_Shift_Del	-
ATM_00147	ATM	Li and Swift, 2000	p.(Cys907fs)	c.2720_2723del4	907	Truncating	Frame_Shift_Del	-
ATM_00148	ATM	Teraoka et al. 1999	p.(Glu937fs)	c.2809_2810insCTAG	937	Truncating	Frame_Shift_Ins	-
ATM_00148	ATM	Telatar et al. 1998	p.(Glu937fs)	c.2809_2810insCTAG	937	Truncating	Frame_Shift_Ins	-
ATM_00149	ATM	Teraoka et al. 1999	p.(Tyr947fs)	c.2839-581delGTAA	947	Truncating	Frame_Shift_Del	-
ATM_00149	ATM	Mitui et al. 2003	p.(Tyr947fs)	c.2839-581delGTAA	947	Truncating	Frame_Shift_Del	-
ATM_00149	ATM	Mitui et al. 2003	p.(Tyr947fs)	c.2839-581delGTAA	947	Truncating	Frame_Shift_Del	pseudo-exon inclusion
ATM_00149	ATM	Pagani et al. 2002	p.(Tyr947fs)	c.2839-581delGTAA	947	Truncating	Frame_Shift_Del	65 nt insert before exon 21
ATM_00149	ATM	Mitui et al. 2005	p.(Tyr947fs)	c.2839-581delGTAA	947	Truncating	Frame_Shift_Del	-
ATM_00150	ATM	Castellvi-Bel et al. 1999	p.(Tyr947fs)	c.2921+1G>A	947	Truncating	Frame_Shift_Ins	exon 21 deletion proposed
ATM_00150	ATM	Mitui et al. 2003	p.(?)	c.2921+1G>A	973	Truncating	Frame_Shift_Ins	-
ATM_00150	ATM	Mitui et al. 2003	p.(?)	c.2921+1G>A	973	Truncating	Frame_Shift_Ins	-
ATM_00151	ATM	Gilad et al. 1996b	p.(Tyr947fs)	c.?	947	Truncating	Frame_Shift_Ins	exon 21 deleted in cDNA
ATM_00151	ATM	Gilad et al. 1996b	p.(Tyr947fs)	c.?	947	Truncating	Frame_Shift_Ins	exon 21 deleted in cDNA
ATM_00151	ATM	Gilad et al. 1996b	p.(Tyr947fs)	c.?	947	Truncating	Frame_Shift_Ins	exon 21 deleted in cDNA
ATM_00151	ATM	Gilad et al. 1996b	p.(Tyr947fs)	c.?	947	Truncating	Frame_Shift_Ins	exon 21 deleted in cDNA
ATM_00151	ATM	Stankovic 1998	p.(Tyr947fs)	c.?	947	Truncating	Frame_Shift_Ins	exon 21 deleted in cDNA
ATM_00153	ATM	Izatt et al. 1999	p.(His1027fs)	c.3078-1G>A	1027	Truncating	Frame_Shift_Ins	exon 23 skipped
ATM_00155	ATM	Wright et al. 1996	p.(Ser1037fs)	c.3109_3181del73	1037	Truncating	Frame_Shift_Del	-
ATM_00156	ATM	Telatar et al. 1998	p.(Glu1072*)	c.3214G>T	1072	Truncating	Nonsense_Mutation	-
ATM_00156	ATM	Teraoka et al. 1999	p.(Glu1072*)	c.3214G>T	1072	Truncating	Nonsense_Mutation	-
ATM_00156	ATM	Teraoka et al. 1999	p.(Glu1072*)	c.3214G>T	1072	Truncating	Nonsense_Mutation	-
ATM_00156	ATM	Mitui et al. 2005	p.(Glu1072*)	c.3214G>T	1072	Truncating	Nonsense_Mutation	-
ATM_00157	ATM	Li and Swift, 2000	p.(Ile1093fs)	c.3275_3276insA	1093	Truncating	Frame_Shift_Ins	-
ATM_00158	ATM	Li and Swift, 2000	p.(Tyr1124*)	c.3372C>G	1124	Truncating	Nonsense_Mutation	-
ATM_00158	ATM	Li and Swift, 2000	p.(Tyr1124*)	c.3372C>G	1124	Truncating	Nonsense_Mutation	-
ATM_00158	ATM	Teraoka et al. 1999	p.(Tyr1124*)	c.3372C>G	1124	Truncating	Nonsense_Mutation	-
ATM_00158	ATM	Li and Swift, 2000	p.(Tyr1124*)	c.3372C>G	1124	Truncating	Nonsense_Mutation	-
ATM_00159	ATM	Castellvi-Bel et al. 1999	p.(Gln1128fs)	c.3381_3384delTCAG	1128	Truncating	Frame_Shift_Del	-
ATM_00160	ATM	Teraoka et al. 1999	p.(Gln1128*)	c.3382C>T	1128	Truncating	Nonsense_Mutation	-
ATM_00161	ATM	Stankovic 1998	p.(Ser1135_Lys1192del58)	c.3403-12T>A	1135	Truncating	Large_DEL	-
ATM_00163	ATM	Becker-Catania et al. 2000	p.(Gln1171*)	c.3511C>T	1171	Truncating	Nonsense_Mutation	-
ATM_00164	ATM	Teraoka et al. 1999	p.(Phe1201fs)	c.3602_3603delTT	1201	Truncating	Frame_Shift_Del	-
ATM_00164	ATM	Li and Swift, 2000	p.(Phe1201fs)	c.3602_3603delTT	1201	Truncating	Frame_Shift_Del	-
ATM_00164	ATM	Li and Swift, 2000	p.(Phe1201fs)	c.3602_3603delTT	1201	Truncating	Frame_Shift_Del	-
ATM_00164	ATM	Castellvi-Bel et al. 1999	p.(Phe1201fs)	c.3602_3603delTT	1201	Truncating	Frame_Shift_Del	-
ATM_00165	ATM	Teraoka et al. 1999	p.(Trp1221*)	c.3663G>A	1221	Truncating	Nonsense_Mutation	-
ATM_00166	ATM	Vorechovsky et al. 1996c	p.(Leu1238fs)	c.3712_3716delTTATT	1238	Truncating	Frame_Shift_Del	-
ATM_00166	ATM	Mitui et al. 2003	p.(Leu1238fs)	c.3712_3716delTTATT	1238	Truncating	Frame_Shift_Del	-
ATM_00167	ATM	Broeks et al. 1998	p.(Leu1238fs)	c.3712_3716delTTATT	1238	Truncating	Frame_Shift_Del	-
ATM_00167	ATM	Broeks et al. 1998	p.(Leu1238fs)	c.3712_3716delTTATT	1238	Truncating	Frame_Shift_Del	-
ATM_00167	ATM	Li and Swift, 2000	p.(Leu1238fs)	c.3712_3716delTTATT	1238	Truncating	Frame_Shift_Del	-
ATM_00168	ATM	Stankovic 1998	p.(Cys1286fs)	c.3856_3856delT	1286	Truncating	Frame_Shift_Del	-
ATM_00169	ATM	Mitui et al. 2003	p.(Ala1299fs)	c.3894_3895insT	1299	Truncating	Frame_Shift_Ins	-
ATM_00169	ATM	Mitui et al. 2003	p.(Ala1299fs)	c.3894_3895insT	1299	Truncating	Frame_Shift_Ins	-
ATM_00169	ATM	Teraoka et al. 1999	p.(Ala1299fs)	c.3894_3895insT	1299	Truncating	Frame_Shift_Ins	-
ATM_00169	ATM	Teraoka et al. 1999	p.(Ala1299fs)	c.3894_3895insT	1299	Truncating	Frame_Shift_Ins	-
ATM_00170	ATM	Stankovic 1998	p.(Gly1302fs)	c.3905_3911del7	1302	Truncating	Frame_Shift_Del	-
ATM_00171	ATM	Stankovic 1998	p.(Arg1304fs)	c.3910del7	1304	Truncating	Frame_Shift_Del	-
ATM_00171	ATM	Stankovic 1998	p.(Arg1304fs)	c.3910del7	1304	Truncating	Frame_Shift_Del	-
ATM_00172	ATM	Li and Swift, 2000	p.(Ser1369fs)	c.4105_4105delT	1369	Truncating	Frame_Shift_Del	-
ATM_00175	ATM	Teraoka et al. 1999	p.(Gly1458fs)	c.4373_4373delG	1458	Truncating	Frame_Shift_Del	-
ATM_00175	ATM	Li and Swift, 2000	p.(Gly1458fs)	c.4373_4373delG	1458	Truncating	Frame_Shift_Del	-
ATM_00176	ATM	Stankovic 1998	p.(F1463fs)	c.4389_4389delT	1463	Truncating	Frame_Shift_Del	-
ATM_00178	ATM	Teraoka et al. 1999,_x001A__x001A_Buzin et al. 2003	p.(Arg1466*)	c.4396C>T	1466	Truncating	Nonsense_Mutation	-
ATM_00178	ATM	Castellvi-Bel et al. 1999	p.(Arg1466*)	c.4396C>T	1466	Truncating	Nonsense_Mutation	-
ATM_00179	ATM	Teraoka et al. 1999	p.(Val1538Ilefs*9)	c.4612-12A>G	1538	Truncating	Frame_Shift_Ins	new splice acceptor created upstream of exon 33
ATM_00179	ATM	Teraoka et al. 1999	p.(Val1538Ilefs*9)	c.4612-12A>G	1538	Truncating	Frame_Shift_Ins	new splice acceptor created upstream of exon 33
ATM_00180	ATM	Vorechovsky et al. 1996c	p.(V1506*)	c.4518_4519ins29	1506	Truncating	Nonsense_Mutation	-
ATM_00180	ATM	Vorechovsky et al. 1996c	p.(V1506*)	c.4518_4519ins29	1506	Truncating	Nonsense_Mutation	-
ATM_00181	ATM	Li and Swift, 2000	p.(Cys1509fs)	c.4524_4525insA	1509	Truncating	Frame_Shift_Ins	-
ATM_00182	ATM	Hacia et al. 1998	p.(Arg1618*)	c.4582C>T	1618	Truncating	Nonsense_Mutation	-
ATM_00183	ATM	Hacia et al. 1998	p.(R1480*)	c.4611-IVS32+9del10	1480	Truncating	Frame_Shift_Del	-
ATM_00183	ATM	Hacia et al. 1998	p.(R1480*)	c.4611-IVS32+9del10	1480	Truncating	Frame_Shift_Del	-
ATM_00184	ATM	Ejima and Sasaki, 1998	p.(Val1538_Glu1592del55)	c.4776+2T>A	1538	Truncating	Large_DEL	-
ATM_00184	ATM	Ejima and Sasaki, 1998	p.(Val1538_Glu1592del55)	c.4776+2T>A	1538	Truncating	Large_DEL	-
ATM_00184	ATM	Ejima and Sasaki, 1998	p.(Val1538_Glu1592del55)	c.4776+2T>A	1538	Truncating	Large_DEL	-
ATM_00184	ATM	Ejima and Sasaki, 1998	p.(Val1538_Glu1592del55)	c.4776+2T>A	1538	Truncating	Large_DEL	-
ATM_00185	ATM	Gilad 1998	p.(Val1538_Glu1592del55)	c.4776+2T>C	1538	Truncating	Large_DEL	-
ATM_00185	ATM	Gilad 1998	p.(Val1538_Glu1592del55)	c.4776+2T>C	1538	Truncating	Large_DEL	-
ATM_00185	ATM	Mitui et al. 2003	p.(Val1538_Glu1592del55)	c.4776+2T>C	1538	Truncating	Large_DEL	-
ATM_00186	ATM	Gilad et al. 1996b	p.(Val1538_Glu1592del55)	c.?	1538	Truncating	Large_DEL	exon 33 deleted in cDNA
ATM_00186	ATM	Gilad et al. 1996b	p.(Val1538_Glu1592del55)	c.?	1538	Truncating	Large_DEL	exon 33 deleted in cDNA
ATM_00187	ATM	Wright et al. 1996,_x001A__x001A_Hacia et al. 1998	p.(Asp1548fs)	c.4642_4645del4	1548	Truncating	Frame_Shift_Del	-
ATM_00187	ATM	Li and Swift, 2000	p.(Asp1548fs)	c.4642_4645del4	1548	Truncating	Frame_Shift_Del	-
ATM_00188	ATM	Ejima and Sasaki, 1998	p.(Lys1550*)	c.4649_4649delA	1550	Truncating	Frame_Shift_Del	-
ATM_00189	ATM	Li and Swift, 2000	p.(Ile1581fs)	c.4742_4743insA	1581	Truncating	Frame_Shift_Ins	-
ATM_00190	ATM	Telatar et al. 1996,_x001A__x001A_Mitui et al. 2005	p.(E1592*)	c.4777del229	1592	Truncating	Frame_Shift_Del	-
ATM_00191	ATM	Watters et al. 1997	p.(1592)	c.4777del897	1592	Truncating	LARGE_DEL	-
ATM_00192	ATM	Gilad 1998	p.(1592)	c.4777del1230	1592	Truncating	LARGE_DEL	-
ATM_00192	ATM	Gilad 1998	p.(1592)	c.4777del1230	1592	Truncating	LARGE_DEL	-
ATM_00193	ATM	Ejima and Sasaki, 1998	p.(Asp1637_Leu1668del32)	c.4910del96	1637	Truncating	LARGE_DEL	1.1 kb genomic deletion removing exon 35
ATM_00193	ATM	Ejima and Sasaki, 1998	p.(Asp1637_Leu1668del32)	c.4910del96	1637	Truncating	LARGE_DEL	1.1 kb genomic deletion removing exon 35
ATM_00195	ATM	Telatar et al. 1996	p.(Val1727Phefs*2)	c.?	1727	Truncating	Frame_Shift_Ins	exon 37 deleted in cDNA
ATM_00196	ATM	Telatar et al. 1996,_x001A__x001A_Mitui et al. 2005	p.(Arg1730*)	c.5188C>T	1730	Truncating	Nonsense_Mutation	-
ATM_00196	ATM	Mitui et al. 2003	p.(Arg1730*)	c.5188C>T	1730	Truncating	Nonsense_Mutation	-
ATM_00196	ATM	Mitui et al. 2005	p.(Arg1730*)	c.5188C>T	1730	Truncating	Nonsense_Mutation	-
ATM_00196	ATM	Buzin et al 2003	p.(Arg1730*)	c.5188C>T	1730	Truncating	Nonsense_Mutation	-
ATM_00196	ATM	Castellvi-Bel et al. 1999	p.(Arg1730*)	c.5188C>T	1730	Truncating	Nonsense_Mutation	-
ATM_00196	ATM	Netherlands:Amsterdam	p.(Arg1730*)	c.5188C>T	1730	Truncating	Nonsense_Mutation	-
ATM_00198	ATM	Teraoka et al. 1999	p.(Leu1764fs)	c.5290_5290delC	1764	Truncating	Frame_Shift_Del	-
ATM_00198	ATM	Buzin et al. 2003	p.(Leu1764fs)	c.5290_5290delC	1764	Truncating	Frame_Shift_Del	-
ATM_00198	ATM	Castellvi-Bel et al. 1999	p.(Leu1764fs)	c.5290_5290delC	1764	Truncating	Frame_Shift_Del	-
ATM_00199	ATM	Li and Swift, 2000	p.(Gln1765*)	c.5293C>T	1765	Truncating	Nonsense_Mutation	-
ATM_00200	ATM	Sandoval 1999	p.(Ser1770*)	c.5309_5309delC	1770	Truncating	Frame_Shift_Del	-
ATM_00201	ATM	Gilad et al. 1996b	p.(Lys1773_Phe1774 insValSer*)	c.?	1773	Truncating	Nonsense_Mutation	mutation not specified but similar in effect to ATM00065
ATM_00202	ATM	Gilad et al. 1996b	p.(Phe1774Lysfs*17)	c.?	1774	Truncating	Frame_Shift_Ins	-
ATM_00203	ATM	Gilad et al. 1996b	p.(F1774*)	c.5320del355	1774	Truncating	Frame_Shift_Del	-
ATM_00204	ATM	Li and Swift, 2000	p.(L1775*)	c.5324_5324delT	1775	Truncating	Frame_Shift_Del	-
ATM_00205	ATM	Stankovic 1998	p.(Leu1789fs)	c.5366delT	1789	Truncating	Frame_Shift_Del	-
ATM_00207	ATM	Sandoval 1999	p.(Leu1814fs)	c.5441_5442insT	1814	Truncating	Frame_Shift_Ins	-
ATM_00208	ATM	Teraoka et al. 1999	p.(Val1833Ilefs*)	c.5497-2A>C	1833	Truncating	Frame_Shift_Ins	deletion of first 61 nt of exon 39
ATM_00209	ATM	Savitsky et al. 1995a	p.(H1847fs)	c.5539_5549del11	1847	Truncating	Frame_Shift_Del	-
ATM_00209	ATM	Savitsky et al. 1995a	p.(H1847fs)	c.5539_5549del11	1847	Truncating	Frame_Shift_Del	-
ATM_00210	ATM	Sandoval 1999	p.(Leu1850fs)	c.5549_5549delT	1850	Truncating	Frame_Shift_Del	-
ATM_00210	ATM	Li and Swift, 2000	p.(Leu1850fs)	c.5549_5549delT	1850	Truncating	Frame_Shift_Del	-
ATM_00210	ATM	Mitui et al. 2005	p.(Leu1850fs)	c.5549_5549delT	1850	Truncating	Frame_Shift_Del	-
ATM_00210	ATM	Mitui et al. 2005	p.(Leu1850fs)	c.5549_5549delT	1850	Truncating	Frame_Shift_Del	-
ATM_00210	ATM	Castellvi-Bel et al. 1999	p.(Leu1850fs)	c.5549_5549delT	1850	Truncating	Frame_Shift_Del	-
ATM_00211	ATM	Savitsky et al. 1995a	p.(Gln1852fs)	c.5554_5555insC	1852	Truncating	Frame_Shift_Ins	-
ATM_00211	ATM	Savitsky et al. 1995a	p.(Gln1852fs)	c.5554_5555insC	1852	Truncating	Frame_Shift_Ins	-
ATM_00212	ATM	Li and Swift, 2000	p.(Gln1852fs)	c.5555_5556insCA	1852	Truncating	Frame_Shift_Ins	-
ATM_00213	ATM	Gilad 1998	p.(Arg1875*)	c.5623C>T	1875	Truncating	Nonsense_Mutation	-
ATM_00213	ATM	Gilad 1998	p.(Arg1875*)	c.5623C>T	1875	Truncating	Nonsense_Mutation	-
ATM_00213	ATM	Teraoka et al. 1999	p.(Arg1875*)	c.5623C>T	1875	Truncating	Nonsense_Mutation	-
ATM_00213	ATM	Teraoka et al. 1999	p.(Arg1875*)	c.5623C>T	1875	Truncating	Nonsense_Mutation	-
ATM_00214	ATM	Telatar et al. 1996	p.(Thr1884fs)	c.5650_5657del8	1884	Truncating	Frame_Shift_Del	-
ATM_00214	ATM	Telatar et al. 1996	p.(Thr1884fs)	c.5650_5657del8	1884	Truncating	Frame_Shift_Del	-
ATM_00004	ATM	Sandoval 1999	p.(?)	c.72+2T>C	24	intron_variant	Intron	-
ATM_00215	ATM	Wright et al. 1996	p.(Pro1922Leufs*9)	c.5763-1050A>G	1922	Truncating	Frame_Shift_Ins	-
ATM_00215	ATM	Teraoka et al. 1999	p.(Pro1922Leufs*9)	c.5763-1050A>G	1922	Truncating	Frame_Shift_Ins	-
ATM_00215	ATM	Teraoka et al. 1999,_x001A__x001A_Buzin et al. 2003	p.(Pro1922Leufs*9)	c.5763-1050A>G	1922	Truncating	Frame_Shift_Ins	-
ATM_00215	ATM	Izatt et al. 1999	p.(Pro1922Leufs*9)	c.5763-1050A>G	1922	Truncating	Frame_Shift_Ins	-
ATM_00215	ATM	Sutton et al. 2004	p.(Pro1922Leufs*9)	c.5763-1050A>G	1922	Truncating	Frame_Shift_Ins	-
ATM_00215	ATM	Sutton et al. 2004	p.(Pro1922Leufs*9)	c.5763-1050A>G	1922	Truncating	Frame_Shift_Ins	-
ATM_00215	ATM	McConville et al. 1996	p.(Pro1922Leufs*9)	c.5763-1050A>G	1922	Truncating	Frame_Shift_Ins	-
ATM_00216	ATM	Wright et al. 1996,_x001A__x001A_Hacia et al. 1998	p.(E1892*)	c.5675del88	1892	Truncating	Frame_Shift_Del	-
ATM_00216	ATM	Wright et al. 1996	p.(E1892*)	c.5675del88	1892	Truncating	Frame_Shift_Del	-
ATM_00217	ATM	Becker-Catania et al. 2000	p.(S1905fs)	c.5712_5713insA	1905	Truncating	Frame_Shift_Ins	-
ATM_00217	ATM	Savitsky et al. 1995a	p.(S1905fs)	c.5712_5713insA	1905	Truncating	Frame_Shift_Ins	-
ATM_00217	ATM	Li and Swift, 2000	p.(S1905fs)	c.5712_5713insA	1905	Truncating	Frame_Shift_Ins	-
ATM_00217	ATM	Li and Swift, 2000	p.(S1905fs)	c.5712_5713insA	1905	Truncating	Frame_Shift_Ins	-
ATM_00217	ATM	Li and Swift, 2000	p.(S1905fs)	c.5712_5713insA	1905	Truncating	Frame_Shift_Ins	-
ATM_00217	ATM	Li and Swift, 2000	p.(S1905fs)	c.5712_5713insA	1905	Truncating	Frame_Shift_Ins	-
ATM_00217	ATM	Li and Swift, 2000	p.(S1905fs)	c.5712_5713insA	1905	Truncating	Frame_Shift_Ins	-
ATM_00217	ATM	Li and Swift, 2000	p.(S1905fs)	c.5712_5713insA	1905	Truncating	Frame_Shift_Ins	-
ATM_00217	ATM	Mitui et al. 2005	p.(Ser1905fs)	c.5712_5713insA	1905	Truncating	Frame_Shift_Ins	-
ATM_00219	ATM	Broeks et al. 1998	p.(Pro1922Asnfs*4))	c.5763-2A>T	1922	Truncating	Frame_Shift_Ins	-
ATM_00220	ATM	Li and Swift, 2000	p.(S1924*)	c.5771C>A	1924	Truncating	Nonsense_Mutation	-
ATM_00221	ATM	Castellvi-Bel et al. 1999	p.(ala1931fs)	c.5791_5791delGinsCCT	1931	Truncating	Frame_Shift_Del	-
ATM_00222	ATM	Sandoval 1999	p.(Ile1960fs)	c.5878_5878delA	1960	Truncating	Frame_Shift_Del	-
ATM_00223	ATM	Telatar et al. 1998	p.(Gln1970fs)	c.5908_5908delC	1970	Truncating	Frame_Shift_Del	-
ATM_00224	ATM	Stankovic 1998	p.(Glu1971fs)	c.5910_5910delA	1971	Truncating	Frame_Shift_Del	-
ATM_00225	ATM	Wright et al. 1996,_x001A__x001A_Teraoka et al. 1999	p.(Glu1991*)	c.5971G>T	1991	Truncating	Nonsense_Mutation	-
ATM_00226	ATM	Sandoval 1999	p.(Ser1993fs)	c.5977_5978insA	1993	Truncating	Frame_Shift_Ins	-
ATM_00227	ATM	Gilad et al. 1996b	p.(Ser1993fs)	c.5979_5983delTAAAG	1993	Truncating	Frame_Shift_Del	-
ATM_00227	ATM	Cavalieri et al. 2006	p.(Ser1993fs)	c.5979_5983delTAAAG	1993	Truncating	Frame_Shift_Del	-
ATM_00227	ATM	Magliozzi et al. 2006,Saviozzi et al. 2003	p.(Ser1993fs)	c.5979_5983delTAAAG	1993	Truncating	Frame_Shift_Del	-
ATM_00228	ATM	Telatar et al. 1996	p.(L2003*)	c.6007del89	2003	Truncating	Frame_Shift_Del	-
ATM_00229	ATM	Telatar et al. 1996,_x001A__x001A_Hacia et al. 1998	p.(Glu2007fs)	c.6015_6016insC	2007	Truncating	Nonsense_Mutation	-
ATM_00229	ATM	Li and Swift, 2000	p.(Glu2007*)	c.6015_6016insC	2007	Truncating	Nonsense_Mutation	-
ATM_00230	ATM	Sandoval 1999	p.(Glu2014*)	c.6040G>T	2014	Truncating	Nonsense_Mutation	-
ATM_00230	ATM	Sandoval 1999	p.(Glu2014*)	c.6040G>T	2014	Truncating	Nonsense_Mutation	-
ATM_00232	ATM	Lakin et al. 1996	p.(Tyr2019fs)	c.6056_6056delA	2019	Truncating	Frame_Shift_Del	-
ATM_00233	ATM	Sandoval 1999	p.(R2032*)	c.6096-9del5	2032	Truncating	Frame_Shift_Del	-
ATM_00234	ATM	Stankovic 1998	p.(R2032*)	c.6198+1G>A	2032	Truncating	Nonsense_Mutation	-
ATM_00236	ATM	Telatar et al. 1996,Teraoka et al. 1999	p.(Arg2034*)	c.6100C>T	2034	Truncating	Nonsense_Mutation	-
ATM_00236	ATM	Telatar et al. 1996	p.(Arg2034*)	c.6100C>T	2034	Truncating	Nonsense_Mutation	-
ATM_00239	ATM	Castellvi-Bel et al. 1999	p.(?)	c.6199-1G>T	2066	Truncating	Frame_Shift_Ins	-
ATM_00240	ATM	Teraoka et al. 1999	p.(Asp2003Glnfs*10)	c.6347+1G>A	2003	Truncating	Frame_Shift_Ins	exons 43-45 deleted in cDNA
ATM_00240	ATM	Teraoka et al. 1999	p.(Asp2003Glnfs*10)	c.6347+1G>A	2003	Truncating	Frame_Shift_Ins	exons 43-45 deleted in cDNA
ATM_00242	ATM	Gilad et al. 1996b	p.(Ala2067*)	c.6199del149	2067	Truncating	Frame_Shift_Del	-
ATM_00242	ATM	Gilad et al. 1996b	p.(Ala2067*)	c.6199del149	2067	Truncating	Frame_Shift_Del	-
ATM_00244	ATM	Li and Swift, 2000	p.(Leu2077fs)	c.6228_6228delT	2077	Truncating	Frame_Shift_Del	-
ATM_00245	ATM	Telatar et al. 1996,Teraoka et al. 1999	p.(Ser2116_Ala2150del35)	c.6452+1G>A	2116	Truncating	Large_DEL	exon 46 deleted in cDNA
ATM_00246	ATM	Gilad et al. 1996b	p.(2116)	c.6348del105	2116	Truncating	LARGE_DEL	-
ATM_00246	ATM	Gilad et al. 1996b	p.(2116)	c.6348del105	2116	Truncating	LARGE_DEL	-
ATM_00247	ATM	Li and Swift, 2000	p.(Tyr2124*)	c.6371_6372insG	2124	Truncating	Nonsense_Mutation	-
ATM_00248	ATM	Telatar et al. 1996,Teraoka et al. 1999	p.(Y2124*)	c.6372_6373insG	2124	Truncating	Nonsense_Mutation	-
ATM_00249	ATM	Telatar et al. 1996	p.(Arg2136fs)	c.6405_6406insTT	2136	Truncating	Frame_Shift_Ins	-
ATM_00250	ATM	Stankovic 1998	p.(Arg2136fs)	c.6405_6406insTT	2136	Truncating	Frame_Shift_Ins	-
ATM_00250	ATM	Stankovic 1998	p.(Arg2136fs)	c.6405_6406insTT	2136	Truncating	Frame_Shift_Ins	-
ATM_00251	ATM	Watters et al. 1997	p.(Glu2139fs)	c.6415_6416delGA	2139	Truncating	Frame_Shift_Del	-
ATM_00251	ATM	Stankovic 1998	p.(Glu2139fs)	c.6415_6416delGA	2139	Truncating	Frame_Shift_Del	-
ATM_00252	ATM	Gilad 1998	p.(Ser2192fs)	c.6573-9G>A	2192	Truncating	Frame_Shift_Ins	-
ATM_00252	ATM	Gilad 1998	p.(Ser2192fs)	c.6573-9G>A	2192	Truncating	Frame_Shift_Ins	-
ATM_00252	ATM	Cavalieri et al. 2006	p.(Ser2292fs)	c.6573-9G>A	2292	Truncating	Frame_Shift_Ins	Exon 48 deleted
ATM_00253	ATM	Wright et al. 1996	p.(2191)	c.6573del81	2191	Truncating	LARGE_DEL	-
ATM_00254	ATM	Gilad et al. 1996b	p.(R2192*)	c.6573_6577del5	2192	Truncating	Frame_Shift_Del	-
ATM_00257	ATM	Becker-Catania et al. 2000	p.(Cys2246_Thr2252del7insHis)	c.6736_6756del21insCAT	2246	Truncating	LARGE_DEL	-
ATM_00257	ATM	Becker-Catania et al. 2000	p.(Cys2246_Thr2252del7insHis)	c.6736_6756del21insCAT	2246	Truncating	LARGE_DEL	-
ATM_00258	ATM	Telatar et al. 1996	p.(Pro2271fs)	c.6810_6810delC	2271	Truncating	Frame_Shift_Del	-
ATM_00258	ATM	Telatar et al. 1996	p.(Pro2271fs)	c.6810_6810delC	2271	Truncating	Frame_Shift_Del	-
ATM_00259	ATM	Sandoval 1999	p.(Glu2290*)	c.6867_6868insT	2290	Truncating	Nonsense_Mutation	-
ATM_00259	ATM	Sandoval 1999	p.(Glu2290*)	c.6867_6868insT	2290	Truncating	Nonsense_Mutation	-
ATM_00260	ATM	Stankovic 1998	p.(Ser2306fs)	c.6916_6917delAG	2306	Truncating	Frame_Shift_Del	-
ATM_00261	ATM	Wright et al. 1996	p.(2326)	c.6976del114	2326	Truncating	LARGE_DEL	-
ATM_00262	ATM	Stankovic 1998	p.(Lys2331*)	c.6988_6989insT	2331	Truncating	Nonsense_Mutation	-
ATM_00263	ATM	Li and Swift, 2000	p.(T2333fs)	c.6997_6998insA	2333	Truncating	Frame_Shift_Ins	-
ATM_00263	ATM	Li and Swift, 2000	p.(T2333fs)	c.6997_6998insA	2333	Truncating	Frame_Shift_Ins	-
ATM_00263	ATM	Li and Swift, 2000	p.(T2333fs)	c.6997_6998insA	2333	Truncating	Frame_Shift_Ins	-
ATM_00263	ATM	Stankovic 1998	p.(T2333fs)	c.6997_6998insA	2333	Truncating	Frame_Shift_Ins	-
ATM_00264	ATM	Teraoka et al. 1999	p.(Tyr2333fs)	c.6998_6999insA	2333	Truncating	Frame_Shift_Ins	-
ATM_00265	ATM	Telatar et al. 1996	p.(Cys2337fs)	c.7010_7011delGT	2337	Truncating	Frame_Shift_Del	-
ATM_00265	ATM	Telatar et al. 1996,_x001A__x001A_Buzin et al. 2003	p.(Cys2337fs)	c.7010_7011delGT	2337	Truncating	Frame_Shift_Del	-
ATM_00265	ATM	Li and Swift, 2000	p.(Cys2337fs)	c.7010_7011delGT	2337	Truncating	Frame_Shift_Del	-
ATM_00265	ATM	Mitui et al. 2005	p.(Cys2337fs)	c.7010_7011delGT	2337	Truncating	Frame_Shift_Del	-
ATM_00265	ATM	Mitui et al. 2005	p.(Cys2337fs)	c.7010_7011delGT	2337	Truncating	Frame_Shift_Del	-
ATM_00265	ATM	Mitui et al. 2005	p.(Cys2337fs)	c.7010_7011delGT	2337	Truncating	Frame_Shift_Del	-
ATM_00266	ATM	Castellvi-Bel et al. 1999	p.(Phe2387*)	c.7159_7160insAGCC	2387	Truncating	Nonsense_Mutation	-
ATM_00267	ATM	Gilad 1998	p.(Gln2414fs)	c.7240_7243del4	2414	Truncating	Frame_Shift_Del	-
ATM_00267	ATM	Gilad 1998	p.(Gln2414fs)	c.7240_7243del4	2414	Truncating	Frame_Shift_Del	-
ATM_00268	ATM	Stankovic 1998	p.(V2424*)	c.7270del38	2424	Truncating	Frame_Shift_Del	-
ATM_00271	ATM	Wright et al. 1996	p.(Arg2443*)	c.7327C>T	2443	Truncating	Nonsense_Mutation	-
ATM_00271	ATM	Sandoval 1999	p.(Arg2443*)	c.7327C>T	2443	Truncating	Nonsense_Mutation	-
ATM_00271	ATM	Li and Swift, 2000	p.(Arg2443*)	c.7327C>T	2443	Truncating	Nonsense_Mutation	-
ATM_00271	ATM	Li and Swift, 2000	p.(Arg2443*)	c.7327C>T	2443	Truncating	Nonsense_Mutation	-
ATM_00273	ATM	Telatar et al. 1998	p.(Trp2483*)	c.7449G>A	2483	Truncating	Nonsense_Mutation	-
ATM_00274	ATM	Cavalieri et al. 2006	p.(Arg 2505Thrfs*3)	c.7517_7520delGAGA	2505	Truncating	Frame_Shift_Del	-
ATM_00274	ATM	Cavalieri et al. 2006	p.(Arg 2505Thrfs*3)	c.7517_7520delGAGA	2505	Truncating	Frame_Shift_Del	-
ATM_00274	ATM	Gilad et al. 1996b	p.(Arg 2505Thrfs*3)	c.7517_7520delGAGA	2505	Truncating	Frame_Shift_Del	-
ATM_00274	ATM	Gilad et al. 1996b	p.(Arg 2505Thrfs*3)	c.7517_7520delGAGA	2505	Truncating	Frame_Shift_Del	-
ATM_00274	ATM	Gilad et al. 1996b	p.(Arg 2505Thrfs*3)	c.7517_7520delGAGA	2505	Truncating	Frame_Shift_Del	-
ATM_00274	ATM	Gilad et al. 1996b	p.(Arg 2505Thrfs*3)	c.7517_7520delGAGA	2505	Truncating	Frame_Shift_Del	-
ATM_00274	ATM	Gilad et al. 1996b	p.(Arg 2505Thrfs*3)	c.7517_7520delGAGA	2505	Truncating	Frame_Shift_Del	-
ATM_00274	ATM	Gilad et al. 1996b	p.(Arg 2505Thrfs*3)	c.7517_7520delGAGA	2505	Truncating	Frame_Shift_Del	-
ATM_00274	ATM	Gilad et al. 1996b	p.(Arg 2505Thrfs*3)	c.7517_7520delGAGA	2505	Truncating	Frame_Shift_Del	-
ATM_00274	ATM	Gilad et al. 1996b	p.(Arg 2505Thrfs*3)	c.7517_7520delGAGA	2505	Truncating	Frame_Shift_Del	-
ATM_00274	ATM	Hacia et al. 1998	p.(Arg 2505Thrfs*3)	c.7517_7520delGAGA	2505	Truncating	Frame_Shift_Del	-
ATM_00274	ATM	Mitui et al. 2003	p.(Arg 2505Thrfs*3)	c.7517_7520delGAGA	2505	Truncating	Frame_Shift_Del	-
ATM_00274	ATM	Magliozzi et al. 2006	p.(Arg 2505Thrfs*3)	c.7517_7520delGAGA	2505	Truncating	Frame_Shift_Del	-
ATM_00274	ATM	Magliozzi et al. 2006	p.(Arg 2505Thrfs*3)	c.7517_7520delGAGA	2505	Truncating	Frame_Shift_Del	-
ATM_00274	ATM	Demuth et al. 2011	p.(Arg 2505Thrfs*3)	c.7517_7520delGAGA	2505	Truncating	Frame_Shift_Del	-
ATM_00274	ATM	Demuth et al. 2011	p.(Arg 2505Thrfs*3)	c.7517_7520delGAGA	2505	Truncating	Frame_Shift_Del	-
ATM_00274	ATM	Gilad et al. 1996b,Magliozzi et al. 2006	p.(R2506fs)	c.7517_7520delGAGA	2506	Truncating	Frame_Shift_Del	-
ATM_00275	ATM	Vorechovsky et al. 1996c	p.(Asp2507fs)	c.7518_7521del4	2507	Truncating	Frame_Shift_Del	-
ATM_00276	ATM	Li and Swift, 2000	p.(M2526*)	c.7578ins367	2526	Truncating	Nonsense_Mutation	-
ATM_00276	ATM	Li and Swift, 2000	p.(M2526*)	c.7578ins367	2526	Truncating	Nonsense_Mutation	-
ATM_00276	ATM	Li and Swift, 2000	p.(M2526*)	c.7578ins367	2526	Truncating	Nonsense_Mutation	-
ATM_00278	ATM	Li and Swift, 2000	p.(L2544*)	c.7630del11	2544	Truncating	Frame_Shift_Del	-
ATM_00281	ATM	Teraoka et al. 1999	p.(Asp2569*)	c.7705_7706delGA	2569	Truncating	Frame_Shift_Del	-
ATM_00281	ATM	Li and Swift, 2000	p.(Asp2569*)	c.7705_7706delGA	2569	Truncating	Frame_Shift_Del	-
ATM_00281	ATM	Mitui et al. 2003	p.(Asp2569*)	c.7705_7706delGA	2569	Truncating	Frame_Shift_Del	-
ATM_00282	ATM	Mitui et al. 2005	p.(Asp2569*)	c.7705_7718del14	2569	Truncating	Frame_Shift_Del	-
ATM_00282	ATM	Castellvi-Bel et al. 1999	p.(Asp2569*)	c.7705_7718del14	2569	Truncating	Frame_Shift_Del	-
ATM_00283	ATM	Wright et al. 1996	p.(Asp2597Lysfs*3)	c.7789-3T>G	2597	Truncating	Frame_Shift_Ins	exon 55 deleted in cDNA
ATM_00283	ATM	Magliozzi et al. 2006	p.(Asp2597Lysfs*3)	c.7789-3T>G	2597	Truncating	Frame_Shift_Ins	-
ATM_00283	ATM	Magliozzi et al. 2006	p.(Asp2597Lysfs*3)	c.7789-3T>G	2597	Truncating	Frame_Shift_Ins	-
ATM_00283	ATM	Mitui et al. 2003	p.(Asp2597Lysfs*3)	c.7789-3T>G	2597	Truncating	Frame_Shift_Ins	exon 55 deleted in cDNA
ATM_00283	ATM	Demuth et al. 2011	p.(Asp2597Lysfs*3)	c.7789-3T>G	2597	Truncating	Frame_Shift_Ins	exon 55 deleted in cDNA
ATM_00284	ATM	Wright et al. 1996	p.(Arg2598*)	c.7792C>T	2598	Truncating	Nonsense_Mutation	-
ATM_00284	ATM	Mitui et al. 2003	p.(Arg2598*)	c.7792C>T	2598	Truncating	Nonsense_Mutation	-
ATM_00285	ATM	Stankovic 1998	p.(R2610fs)	c.7829_7830delGA	2610	Truncating	Frame_Shift_Del	-
ATM_00286	ATM	Teraoka et al. 1999	p.(Ala2622Lysfs*3)	c.7865C>T	2622	Truncating	Frame_Shift_Ins	splice site created
ATM_00286	ATM	Teraoka et al. 1999	p.(Ala2622Lysfs*3)	c.7865C>T	2622	Truncating	Frame_Shift_Ins	splice site created
ATM_00287	ATM	Ejima and Sasaki, 1998	p.(Ile2629fs)	c.7885_7889delATATT	2629	Truncating	Frame_Shift_Del	-
ATM_00287	ATM	Ejima and Sasaki, 1998	p.(Ile2629fs)	c.7885_7889delATATT	2629	Truncating	Frame_Shift_Del	-
ATM_00287	ATM	Gilad et al. 1996b	p.(Ile2629fs)	c.7885_7889delATATT	2629	Truncating	Frame_Shift_Del	-
ATM_00287	ATM	Gilad et al. 1996b	p.(Ile2629fs)	c.7885_7889delATATT	2629	Truncating	Frame_Shift_Del	-
ATM_00287	ATM	Ejima and Sasaki, 1998	p.(Ile2629fs)	c.7885_7889delATATT	2629	Truncating	Frame_Shift_Del	-
ATM_00287	ATM	Mitui et al. 2003	p.(Ile2629fs)	c.7885_7889delATATT	2629	Truncating	Frame_Shift_Del	-
ATM_00287	ATM	Stankovic et al. 1998	p.(Ile2629fs)	c.7885_7889delATATT	2629	Truncating	Frame_Shift_Del	-
ATM_00287	ATM	Gilad et al. 1996b	p.(Ile2629fs)	c.7885_7889delATATT	2629	Truncating	Frame_Shift_Del	-
ATM_00289	ATM	Stankovic 1998	p.(K2643*)	c.7928del83	2643	Truncating	Frame_Shift_Del	-
ATM_00293	ATM	Stankovic 1998	p.(Glu2668fs)	c.8004_8016del13	2668	Truncating	Frame_Shift_Del	Crosses and exon boundary and may be an aberrant splice caused by an unidentified mutation
ATM_00294	ATM	Stankovic 1998	p.(Lys2700*)	c.8098A>T	2700	Truncating	Nonsense_Mutation	-
ATM_00295	ATM	Gilad et al. 1996b	p.(Gln2714*)	c.8140C>T	2714	Truncating	Nonsense_Mutation	-
ATM_00295	ATM	Gilad et al. 1996b	p.(Gln2714*)	c.8140C>T	2714	Truncating	Nonsense_Mutation	-
ATM_00298	ATM	Byrd et al. 1996,_x001A__x001A_Stankovic 1998	p.(Asn2736fs)	c.8207_8208insAA	2736	Truncating	Frame_Shift_Ins	-
ATM_00299	ATM	Telatar et al. 1996,_x001A__x001A_Hacia et al. 1998	p.(Lys2756*)	c.8266A>T	2756	Truncating	Nonsense_Mutation	-
ATM_00299	ATM	Telatar et al. 1996	p.(Lys2756*)	c.8266A>T	2756	Truncating	Nonsense_Mutation	-
ATM_00299	ATM	Teraoka et al. 1999	p.(Lys2756*)	c.8266A>T	2756	Truncating	Nonsense_Mutation	-
ATM_00299	ATM	Telatar et al. 1996,_x001A__x001A_Buzin et al. 2003	p.(Lys2756*)	c.8266A>T	2756	Truncating	Nonsense_Mutation	-
ATM_00299	ATM	Stankovic 1998	p.(Lys2756*)	c.8266A>T	2756	Truncating	Nonsense_Mutation	-
ATM_00300	ATM	Wright et al. 1996	p.(Val2757_Glu2807del50)	c.8418+1_8418+4delGTGA	2757	Truncating	LARGE_DEL	-
ATM_00300	ATM	Stankovic 1998	p.(Val2757_Glu2807del50)	c.8418+1_8418+4delGTGA	2757	Truncating	LARGE_DEL	-
ATM_00300	ATM	Buzin et al 2003	p.(Val2757_Glu2807del50)	c.8418+1_8418+4delGTGA	2757	Truncating	LARGE_DEL	-
ATM_00300	ATM	Wright et al. 1996,_x001A__x001A_Hacia et al. 1998	p.(Val2757_Glu2807del50)	c.8418+1_8418+4delGTGA	2757	Truncating	LARGE_DEL	-
ATM_00300	ATM	Li and Swift, 2000	p.(Val2757_Glu2807del50)	c.8418+1_8418+4delGTGA	2757	Truncating	LARGE_DEL	-
ATM_00300	ATM	Li and Swift, 2000	p.(Val2757_Glu2807del50)	c.8418+1_8418+4delGTGA	2757	Truncating	LARGE_DEL	-
ATM_00300	ATM	Li and Swift, 2000	p.(Val2757_Glu2807del50)	c.8418+1_8418+4delGTGA	2757	Truncating	LARGE_DEL	-
ATM_00300	ATM	Li and Swift, 2000	p.(Val2757_Glu2807del50)	c.8418+1_8418+4delGTGA	2757	Truncating	LARGE_DEL	-
ATM_00301	ATM	Gilad et al. 1996b	p.(Val2757_Glu2807del50)	c.8269del150	2757	Truncating	LARGE_DEL	-
ATM_00426	ATM	Magliozzi et al. 2006	p.(Leu43Pro)	c.128T>C	43	Missense	Missense_Mutation	-
ATM_00372	ATM	Angele et al. 2003	p.(Asp126Glu)	c.378T>A	126	Missense	Missense_Mutation	-
ATM_00372	ATM	Angele et al. 2003	p.(Asp126Glu)	c.378T>A	126	Missense	Missense_Mutation	-
ATM_00027	ATM	Li and Swift, 2000	p.(Lys224Glu)	c.670A>G	224	Missense	Missense_Mutation	-
ATM_00429	ATM	Magliozzi et al. 2006	p.(His231Arg)	c.692A>G	231	Missense	Missense_Mutation	-
ATM_00035	ATM	Becker-Catania et al. 2000	p.(Pro292Leu)	c.875C>T	292	Missense	Missense_Mutation	-
ATM_00035	ATM	Stankovic 1998	p.(Pro292Leu)	c.875C>T	292	Missense	Missense_Mutation	-
ATM_00393	ATM	Coutinho et al. 2005	p.(Gly301Ser)	c.901G>A	301	Missense	Missense_Mutation	exon 9 deleted in cDNA
ATM_00039	ATM	Li and Swift, 2000	p.(Ile323Val)	c.967A>G	323	Missense	Missense_Mutation	-
ATM_00357	ATM	Mitui et al. 2003	p.(Trp412Ser)	c.1235G>C	412	Missense	Missense_Mutation	aberrant splicing noted but not specified
ATM_00392	ATM	Jiang et al. 2006	p.(Gly449Ala)	c.1346G>C	449	Missense	Missense_Mutation	-
ATM_00392	ATM	Jiang et al. 2006	p.(Gly449Ala)	c.1346G>C	449	Missense	Missense_Mutation	-
ATM_00091	ATM	Sandoval 1999	p.(Phe570Ser)	c.1709T>C	570	Missense	Missense_Mutation	-
ATM_00134	ATM	Stankovic 1998	p.(Asn768Asp)	c.2302A>G	768	Missense	Missense_Mutation	-
ATM_00092	ATM	Sandoval 1999	p.(Arg785Cys)	c.2353C>T	785	Missense	Missense_Mutation	-
ATM_00431	ATM	Magliozzi et al. 2006	p.(Pro795Thr)	c.2383C>A	795	Missense	Missense_Mutation	-
ATM_00421	ATM	Teraoka et al. 1999,_x001A__x001A_Buzin et al. 2003	p.(Leu950Arg)	c.2849T>G	950	Missense	Missense_Mutation	-
ATM_00152	ATM	Stankovic 1998	p.(L1001Q)	c.3002T>A	1001	Missense	Missense_Mutation	-
ATM_00422	ATM	Buzin et al. 2003	p.(His1083Arg)	c.3248A>G	1083	Missense	Missense_Mutation	-
ATM_00416	ATM	Teraoka et al. 1999	p.(Leu1283Pro)	c.3848T>C	1283	Missense	Missense_Mutation	-
ATM_00174	ATM	Li and Swift, 2000	p.(Leu1420Phe)	c.4258C>T	1420	Missense	Missense_Mutation	-
ATM_00177	ATM	Izatt et al. 1999	p.(Leu1465Pro)	c.4394T>C	1465	Missense	Missense_Mutation	-
ATM_00110	ATM	Broeks et al. 1998	p.(Pro1566Arg)	c.4697C>G	1566	Missense	Missense_Mutation	-
ATM_00194	ATM	Stankovic 1998	p.(Ser1691Arg)	c.5071A>C	1691	Missense	Missense_Mutation	-
ATM_00485	ATM	Verhagen et al. 2011,Netherlands:Amsterdam	p.(Ala1733Pro)	c.5197G>C	1733	Missense	Missense_Mutation	-
ATM_00197	ATM	Stankovic 1998	p.(Thr1743Ile)	c.5228C>T	1743	Missense	Missense_Mutation	-
ATM_00197	ATM	Stankovic 1998	p.(Thr1743Ile)	c.5228C>T	1743	Missense	Missense_Mutation	-
ATM_00410	ATM	Cavalieri et al. 2006	p.(Leu1824Pro)	c.5471T>C	1824	Missense	Missense_Mutation	-
ATM_00218	ATM	Sandoval 1999	p.(Val1913Gly)	c.5738T>G	1913	Missense	Missense_Mutation	-
ATM_00231	ATM	Sandoval 1999	p.(Asp2016Gly)	c.6047A>G	2016	Missense	Missense_Mutation	-
ATM_00231	ATM	Babaei et al. 2005	p.(Asp2016Gly)	c.6047A>G	2016	Missense	Missense_Mutation	-
ATM_00231	ATM	Babaei et al. 2005	p.(Asp2016Gly)	c.6047A>G	2016	Missense	Missense_Mutation	-
ATM_00231	ATM	Castellvi-Bel et al. 1999	p.(Asp2016Gly)	c.6047A>G	2016	Missense	Missense_Mutation	-
ATM_00231	ATM	Demuth et al. 2011	p.(Asp2016Gly)	c.6047A>G	2016	Missense	Missense_Mutation	-
ATM_00237	ATM	Teraoka et al. 1999	p.(Glu2052Lys)	c.6154G>A	2052	Missense	Missense_Mutation	exon 44 deleted in cDNA
ATM_00237	ATM	Teraoka et al. 1999	p.(Glu2052Lys)	c.6154G>A	2052	Missense	Missense_Mutation	exon 44 deleted in cDNA
ATM_00238	ATM	Becker-Catania et al. 2000	p.(Gly2063Glu)	c.6188G>A	2063	Missense	Missense_Mutation	-
ATM_00238	ATM	Becker-Catania et al. 2000	p.(Gly2063Glu)	c.6188G>A	2063	Missense	Missense_Mutation	-
ATM_00238	ATM	Becker-Catania et al. 2000	p.(Gly2063Glu)	c.6188G>A	2063	Missense	Missense_Mutation	-
ATM_00238	ATM	Becker-Catania et al. 2000	p.(Gly2063Glu)	c.6188G>A	2063	Missense	Missense_Mutation	-
ATM_00243	ATM	Sandoval 1999	p.(Ala2067Asp)	c.6200C>A	2067	Missense	Missense_Mutation	-
ATM_00256	ATM	Sandoval 1999	p.(Arg2227Cys)	c.6679C>T	2227	Missense	Missense_Mutation	-
ATM_00256	ATM	Becker-Catania et al. 2000	p.(Arg2227Cys)	c.6679C>T	2227	Missense	Missense_Mutation	-
ATM_00256	ATM	Li and Swift, 2000	p.(Arg2227Cys)	c.6679C>T	2227	Missense	Missense_Mutation	-
ATM_00256	ATM	Jiang et al. 2006	p.(Arg2227Cys)	c.6679C>T	2227	Missense	Missense_Mutation	-
ATM_00256	ATM	Babaei et al. 2005	p.(Arg2227Cys)	c.6679C>T	2227	Missense	Missense_Mutation	-
ATM_00256	ATM	Buzin et al. 2003	p.(Arg2227Cys)	c.6679C>T	2227	Missense	Missense_Mutation	-
ATM_00269	ATM	Stankovic 1998	p.(V2424G)	c.7271T>G	2424	Missense	Missense_Mutation	-
ATM_00269	ATM	Stankovic 1998	p.(V2424G)	c.7271T>G	2424	Missense	Missense_Mutation	-
ATM_00269	ATM	Stankovic 1998	p.(V2424G)	c.7271T>G	2424	Missense	Missense_Mutation	-
ATM_00272	ATM	Sandoval 1999	p.(Tyr2470Asp)	c.7408T>G	2470	Missense	Missense_Mutation	-
ATM_00280	ATM	Stankovic 1998	p.(His2554Asp)	c.7660C>G	2554	Missense	Missense_Mutation	-
ATM_00286	ATM	Castellvi-Bel et al. 1999	p.(Ala2622Val)	c.7865C>T	2622	Truncating	Frame_Shift_Ins	-
ATM_00288	ATM	Wright et al. 1996	p.(Arg2642Ser)	c.7926A>C	2642	Missense	Missense_Mutation	deletion of both exons 54 and 55 or just 55 observed in cDNA
ATM_00290	ATM	Toyoshima et al. 1998	p.(Leu2656Pro)	c.7967T>C	2656	Missense	Missense_Mutation	-
ATM_00292	ATM	Stankovic 1998	p.(Glu2668Gly)	c.8003A>G	2668	Missense	Missense_Mutation	-
ATM_00052	ATM	Saviozzi et al. 2002	p.(Tyr2677Cys)	c.8030A>G	2677	Missense	Missense_Mutation	-
ATM_00363	ATM	Mitui et al. 2003	p.(Thr2682Ser)	c.8045C>G	2682	Missense	Missense_Mutation	-
ATM_00335	ATM	Mitui et al. 2003	p.(Lys2700Asn)	c.8100A>T	2700	Missense	Missense_Mutation	-
ATM_00355	ATM	Mitui et al. 2003	p.(Ile2702Arg)	c.8105T>G	2702	Missense	Missense_Mutation	-
ATM_00479	ATM	Demuth et al. 2011	p.(Cys2704Arg)	c.8110T>C	2704	Missense	Missense_Mutation	-
ATM_00409	ATM	Cavalieri et al. 2006	p.(Asp2708Gln)	c.8122G>A	2708	Missense	Missense_Mutation	-
ATM_00409	ATM	Cavalieri et al. 2006,Magliozzi et al. 2006	p.(Asp2708Gln)	c.8122G>A	2708	Missense	Missense_Mutation	-
ATM_00473	ATM	Netherlands:Amsterdam	p.(Val2716Ala)	c.8147T>C	2716	Missense	Missense_Mutation	-
ATM_00473	ATM	Netherlands:Amsterdam	p.(Val2716Ala)	c.8147T>C	2716	Missense	Missense_Mutation	-
ATM_00473	ATM	Demuth et al. 2011	p.(Val2716Ala)	c.8147T>C	2716	Missense	Missense_Mutation	-
ATM_00473	ATM	Demuth et al. 2011	p.(Val2716Ala)	c.8147T>C	2716	Missense	Missense_Mutation	-
ATM_00296	ATM	Wright et al. 1996	p.(Lys2717Thr)	c.8150A>G	2717	Missense	Missense_Mutation	exon 57 deleted in cDNA
ATM_00364	ATM	Mitui et al. 2003	p.(Lys2717Thr)	c.8150A>C	2717	Missense	Missense_Mutation	aberrant splicing
ATM_00297	ATM	Mitui et al. 2003	p.(Ala2726Val)	c.8177C>T	2726	Missense	Missense_Mutation	-
ATM_00297	ATM	Castellvi-Bel et al. 1999	p.(Ala2726Val)	c.8177C>T	2726	Missense	Missense_Mutation	-
ATM_00306	ATM	Watters et al. 1997	p.(Cys2824Tyr)	c.8471G>A	2824	Missense	Missense_Mutation	-
ATM_00308	ATM	Lakin et al. 1996,_x001A__x001A_Byrd et al. 1996	p.(Phe2827Cys)	c.8480T>G	2827	Missense	Missense_Mutation	-
ATM_00309	ATM	Becker-Catania et al. 2000	p.(Arg2832Cys)	c.8494C>T	2832	Missense	Missense_Mutation	-
ATM_00309	ATM	Becker-Catania et al. 2000	p.(Arg2832Cys)	c.8494C>T	2832	Missense	Missense_Mutation	-
ATM_00309	ATM	Becker-Catania et al. 2000	p.(Arg2832Cys)	c.8494C>T	2832	Missense	Missense_Mutation	-
ATM_00309	ATM	Li and Swift, 2000	p.(Arg2832Cys)	c.8494C>T	2832	Missense	Missense_Mutation	-
ATM_00309	ATM	Li and Swift, 2000	p.(Arg2832Cys)	c.8494C>T	2832	Missense	Missense_Mutation	-
ATM_00309	ATM	Li and Swift, 2000	p.(Arg2832Cys)	c.8494C>T	2832	Missense	Missense_Mutation	-
ATM_00309	ATM	Telatar et al. 1998	p.(Arg2832Cys)	c.8494C>T	2832	Missense	Missense_Mutation	-
ATM_00108	ATM	Sandoval 1999	p.(Arg2849Pro)	c.8546G>C	2849	Missense	Missense_Mutation	-
ATM_00312	ATM	Castellvi-Bel et al. 1999	p.(Ser2855Arg)	c.8565T>A	2855	Missense	Missense_Mutation	-
ATM_00107	ATM	Sandoval 1999	p.(Gly2867Arg)	c.8599G>C	2867	Missense	Missense_Mutation	-
ATM_00107	ATM	Baumer et al. 1996	p.(Gly2867Arg)	c.8599G>C	2867	Missense	Missense_Mutation	-
ATM_00371	ATM	Babaei et al. 2005	p.(Ile2878Arg)	c.8633T>G	2878	Missense	Missense_Mutation	-
ATM_00371	ATM	Netherlands:Amsterdam	p.(Ile2878Arg)	c.8633T>G	2878	Missense	Missense_Mutation	-
ATM_00315	ATM	Gilad et al. 1996b	p.(Glu2904Gly)	c.8711A>G	2904	Missense	Missense_Mutation	-
ATM_00315	ATM	Gilad et al. 1996b	p.(Glu2904Gly)	c.8711A>G	2904	Missense	Missense_Mutation	-
ATM_00376	ATM	Coutinho et al. 2004	p.(Arg2909Thr)	c.8726G>C	2909	Missense	Missense_Mutation	-
ATM_00330	ATM	Li and Swift, 2000	p.(Arg3008Cys)	c.9022C>T	3008	Missense	Missense_Mutation	-
ATM_00330	ATM	Angele et al. 2003	p.(Arg3008Cys)	c.9022C>T	3008	Missense	Missense_Mutation	-
ATM_00330	ATM	Angele et al. 2003	p.(Arg3008Cys)	c.9022C>T	3008	Missense	Missense_Mutation	-
ATM_00330	ATM	Wright et al. 1996,_x001A__x001A_Hacia et al. 1998	p.(Arg3008Cys)	c.9022C>T	3008	Missense	Missense_Mutation	-
ATM_00402	ATM	Cavalieri et al. 2006	p.(Leu3035Phe)	c.9103C>T	3035	Missense	Missense_Mutation	-
ATM_00302	ATM	Gilad et al. 1996b	p.(V2758*)	c.8269del403	2758	Truncating	Frame_Shift_Del	-
ATM_00302	ATM	Gilad et al. 1996b	p.(V2758*)	c.8269del403	2758	Truncating	Frame_Shift_Del	-
ATM_00303	ATM	Gilad et al. 1996b	p.(Gln2762fs)	c.8283_8284delTC	2762	Truncating	Frame_Shift_Del	-
ATM_00304	ATM	Gilad et al. 1996b	p.(Trp2769*)	c.8307G>A	2769	Truncating	Nonsense_Mutation	-
ATM_00305	ATM	Stankovic 1998	p.(Lys2803fs)	c.8408_8408delA	2803	Truncating	Frame_Shift_Del	-
ATM_00305	ATM	Stankovic 1998	p.(Lys2803fs)	c.8408_8408delA	2803	Truncating	Frame_Shift_Del	-
ATM_00307	ATM	Stankovic 1998	p.(Phe2827fs)	c.8478_8479insAA	2827	Truncating	Frame_Shift_Ins	-
ATM_00310	ATM	Mitui et al. 2005	p.(Arg2849*)	c.8545C>T	2849	Truncating	Nonsense_Mutation	-
ATM_00310	ATM	Mitui et al. 2005	p.(Arg2849*)	c.8545C>T	2849	Truncating	Nonsense_Mutation	-
ATM_00310	ATM	Castellvi-Bel et al. 1999	p.(Arg2849*)	c.8545C>T	2849	Truncating	Nonsense_Mutation	-
ATM_00314	ATM	Teraoka et al. 1999	p.(del29	c.8585-14del27	29	Truncating	LARGE_DEL	-
ATM_00314	ATM	Teraoka et al. 1999	p.(del29	c.8585-14del27	29	Truncating	LARGE_DEL	-
ATM_00316	ATM	Telatar et al. 1998	p.(Val2923fs)	c.8766_8767insT	2923	Truncating	Frame_Shift_Ins	-
ATM_00317	ATM	Teraoka et al. 1999	p.(Glu2924*)	c.8769_8770insT	2924	Truncating	Nonsense_Mutation	-
ATM_00319	ATM	Li and Swift, 2000	p.(Met2935fs)	c.8802_8802delC	2935	Truncating	Frame_Shift_Del	-
ATM_00320	ATM	Telatar et al. 1996	p.(Gln2942fs)	c.8822_8823ins4	2942	Truncating	Frame_Shift_Ins	-
ATM_00321	ATM	Telatar et al. 1996	p.(Leu2945fs)	c.8833_8834delCT	2945	Truncating	Frame_Shift_Del	-
ATM_00321	ATM	Li and Swift, 2000	p.(Leu2945fs)	c.8833_8834delCT	2945	Truncating	Frame_Shift_Del	-
ATM_00321	ATM	Magliozzi et al. 2006	p.(Leu2945fs)	c.8833_8834delCT	2945	Truncating	Frame_Shift_Del	-
ATM_00322	ATM	Buzin et al 2003	p.(?)	c.8987+1G>T	2995	Truncating	Frame_Shift_Ins	-
ATM_00322	ATM	Castellvi-Bel et al. 1999	p.(?)	c.8987+1G>T	2995	Truncating	Frame_Shift_Ins	-
ATM_00323	ATM	Li and Swift, 2000	p.(Trp2960*)	c.8879G>A	2960	Truncating	Nonsense_Mutation	-
ATM_00324	ATM	Savitsky et al. 1995a	p.(Thr2983fs)	c.8946_8947insA	2983	Truncating	Frame_Shift_Ins	-
ATM_00324	ATM	Savitsky et al. 1995a	p.(Thr2983fs)	c.8946_8947insA	2983	Truncating	Frame_Shift_Ins	-
ATM_00325	ATM	Vorechovsky et al. 1996c	p.(Arg2993*)	c.8977C>T	2993	Truncating	Nonsense_Mutation	-
ATM_00325	ATM	Li and Swift, 2000	p.(Arg2993*)	c.8977C>T	2993	Truncating	Nonsense_Mutation	-
ATM_00325	ATM	Li and Swift, 2000	p.(Arg2993*)	c.8977C>T	2993	Truncating	Nonsense_Mutation	-
ATM_00325	ATM	Magliozzi et al. 2006	p.(Arg2993*)	c.8977C>T	2993	Truncating	Nonsense_Mutation	-
ATM_00325	ATM	Magliozzi et al. 2006	p.(Arg2993*)	c.8977C>T	2993	Truncating	Nonsense_Mutation	-
ATM_00325	ATM	Mitui et al. 2003	p.(Arg2993*)	c.8977C>T	2993	Truncating	Nonsense_Mutation	-
ATM_00325	ATM	Mitui et al. 2003	p.(Arg2993*)	c.8977C>T	2993	Truncating	Nonsense_Mutation	-
ATM_00325	ATM	Mitui et al. 2003	p.(Arg2993*)	c.8977C>T	2993	Truncating	Nonsense_Mutation	-
ATM_00325	ATM	Mitui et al. 2003	p.(Arg2993*)	c.8977C>T	2993	Truncating	Nonsense_Mutation	-
ATM_00325	ATM	Mitui et al. 2003	p.(Arg2993*)	c.8977C>T	2993	Truncating	Nonsense_Mutation	-
ATM_00325	ATM	Mitui et al. 2003	p.(Arg2993*)	c.8977C>T	2993	Truncating	Nonsense_Mutation	-
ATM_00325	ATM	Mitui et al. 2003	p.(Arg2993*)	c.8977C>T	2993	Truncating	Nonsense_Mutation	-
ATM_00325	ATM	Mitui et al. 2003	p.(Arg2993*)	c.8977C>T	2993	Truncating	Nonsense_Mutation	-
ATM_00326	ATM	Teraoka et al. 1999,_x001A__x001A_Mitui et al. 2003	p.(S2996fs)	c.8988-1G>C	2996	Truncating	Frame_Shift_Ins	-
ATM_00327	ATM	Gilad et al. 1996b	p.(Ser3001fs)	c.9001_9002delAG	3001	Truncating	Frame_Shift_Del	-
ATM_00327	ATM	Gilad et al. 1996b	p.(Ser3001fs)	c.9001_9002delAG	3001	Truncating	Frame_Shift_Del	-
ATM_00327	ATM	Broeks et al. 1998	p.(Ser3001fs)	c.9001_9002delAG	3001	Truncating	Frame_Shift_Del	-
ATM_00327	ATM	Broeks et al. 1998	p.(Ser3001fs)	c.9001_9002delAG	3001	Truncating	Frame_Shift_Del	-
ATM_00328	ATM	Li and Swift, 2000	p.(Phe3002fs)	c.9003_9005delTTTinsC	3002	Truncating	Frame_Shift_Del	-
ATM_00329	ATM	Mitui et al. 2003	p.(Lys3004fs)	c.9010_9037del28	3004	Truncating	Frame_Shift_Del	-
ATM_00329	ATM	Mitui et al. 2003	p.(Lys3004fs)	c.9010_9037del28	3004	Truncating	Frame_Shift_Del	-
ATM_00329	ATM	Mitui et al. 2003	p.(Lys3004fs)	c.9010_9037del28	3004	Truncating	Frame_Shift_Del	-
ATM_00329	ATM	Mitui et al. 2003	p.(Lys3004fs)	c.9010_9037del28	3004	Truncating	Frame_Shift_Del	-
ATM_00329	ATM	Mitui et al. 2003	p.(Lys3004fs)	c.9010_9037del28	3004	Truncating	Frame_Shift_Del	-
ATM_00329	ATM	Mitui et al. 2003	p.(Lys3004fs)	c.9010_9037del28	3004	Truncating	Frame_Shift_Del	-
ATM_00329	ATM	Castellvi-Bel et al. 1999	p.(Lys3004fs)	c.9010_9037del28	3004	Truncating	Frame_Shift_Del	-
ATM_00331	ATM	Li and Swift, 2000	p.(Phe3049fs)	c.9145_9146delTT	3049	Truncating	Frame_Shift_Del	-
ATM_00332	ATM	Gilad et al. 1996b	p.(*terS)	c.9170G>C	3056	Truncating	Stop_Codon	29 amino acid extension due to mutation of stop codon
ATM_00332	ATM	Gilad et al. 1996b	p.(*terS)	c.9170G>C	3056	Truncating	Stop_Codon	29 amino acid extension due to mutation of stop codon
ATM_00333	ATM	Mitui et al. 2003	p.(Trp1279*)	c.3836G>A	1279	Truncating	Nonsense_Mutation	-
ATM_00334	ATM	Mitui et al. 2003	p.(Phe239fs)	c.716_716delT	239	Truncating	Frame_Shift_Del	-
ATM_00334	ATM	Mitui et al. 2003	p.(Phe239fs)	c.716_716delT	239	Truncating	Frame_Shift_Del	-
ATM_00336	ATM	Mitui et al. 2003	p.(Ile2702fs)	c.8103_8104delAA	2702	Truncating	Frame_Shift_Del	-
ATM_00337	ATM	Mitui et al. 2003	p.(*3056Pheext*4)	c.9170_9171delGA	3056	Truncating	Stop_Codon	-
ATM_00338	ATM	Mitui et al. 2003	p.(Asp2959fs)	c.8876_8879delACTG	2959	Truncating	Frame_Shift_Del	-
ATM_00338	ATM	Mitui et al. 2003	p.(Asp2959fs)	c.8876_8879delACTG	2959	Truncating	Frame_Shift_Del	-
ATM_00339	ATM	Mitui et al. 2003	p.(Ile1332Alafs*11)	c.3994-1413del3450	1332	Truncating	Frame_Shift_Del	-
ATM_00339	ATM	Mitui et al. 2003	p.(Ile1332Alafs*11)	c.3994-1413del3450	1332	Truncating	Frame_Shift_Del	-
ATM_00339	ATM	Mitui et al. 2003	p.(Ile1332Alafs*11)	c.3994-1413del3450	1332	Truncating	Frame_Shift_Del	-
ATM_00339	ATM	Mitui et al. 2003	p.(Ile1332Alafs*11)	c.3994-1413del3450	1332	Truncating	Frame_Shift_Del	-
ATM_00339	ATM	Mitui et al. 2003	p.(Ile1332Alafs*11)	c.3994-1413del3450	1332	Truncating	Frame_Shift_Del	-
ATM_00339	ATM	Mitui et al. 2003	p.(Ile1332Alafs*11)	c.3994-1413del3450	1332	Truncating	Frame_Shift_Del	-
ATM_00339	ATM	Mitui et al. 2003	p.(Ile1332Alafs*11)	c.3994-1413del3450	1332	Truncating	Frame_Shift_Del	-
ATM_00339	ATM	Mitui et al. 2003	p.(Ile1332Alafs*11)	c.3994-1413del3450	1332	Truncating	Frame_Shift_Del	-
ATM_00339	ATM	Mitui et al. 2003	p.(Ile1332Alafs*11)	c.3994-1413del3450	1332	Truncating	Frame_Shift_Del	-
ATM_00339	ATM	Demuth et al. 2011	p.(Ile1332Alafs*11)	c.3994-1413del3450	1332	Truncating	Frame_Shift_Del	-
ATM_00339	ATM	Demuth et al. 2011	p.(Ile1332Alafs*11)	c.3994-1413del3450	1332	Truncating	Frame_Shift_Del	-
ATM_00340	ATM	Teraoka et al. 1999,_x001A__x001A_Mitui et al. 2003	p.(Arg1882*)	c.5644C>T	1882	Truncating	Nonsense_Mutation	-
ATM_00340	ATM	Mitui et al. 2003	p.(Arg1882*)	c.5644C>T	1882	Truncating	Nonsense_Mutation	-
ATM_00340	ATM	Mitui et al. 2003	p.(Arg1882*)	c.5644C>T	1882	Truncating	Nonsense_Mutation	-
ATM_00341	ATM	Mitui et al. 2003	p.(Gln2762fs)	c.8283_8284delTC	2762	Truncating	Frame_Shift_Del	-
ATM_00341	ATM	Mitui et al. 2003	p.(Gln2762fs)	c.8283_8284delTC	2762	Truncating	Frame_Shift_Del	-
ATM_00343	ATM	Mitui et al. 2003	p.(Val2115fs)	c.[6342_6343insC;6347_6347+1delGG]	2115	Truncating	Frame_Shift_Del	-
ATM_00344	ATM	Mitui et al. 2003	p.(Gln1225*)	c.3673C>T	1225	Truncating	Nonsense_Mutation	-
ATM_00344	ATM	Mitui et al. 2003	p.(Gln1225*)	c.3673C>T	1225	Truncating	Nonsense_Mutation	-
ATM_00345	ATM	Mitui et al. 2003	p.(Gln1970*)	c.5908C>T	1970	Truncating	Nonsense_Mutation	-
ATM_00345	ATM	Mitui et al. 2003	p.(Gln1970*)	c.5908C>T	1970	Truncating	Nonsense_Mutation	-
ATM_00346	ATM	Teraoka et al. 1999,_x001A__x001A_Mitui et al. 2005	p.(Arg248*)	c.742C>T	248	Truncating	Nonsense_Mutation	-
ATM_00346	ATM	Mitui et al. 2005	p.(Arg248*)	c.742C>T	248	Truncating	Nonsense_Mutation	-
ATM_00347	ATM	Mitui et al. 2005	p.(Arg3008fs)	c.9021_9022insA	3008	Truncating	Frame_Shift_Ins	-
ATM_00347	ATM	Mitui et al. 2005	p.(Arg3008fs)	c.9021_9022insA	3008	Truncating	Frame_Shift_Ins	-
ATM_00348	ATM	Mitui et al. 2003	p.(Tyr370*)	c.1110C>G	370	Truncating	Nonsense_Mutation	-
ATM_00349	ATM	Teraoka et al. 1999,_x001A__x001A_Mitui et al. 2003	p.(Leu1162*)	c.3485T>G	1162	Truncating	Nonsense_Mutation	-
ATM_00350	ATM	Mitui et al. 2003	p.(Trp2638*)	c.7913G>A	2638	Truncating	Nonsense_Mutation	-
ATM_00350	ATM	Mitui et al. 2003	p.(Trp2638*)	c.7913G>A	2638	Truncating	Nonsense_Mutation	-
ATM_00350	ATM	Coutinho et al. 2004	p.(Trp2638*)	c.7913G>A	2638	Truncating	Nonsense_Mutation	-
ATM_00350	ATM	Coutinho et al. 2004	p.(Trp2638*)	c.7913G>A	2638	Truncating	Nonsense_Mutation	-
ATM_00350	ATM	Coutinho et al. 2004	p.(Trp2638*)	c.7913G>A	2638	Truncating	Nonsense_Mutation	-
ATM_00350	ATM	Demuth et al. 2011	p.(Trp2638*)	c.7913G>A	2638	Truncating	Nonsense_Mutation	-
ATM_00350	ATM	Demuth et al. 2011	p.(Trp2638*)	c.7913G>A	2638	Truncating	Nonsense_Mutation	-
ATM_00351	ATM	Mitui et al. 2003	p.(Leu1335fs)	c.4002_4005delCTTA	1335	Truncating	Frame_Shift_Del	-
ATM_00352	ATM	Mitui et al. 2003	p.(Lys1435*)	c.4303A>T	1435	Truncating	Nonsense_Mutation	-
ATM_00353	ATM	Mitui et al. 2003	p.(Gln2874*)	c.8620C>T	2874	Truncating	Nonsense_Mutation	-
ATM_00354	ATM	Mitui et al. 2003	p.(Gln1578*)	c.4732C>T	1578	Truncating	Nonsense_Mutation	-
ATM_00356	ATM	Mitui et al. 2003	p.(?)	c.901+1G>A	300	Truncating	Frame_Shift_Ins	aberrant splicing noted but not specified
ATM_00358	ATM	Mitui et al. 2003	p.(Glu450fs)	c.1348_1348delG	450	Truncating	Frame_Shift_Del	-
ATM_00358	ATM	Mitui et al. 2003	p.(Glu450fs)	c.1348_1348delG	450	Truncating	Frame_Shift_Del	-
ATM_00359	ATM	Mitui et al. 2003	p.(Glu1856*)	c.5566G>T	1856	Truncating	Nonsense_Mutation	-
ATM_00360	ATM	Mitui et al. 2003	p.(?)	c.2839-3_2839-1delinsGATACTA	946	Truncating	Frame_Shift_Ins	aberrant splicing indicated but not the affected exons
ATM_00361	ATM	Mitui et al. 2003	p.(?)	c.4437-1G>C	1479	Truncating	Frame_Shift_Ins	aberrant splicing
ATM_00361	ATM	Mitui et al. 2003	p.(?)	c.4437-1G>C	1479	Truncating	Frame_Shift_Ins	aberrant splicing
ATM_00362	ATM	Mitui et al. 2003	p.(Glu1593*)	c.4777G>T	1593	Truncating	Nonsense_Mutation	aberrant splicing
ATM_00362	ATM	Mitui et al. 2003	p.(Glu1593*)	c.4777G>T	1593	Truncating	Nonsense_Mutation	aberrant splicing
ATM_00362	ATM	Birrell et al. 2005	p.(Glu1593*)	c.4777G>T	1593	Truncating	Nonsense_Mutation	aberrant splicing
ATM_00365	ATM	Mitui et al. 2003	p.(Gln2729*)	c.8185C>T	2729	Truncating	Nonsense_Mutation	-
ATM_00365	ATM	Mitui et al. 2003	p.(Gln2729*)	c.8185C>T	2729	Truncating	Nonsense_Mutation	-
ATM_00366	ATM	Babaei et al. 2005	p.Glu160fs	c.513C>T	160	Truncating	Frame_Shift_Ins	-
ATM_00366	ATM	Babaei et al. 2005	p.Glu160fs	c.513C>T	160	Truncating	Frame_Shift_Ins	-
ATM_00367	ATM	Babaei et al. 2005	p.(Val835fs)	c.2502_2503insA	835	Truncating	Frame_Shift_Ins	-
ATM_00367	ATM	Babaei et al. 2005	p.(Val835fs)	c.2502_2503insA	835	Truncating	Frame_Shift_Ins	-
ATM_00368	ATM	Babaei et al. 2005	p.(Phe1074fs)	c.3219_3219delA	1074	Truncating	Frame_Shift_Del	-
ATM_00368	ATM	Babaei et al. 2005	p.(Phe1074fs)	c.3219_3219delA	1074	Truncating	Frame_Shift_Del	-
ATM_00369	ATM	Babaei et al. 2005	p.(Arg1618*)	c.4852C>T	1618	Truncating	Nonsense_Mutation	-
ATM_00369	ATM	Babaei et al. 2005	p.(Arg1618*)	c.4852C>T	1618	Truncating	Nonsense_Mutation	-
ATM_00369	ATM	Babaei et al. 2005	p.(Arg1618*)	c.4852C>T	1618	Truncating	Nonsense_Mutation	-
ATM_00370	ATM	Babaei et al. 2005	p.(Met2734fs)	c.8201-8211del11ins6	2734	Truncating	Frame_Shift_Del	-
ATM_00370	ATM	Babaei et al. 2005	p.(Met2734fs)	c.8201-8211del11ins6	2734	Truncating	Frame_Shift_Del	-
ATM_00370	ATM	Babaei et al. 2005	p.(Met2734fs)	c.8201-8211del11ins6	2734	Truncating	Frame_Shift_Del	-
ATM_00370	ATM	Babaei et al. 2005	p.(Met2734fs)	c.8201-8211del11ins6	2734	Truncating	Frame_Shift_Del	-
ATM_00373	ATM	Babaei et al. 2005	p.(Phe1877fs)	c.[5631_5635delCTCGC;5639_5640insA]	1877	Truncating	Frame_Shift_Del	-
ATM_00373	ATM	Babaei et al. 2005	p.(Phe1877fs)	c.[5631_5635delCTCGC;5639_5640insA]	1877	Truncating	Frame_Shift_Del	-
ATM_00374	ATM	Coutinho et al. 2004	p.(Leu507*)	c.1520T>A	507	Truncating	Nonsense_Mutation	-
ATM_00374	ATM	Coutinho et al. 2004	p.(Leu507*)	c.1520T>A	507	Truncating	Nonsense_Mutation	-
ATM_00375	ATM	Coutinho et al. 2004	p.(Lys1400*)	c.4198A>T	1400	Truncating	Nonsense_Mutation	-
ATM_00377	ATM	Coutinho et al. 2004	p.(Ser3027fs)	c.9080_9081insA	3027	Truncating	Frame_Shift_Ins	-
ATM_00378	ATM	Coutinho et al. 2004	p.(Trp412*)	c.1236-2A>G	412	Truncating	Nonsense_Mutation	del first 7 nt of exon12
ATM_00378	ATM	Coutinho et al. 2004	p.(Trp412*)	c.1236-2A>G	412	Truncating	Nonsense_Mutation	del first 7 nt of exon12
ATM_00379	ATM	Coutinho et al. 2004	p.(Gln445fs)	c.1333_1334insCC	445	Truncating	Frame_Shift_Ins	-
ATM_00380	ATM	Birrell et al. 2005	p.(Ile346fs)	c.1037_1040delTTGA	346	Truncating	Frame_Shift_Del	-
ATM_00381	ATM	Birrell et al. 2005	p.(Asp1890fs)	c.5664_5665insC	1890	Truncating	Frame_Shift_Ins	-
ATM_00382	ATM	Birrell et al. 2005	p.(?)	c.7307+1G>A	2435	Truncating	Frame_Shift_Ins	aberrant splicing indicated
ATM_00383	ATM	Birrell et al. 2005	p.(?)	c.6572+1G>A	2190	Truncating	Frame_Shift_Ins	aberrant splicing
ATM_00384	ATM	Birrell et al. 2005	p.(Ile1453fs)	c.4357_4358delAT	1453	Truncating	Frame_Shift_Del	-
ATM_00385	ATM	Birrell et al. 2005	p.(?)	c.4682_4687del7	1560	Truncating	Frame_Shift_Ins	listed as published, but only 6 nt spanned by 4682_4687
ATM_00386	ATM	Birrell et al. 2005	p.(?)	c.?	1370	Truncating	Splice_Site	aberrant splicing
ATM_00387	ATM	Birrell et al. 2005	p.(Leu121*)	c.362T>A	121	Truncating	Nonsense_Mutation	-
ATM_00387	ATM	Demuth et al. 2011	p.(Leu121*)	c.362T>A	121	Truncating	Nonsense_Mutation	-
ATM_00388	ATM	Birrell et al. 2005	p.(?)	c.4777-2A>C	1592	Truncating	Frame_Shift_Ins	aberrant splicing
ATM_00389	ATM	Dork et al. 2004	p.(Arg111_Glu166del55insLys)	c.496+5G>A	111	Truncating	Large_DEL	exon 7 deleted in cDNA
ATM_00389	ATM	Netherlands:Amsterdam	p.(Arg111_Glu166del55insLys)	c.496+5G>A	111	Truncating	Large_DEL	exon 7 deleted in cDNA
ATM_00391	ATM	Jiang et al. 2006	p.(Gly204*)	c.610G>T	204	Truncating	Nonsense_Mutation	-
ATM_00394	ATM	Coutinho et al. 2005	p.(Ile1332Alafs*11)	c.3994-159A>G	1332	Truncating	Frame_Shift_Ins	ins29nt after exon 28
ATM_00395	ATM	Saviozzi et al. 2003	p.(Tyr731*)	c.2192_2193insA	731	Truncating	Nonsense_Mutation	-
ATM_00396	ATM	Saviozzi et al. 2003	p.(Ser1037fs)	c.3110_3110delC	1037	Truncating	Frame_Shift_Del	-
ATM_00397	ATM	Magliozzi et al. 2006,Saviozzi et al. 2003	p.(Gln2305*)	c.6913C>T	2305	Truncating	Nonsense_Mutation	-
ATM_00398	ATM	Saviozzi et al. 2003	p.(Met2384*)	c.7150_7150delA	2384	Truncating	Frame_Shift_Del	-
ATM_00399	ATM	Saviozzi et al. 2003	p.(Arg2790fs)	c.8368_8368delA	2790	Truncating	Frame_Shift_Del	-
ATM_00400	ATM	Saviozzi et al. 2003	p.(Cys2930fs)	c.8850G>T	2930	Truncating	Frame_Shift_Ins	exon 63 deleted in cDNA
ATM_00401	ATM	Cavalieri et al. 2006	p.(Arg111*)	c.331A>T	111	Truncating	Nonsense_Mutation	-
ATM_00403	ATM	Cavalieri et al. 2006	p.(Leu240fs)	c.717_720delCCTC	240	Truncating	Frame_Shift_Del	-
ATM_00403	ATM	Magliozzi et al. 2006	p.(Leu240fs)	c.717_720delCCTC	240	Truncating	Frame_Shift_Del	-
ATM_00403	ATM	Netherlands:Amsterdam	p.(Leu240fs)	c.717_720delCCTC	240	Truncating	Frame_Shift_Del	-
ATM_00404	ATM	Cavalieri et al. 2006	p.(Gly509fs)	c.1524_1524delT	509	Truncating	Frame_Shift_Del	-
ATM_00405	ATM	Cavalieri et al. 2006	p.(Trp488*)	c.1463G>A	488	Truncating	Nonsense_Mutation	allele 2 deletes exons 32-36
ATM_00405	ATM	Magliozzi et al. 2006	p.(Trp488*)	c.1463G>A	488	Truncating	Nonsense_Mutation	-
ATM_00406	ATM	Cavalieri et al. 2006	p.(Arg1479fs)	c.4436+2702del8526	1479	Truncating	Frame_Shift_Del	allele 1 deletes exons 32-36
ATM_00407	ATM	Cavalieri et al. 2006	p.(Asn602_Cys633del32)	c.1898+1G>T	602	Truncating	Large_DEL	exon 14 deleted in cDNA
ATM_00408	ATM	Cavalieri et al. 2006	p.(Tyr947fs)	c.2838+2156del18kb	947	Truncating	Frame_Shift_Del	Exons 21-29 deleted
ATM_00408	ATM	Cavalieri et al. 2006	p.(Tyr947fs)	c.2838+2156del18kb	947	Truncating	Frame_Shift_Del	Exons 21-29 deleted
ATM_00411	ATM	Magliozzi et al. 2006	p.(Ser1037fs)	c.3111_3111delT	1037	Truncating	Frame_Shift_Del	-
ATM_00411	ATM	Cavalieri et al. 2006	p.(Val1038*)	c.3111_3111delT	1038	Truncating	Frame_Shift_Del	-
ATM_00412	ATM	Cavalieri et al. 2006	p.(Leu1449fs)	c.4344_4345insA	1449	Truncating	Frame_Shift_Ins	-
ATM_00413	ATM	Buzin et al 2003	p.(Arg2486*)	c.7456C>T	2486	Truncating	Nonsense_Mutation	-
ATM_00413	ATM	Buzin et al 2003	p.(Arg2486*)	c.7456C>T	2486	Truncating	Nonsense_Mutation	-
ATM_00414	ATM	Teraoka et al. 1999,_x001A__x001A_Buzin et al. 2003	p.(0)?	c.3G>A	1	Truncating	Start_Codon	-
ATM_00414	ATM	Buzin et al 2003	p.(Met1Ile)	c.3G>A	1	Truncating	Start_Codon	-
ATM_00418	ATM	Mitui et al. 2005	p.(Lys1706fs)	c.5118_5121delAGAA	1706	Truncating	Frame_Shift_Del	-
ATM_00420	ATM	Buzin et al. 2003	p.(Gln2028*)	c.6082C>T	2028	Truncating	Nonsense_Mutation	-
ATM_00420	ATM	Buzin et al. 2003	p.(Gln2028*)	c.6082C>T	2028	Truncating	Nonsense_Mutation	-
ATM_00420	ATM	Netherlands:Amsterdam	p.(Gln2028*)	c.6082C>T	2028	Truncating	Nonsense_Mutation	-
ATM_00423	ATM	Buzin et al. 2003	p.(Gln466*)	c.1396C>T	466	Truncating	Nonsense_Mutation	-
ATM_00424	ATM	Buzin et al 2003	p.(?)	c.2838+1G>A	946	Truncating	Frame_Shift_Ins	likely splicing mutation
ATM_00425	ATM	Buzin et al 2003	p.(Glu3022fs)	c.9064_9065insG	3022	Truncating	Frame_Shift_Ins	-
ATM_00427	ATM	Magliozzi et al. 2006	p.(Lys1615fs)	c.4844_4844delA	1615	Truncating	Frame_Shift_Del	-
ATM_00428	ATM	Gilad et al. 1996b,Magliozzi et al. 2006	p.(Leu150fs)	c.450_453delTTCT	150	Truncating	Frame_Shift_Del	-
ATM_00430	ATM	Magliozzi et al. 2006, RNA-Gilad et al.1996	p.(Cys1726fs)	c.5319+2T>C	1726	Truncating	Frame_Shift_Ins	-
ATM_00432	ATM	Alterman et al. 2007	p.(Thr1885fs)	c.5653_5653delA	1885	Truncating	Frame_Shift_Del	-
ATM_00432	ATM	Alterman et al. 2007	p.(Thr1885fs)	c.5653_5653delA	1885	Truncating	Frame_Shift_Del	-
ATM_00434	ATM	United States:Los Angeles	p.(Arg63fs)	c.331+5G>A	63	Truncating	Frame_Shift_Ins	exon 6 deleted in cDNA
ATM_00434	ATM	Netherlands:Amsterdam	p.(Arg63fs)	c.331+5G>A	63	Truncating	Frame_Shift_Ins	-
ATM_00434	ATM	Netherlands:Amsterdam	p.(Arg63fs)	c.331+5G>A	63	Truncating	Frame_Shift_Ins	exon 6 deleted in cDNA
ATM_00435	ATM	United States:Los Angeles	p.(Trp1805*)	c.5415G>A	1805	Truncating	Nonsense_Mutation	-
ATM_00436	ATM	United States:Los Angeles	p.(Asn2875fs)	c.8624delA	2875	Truncating	Frame_Shift_Del	-
ATM_00437	ATM	Nakamura et al. 2011,United States:Los Angeles	p.(Gly880fs)	c.2639-19_2639-7del13	880	Truncating	Frame_Shift_Del	-
ATM_00438	ATM	Nakamura et al. 2011,United States:Los Angeles	p.(?)	c.8851-2kbdel17kb	2950	Truncating	LARGE_DEL	-
ATM_00441	ATM	United States:Los Angeles	p.(Asn133fs)	c.397-398insT	133	Truncating	Frame_Shift_Ins	-
ATM_00442	ATM	Nakamura et al. 2011,United States:Los Angeles	p.(Ala302fs)	c.902-19_1065+869del1052	302	Truncating	Frame_Shift_Del	exon 10 deleted in cDNA
ATM_00443	ATM	Nakamura et al. 2011,United States:Los Angeles	p.(Tyr959*)	c.2877C>G	959	Truncating	Nonsense_Mutation	-
ATM_00447	ATM	Nakamura et al. 2011,United States:Los Angeles	p.(Gly880fs)	c.2639-384A>G	880	Truncating	Frame_Shift_Ins	-
ATM_00448	ATM	Mitui et al. 2003	p.(Ser689*)	c.2066C>G	689	Truncating	Nonsense_Mutation	-
ATM_00449	ATM	Cavalieri et al. 2006	p.(Gln2825*)	c.8473C>T	2825	Truncating	Nonsense_Mutation	-
ATM_00450	ATM	Sandoval 1999	p.(Phe2558fs)	c.7671_7674delGTTT	2558	Truncating	Frame_Shift_Del	-
ATM_00450	ATM	Sandoval 1999	p.(Phe2558fs)	c.7671_7674delGTTT	2558	Truncating	Frame_Shift_Del	-
ATM_00450	ATM	Baumer et al. 1996	p.(Phe2558fs)	c.7671_7674delGTTT	2558	Truncating	Frame_Shift_Del	-
ATM_00450	ATM	Baumer et al. 1996	p.(Phe2558fs)	c.7671_7674delGTTT	2558	Truncating	Frame_Shift_Del	-
ATM_00450	ATM	Laake et al. 2000	p.(Phe2558fs)	c.7671_7674delGTTT	2558	Truncating	Frame_Shift_Del	-
ATM_00450	ATM	Castellvi-Bel et al. 1999	p.(Phe2558fs)	c.7671_7674delGTTT	2558	Truncating	Frame_Shift_Del	-
ATM_00451	ATM	Vorechovsky et al. 1996c	p.(Ala622fs)	c.1863_1864insA	622	Truncating	Frame_Shift_Ins	-
ATM_00451	ATM	Vorechovsky et al. 1996c	p.(Ala622fs)	c.1863_1864insA	622	Truncating	Frame_Shift_Ins	-
ATM_00452	ATM	Verhagen et al. 2011,Netherlands:Amsterdam	p.(Phe505Trpfs*10)	c.1514_1515delTT	505	Truncating	Frame_Shift_Del	-
ATM_00453	ATM	Verhagen et al. 2011,Netherlands:Amsterdam	p.(?)	c.3747-1G>C	1249	Truncating	Frame_Shift_Del	-
ATM_00454	ATM	Netherlands:Amsterdam	p.Gln2210fs	c.6629delA	2210	Truncating	Frame_Shift_Del	-
ATM_00455	ATM	Stankovic 1998	p.(?)	c.?	750	Truncating	Nonsense_Mutation	similar to ATM_00130
ATM_00455	ATM	Stankovic 1998	p.(?)	c.?	750	Truncating	Nonsense_Mutation	similar to ATM_00130
ATM_00455	ATM	Stankovic 1998	p.(?)	c.?	750	Truncating	Nonsense_Mutation	similar to ATM_00130
ATM_00455	ATM	Stankovic 1998	p.(?)	c.?	750	Truncating	Nonsense_Mutation	similar to ATM_00130
ATM_00456	ATM	Wright et al. 1996	p.(Ser751_Lys792del42)	c.?	751	Truncating	Large_DEL	-
ATM_00456	ATM	Wright et al. 1996	p.(Ser751_Lys792del42)	c.?	751	Truncating	Large_DEL	-
ATM_00457	ATM	Gilad et al. 1996b	p.(Lys793_Leu822del30)	c.?	793	Truncating	Large_DEL	-
ATM_00457	ATM	Gilad et al. 1996b	p.(Lys793_Leu822del30)	c.?	793	Truncating	Large_DEL	-
ATM_00458	ATM	Gilad et al. 1996b	p.(Ala823_Met946del124)	c.?	823	Truncating	Large_DEL	-
ATM_00458	ATM	Gilad et al. 1996b	p.(Ala823_Met946del124)	c.?	823	Truncating	Large_DEL	-
ATM_00459	ATM	Byrd et al. 1996	p.(Gly880fs)	c.?	880	Truncating	Frame_Shift_Ins	-
ATM_00459	ATM	Byrd et al. 1996,_x001A__x001A_Stankovic 1998	p.(Gly880fs)	c.?	880	Truncating	Frame_Shift_Ins	-
ATM_00459	ATM	Byrd et al. 1996	p.(Gly880fs)	c.?	880	Truncating	Frame_Shift_Ins	-
ATM_00459	ATM	Byrd et al. 1996	p.(Gly880fs)	c.?	880	Truncating	Frame_Shift_Ins	-
ATM_00460	ATM	Laake et al. 2000	p.(Tyr947fs)	c.2921+3_2921+4insT	947	Truncating	Frame_Shift_Ins	-
ATM_00460	ATM	Teraoka et al. 1999	p.(Tyr947fs)	c.2921+3_2921+4insT	947	Truncating	Frame_Shift_Ins	-
ATM_00460	ATM	Teraoka et al. 1999	p.(Tyr947fs)	c.2921+3_2921+4insT	947	Truncating	Frame_Shift_Ins	-
ATM_00460	ATM	Babaei et al. 2005	p.(Tyr947fs)	c.2921+3_2921+4insT	947	Truncating	Frame_Shift_Ins	splicing
ATM_00460	ATM	Babaei et al. 2005	p.(Tyr947fs)	c.2921+3_2921+4insT	947	Truncating	Frame_Shift_Ins	splicing
ATM_00461	ATM	Wright et al. 1996	p.(Tyr1026*)	c.?	1026	Truncating	Nonsense_Mutation	exon 23 and 24 skipped
ATM_00463	ATM	Netherlands:Amsterdam	p.(?)	c.2922-1G>A	974	Truncating	Frame_Shift_Del	-
ATM_00465	ATM	Netherlands:Amsterdam	p.(Asn246fs)	c.738_739delCTinsA	246	Truncating	Frame_Shift_Del	-
ATM_00467	ATM	Netherlands:Amsterdam	p.(?)	c.2376+1G>A	792	Truncating	Frame_Shift_Ins	-
ATM_00469	ATM	Netherlands:Amsterdam	p.(Glu888*)	c.2662G>T	888	Truncating	Nonsense_Mutation	-
ATM_00471	ATM	Netherlands:Amsterdam	p.(Tyr947fs)	c.2921+5G>A	947	Truncating	Frame_Shift_Ins	-
ATM_00475	ATM	Baumer et al. 1996	p.(Ser1135_Lys1192del58)	c.?	1135	Truncating	Large_DEL	-
ATM_00126	ATM	Vorechovsky et al. 1996c	p.(705[TyrSerSer][PheIlePro])	c.[2114_2115delAC;2119_2120insAC]	705	Missense	SMALL_DEL	-
ATM_00206	ATM	Gilad 1998	p.(Ala1812_Phe1813delinsVal)	c.5435_5437del3	1812	Missense	SMALL_DEL	-
ATM_00241	ATM	Gilad 1998	p.(2067)	c.6199_6207del9	2067	Missense	SMALL_DEL	-
ATM_00241	ATM	Gilad 1998	p.(2067)	c.6199_6207del9	2067	Missense	SMALL_DEL	-
ATM_00255	ATM	Castellvi-Bel et al. 1999	p.(Met2224_Arg2227delinsIleSer)	c.6672_6680del9ins3	2224	Missense	SMALL_DEL	may be the same as ATM_00390
ATM_00390	ATM	Fares et al. 2004	p.(Met2224_Arg2227del4insIleSer)	c.[6672_6673delGG;6677_6680delTACG]	2224	Missense	SMALL_DEL	-
ATM_00390	ATM	Fares et al. 2004	p.(Met2224_Arg2227del4insIleSer)	c.[6672_6673delGG;6677_6680delTACG]	2224	Missense	SMALL_DEL	-
ATM_00270	ATM	Stankovic 1998	p.(Leu2427_Arg2428del)	c.7278_7283delCCTTAG	2427	Missense	SMALL_DEL	-
ATM_00270	ATM	Savitsky et al. 1995a	p.(Leu2427_Arg2428del)	c.7278_7283delCCTTAG	2427	Missense	SMALL_DEL	-
ATM_00279	ATM	Watters et al. 1997	p.(Arg2547_Ser2549del)	c.7638_7646del9	2547	Missense	SMALL_DEL	-
ATM_00279	ATM	Watters et al. 1997	p.(Arg2547_Ser2549del)	c.7638_7646del9	2547	Missense	SMALL_DEL	-
ATM_00279	ATM	Savitsky et al. 1995a	p.(Arg2547_Ser2549del)	c.7638_7646del9	2547	Missense	SMALL_DEL	-
ATM_00279	ATM	Savitsky et al. 1995a	p.(Arg2547_Ser2549del)	c.7638_7646del9	2547	Missense	SMALL_DEL	-
ATM_00279	ATM	Gilad et al. 1996b	p.(Arg2547_Ser2549del)	c.7638_7646del9	2547	Missense	SMALL_DEL	-
ATM_00279	ATM	Gilad et al. 1996b	p.(Arg2547_Ser2549del)	c.7638_7646del9	2547	Missense	SMALL_DEL	-
ATM_00279	ATM	Wright et al. 1996	p.(Arg2547_Ser2549del)	c.7638_7646del9	2547	Missense	SMALL_DEL	-
ATM_00279	ATM	Wright et al. 1996,_x001A__x001A_Teraoka et al. 1999	p.(Arg2547_Ser2549del)	c.7638_7646del9	2547	Missense	SMALL_DEL	-
ATM_00279	ATM	Byrd et al. 1996	p.(Arg2547_Ser2549del)	c.7638_7646del9	2547	Missense	SMALL_DEL	-
ATM_00279	ATM	Lakin et al. 1996	p.(Arg2547_Ser2549del)	c.7638_7646del9	2547	Missense	SMALL_DEL	-
ATM_00279	ATM	Byrd et al. 1996	p.(Arg2547_Ser2549del)	c.7638_7646del9	2547	Missense	SMALL_DEL	-
ATM_00279	ATM	Wright et al. 1996	p.(Arg2547_Ser2549del)	c.7638_7646del9	2547	Missense	SMALL_DEL	-
ATM_00279	ATM	Savitsky et al. 1995a	p.(Arg2547_Ser2549del)	c.7638_7646del9	2547	Missense	SMALL_DEL	-
ATM_00279	ATM	Stankovic 1998	p.(Arg2547_Ser2549del)	c.7638_7646del9	2547	Missense	SMALL_DEL	-
ATM_00279	ATM	Stankovic 1998	p.(Arg2547_Ser2549del)	c.7638_7646del9	2547	Missense	SMALL_DEL	-
ATM_00279	ATM	Stankovic 1998	p.(Arg2547_Ser2549del)	c.7638_7646del9	2547	Missense	SMALL_DEL	-
ATM_00279	ATM	Li and Swift, 2000	p.(Arg2547_Ser2549del)	c.7638_7646del9	2547	Missense	SMALL_DEL	-
ATM_00279	ATM	Li and Swift, 2000	p.(Arg2547_Ser2549del)	c.7638_7646del9	2547	Missense	SMALL_DEL	-
ATM_00279	ATM	Li and Swift, 2000	p.(Arg2547_Ser2549del)	c.7638_7646del9	2547	Missense	SMALL_DEL	-
ATM_00279	ATM	Li and Swift, 2000	p.(Arg2547_Ser2549del)	c.7638_7646del9	2547	Missense	SMALL_DEL	-
ATM_00279	ATM	Li and Swift, 2000	p.(Arg2547_Ser2549del)	c.7638_7646del9	2547	Missense	SMALL_DEL	-
ATM_00279	ATM	Li and Swift, 2000	p.(Arg2547_Ser2549del)	c.7638_7646del9	2547	Missense	SMALL_DEL	-
ATM_00279	ATM	Li and Swift, 2000	p.(Arg2547_Ser2549del)	c.7638_7646del9	2547	Missense	SMALL_DEL	-
ATM_00279	ATM	Li and Swift, 2000	p.(Arg2547_Ser2549del)	c.7638_7646del9	2547	Missense	SMALL_DEL	-
ATM_00279	ATM	Buzin et al. 2003	p.(Arg2547_Ser2549del)	c.7638_7646del9	2547	Missense	SMALL_DEL	-
ATM_00279	ATM	Stankovic 1998	p.(Arg2547_Ser2549del)	c.7638_7646del9	2547	Missense	SMALL_DEL	-
ATM_00279	ATM	Stankovic 1998	p.(Arg2547_Ser2549del)	c.7638_7646del9	2547	Missense	SMALL_DEL	-
ATM_00415	ATM	Buzin et al 2003	p.(Arg2598_Glu2600delinsGln)	c.7793-7798delinsCC	2598	Missense	SMALL_DEL	-
ATM_00291	ATM	Sandoval 1999	p.(Val2664del)	c.7989_7991del3	2664	Missense	SMALL_DEL	-
ATM_00291	ATM	Sandoval 1999	p.(Val2664del)	c.7989_7991del3	2664	Missense	SMALL_DEL	-
ATM_00291	ATM	Li and Swift, 2000	p.(Val2664del)	c.7989_7991del3	2664	Missense	SMALL_DEL	-
ATM_00291	ATM	Castellvi-Bel et al. 1999	p.(Val2664del)	c.7989_7991del3	2664	Missense	SMALL_DEL	-
ATM_00291	ATM	Demuth et al. 2011	p.(Val2664del)	c.7989_7991del3	2664	Missense	SMALL_DEL	-
ATM_00311	ATM	Li and Swift, 2000	p.(Ser2855_Val2856delinsArgIle)	c.8565_8566delTGinsAA	2855	Missense	SMALL_DEL	-
ATM_00311	ATM	Telatar et al. 1996,_x001A__x001A_Hacia et al. 1998	p.(Ser2855_Val2866delinsArgIle)	c.8565_8566delTGinsAA	2855	Missense	SMALL_DEL	-
ATM_00313	ATM	Savitsky et al. 1995a	p.(Ser2860del)	c.8578_8580del3	2860	Missense	SMALL_DEL	-
ATM_00084	ATM	Laake et al. 2000	p.(2904_2905delGluThr)	c.8711_8716delAGACAG	2904	Missense	SMALL_DEL	-
ATM_00475	ATM	Baumer et al. 1996	p.(Ser1135_Lys1192del58)	c.?	1135	Truncating	Large_DEL	-
ATM_00475	ATM	Gilad et al. 1996b	p.(Ser1135_Lys1192del58)	c.?	1135	Truncating	Large_DEL	-
ATM_00477	ATM	Gilad et al. 1996b	p.(Asp1371Ilefs*38)	c.?	1371	Truncating	Frame_Shift_Ins	exon 30 deleted in cDNA
ATM_00477	ATM	Gilad et al. 1996b	p.(Asp1371Ilefs*38)	c.?	1371	Truncating	Frame_Shift_Ins	exon 30 deleted in cDNA
ATM_00478	ATM	Demuth et al. 2011	p.(Ser2192*)	c.6575C>G	2192	Truncating	Nonsense_Mutation	-
ATM_00480	ATM	Demuth et al. 2011	p.(Lys1754Aspfs*13)	c.5260_5264del5	1754	Truncating	Frame_Shift_Del	-
ATM_00481	ATM	Demuth et al. 2011	p.(Asp1371Leufs*18)	c.4110-9C>G	1371	Truncating	Frame_Shift_Ins	-
ATM_00482	ATM	Demuth et al. 2011	p.(Gly1130*)	c.3387_3390del4	1130	Truncating	Frame_Shift_Del	-
ATM_00483	ATM	Verhagen et al. 2011	p.(Thr554Argfs*1)	c.1660delA	554	Truncating	Frame_Shift_Del	-
ATM_00484	ATM	Demuth et al. 2011	p.(Leu1096Ilefs*26)	c.3285-2A>G	1096	Truncating	Frame_Shift_Ins	-
SMALL_INDEL indicates indels affact less than five amino acides

## Sheet: Supplementary Information 1B
Supplementary Table 2: Detailed list and annotation of somatic mutations in ATM from 5,402 TCGA tumor samples.
variance ID	Hugo_Symbol	Sample_ID	Protein_Change	Codons	cDNA_position	CDS_position	Protein_position	Mutation_Type	Effect	Chromosome	Start_Position	End_Position	Reference_Allele	Variant_Allele	Transcript	Existing_variation	SIFT	PolyPhen
ATM_S001	ATM	TCGA-BR-4361-01A-01D-1158-08	V4	gtA/gtG	397	12	4	Silent_Mutation	Silent	11	108098363	108098363	A	G	NM_000051.3	-	-	-
ATM_S002	ATM	TCGA-OR-A5K4-01A-11D-A29I-10	R23*	Cga/Tga	452	67	23	Nonsense_Mutation	Truncating	11	108098418	108098418	C	T	NM_000051.3	CM024724	-	-
ATM_S003	ATM	TCGA-BR-4292-01A-01D-1126-08	R23Q	cGa/cAa	453	68	23	Missense_Mutation	Missense	11	108098419	108098419	G	A	NM_000051.3	COSM1152242,COSM21316	deleterious(0)	probably_damaging(0.965)
ATM_S003	ATM	TCGA-D1-A17T-01A-11D-A12J-09	R23Q	cGa/cAa	453	68	23	Missense_Mutation	Missense	11	108098419	108098419	G	A	NM_000051.3	COSM1152242,COSM21316	deleterious(0)	probably_damaging(0.965)
ATM_S004	ATM	TCGA-E2-A1IJ-01A-11D-A142-09	A59S	Gct/Tct	560	175	59	Missense_Mutation	Missense	11	108098605	108098605	G	T	NM_000051.3	COSM1474977,COSM1474978	tolerated(0.21)	possibly_damaging(0.826)
ATM_S005	ATM	TCGA-17-Z031-01A-01W-0746-08	--	-	-	-	-	intron_variant	intron_variant	11	108098693	108098693	G	C	NM_000051.3	-	-	-
ATM_S006	ATM	TCGA-AP-A059-01A-21D-A122-09	P80S	Cca/Tca	623	238	80	Missense_Mutation	Missense	11	108099957	108099957	C	T	NM_000051.3	COSM1585374,COSM922696	tolerated(0.76)	benign(0.021)
ATM_S007	ATM	TCGA-AP-A059-01A-21D-A122-09	L100W	tTg/tGg	684	299	100	Missense_Mutation	Missense	11	108100018	108100018	T	G	NM_000051.3	CM000648,COSM1585373,COSM922697	deleterious(0)	probably_damaging(0.999)
ATM_S008	ATM	TCGA-AC-A23H-01A-11D-A159-09	I105	atC/atT	700	315	105	Silent_Mutation	Silent	11	108100034	108100034	C	T	NM_000051.3	-	-	-
ATM_S009	ATM	TCGA-CR-6481-01A-11D-1870-08	I124	atC/atT	757	372	124	Silent_Mutation	Silent	11	108106437	108106437	C	T	NM_000051.3	-	-	-
ATM_S010	ATM	TCGA-CJ-4639-01A-02D-1386-10	K129*	Aaa/Taa	770	385	129	Nonsense_Mutation	Truncating	11	108106450	108106450	A	T	NM_000051.3	-	-	-
ATM_S011	ATM	TCGA-BS-A0UF-01A-11D-A10B-09	S131*	tCa/tAa	777	392	131	Nonsense_Mutation	Truncating	11	108106457	108106457	C	A	NM_000051.3	COSM1585372,COSM922698	-	-
ATM_S012	ATM	TCGA-AO-A129-01A-21D-A10M-09	I136fs	aTt/at	792	407	136	Frame_Shift_Del	Truncating	11	108106472	108106472	T	-	NM_000051.3	COSM1474979,COSM428356	-	-
ATM_S013	ATM	TCGA-BT-A3PH-01A-11D-A21Z-08	E158Q	Gaa/Caa	857	472	158	Missense_Mutation	Missense	11	108106537	108106537	G	C	NM_000051.3	COSM1297600,COSM1297601	deleterious(0.03)	probably_damaging(0.992)
ATM_S014	ATM	TCGA-EE-A2GN-06A-11D-A196-08	W164fs	tgg/tGGTTAgg	875-876	490-491	164	Frame_Shift_Ins	Truncating	11	108106555	108106556	-	GGTTA	NM_000051.3	-	-	-
ATM_S015	ATM	TCGA-BR-8680-01A-11D-2394-08	F168L	ttC/ttA	889	504	168	Missense_Mutation	Missense	11	108114687	108114687	C	A	NM_000051.3	-	tolerated(1)	benign(0)
ATM_S016	ATM	TCGA-DD-A4NV-01A-11D-A30V-10	L174R	cTc/cGc	906	521	174	Missense_Mutation	Missense	11	108114704	108114704	T	G	NM_000051.3	-	deleterious(0.01)	probably_damaging(0.977)
ATM_S017	ATM	TCGA-EW-A3E8-01B-11D-A243-09	L176	ctG/ctC	913	528	176	Silent_Mutation	Silent	11	108114711	108114711	G	C	NM_000051.3	-	-	-
ATM_S018	ATM	TCGA-CD-A4MI-01A-21D-A25D-08	G204*	Gga/Tga	995	610	204	Nonsense_Mutation	Truncating	11	108114793	108114793	G	T	NM_000051.3	rs147915571,CM056524	-	-
ATM_S019	ATM	TCGA-CC-A5UD-01A-11D-A28X-10	C219S	Tgt/Agt	1040	655	219	Missense_Mutation	Missense	11	108114838	108114838	T	A	NM_000051.3	-	tolerated(0.4)	benign(0.001)
ATM_S020	ATM	TCGA-CN-6024-01A-11D-1683-08	I238V	Atc/Gtc	1097	712	238	Missense_Mutation	Missense	11	108115564	108115564	A	G	NM_000051.3	-	tolerated(0.65)	benign(0.001)
ATM_S021	ATM	TCGA-25-2399-01	L243S	tTg/tCg	1113	728	243	Missense_Mutation	Missense	11	108115580	108115580	T	C	NM_000051.3	COSM117860	tolerated(0.21)	benign(0.006)
ATM_S022	ATM	TCGA-BR-7851-01A-11D-2201-08	A244V	gCt/gTt	1116	731	244	Missense_Mutation	Missense	11	108115583	108115583	C	T	NM_000051.3	-	deleterious(0.01)	benign(0.03)
ATM_S023	ATM	TCGA-AP-A056-01A-11W-A027-09	R248Q	cGa/cAa	1128	743	248	Missense_Mutation	Missense	11	108115595	108115595	G	A	NM_000051.3	COSM1183969,COSM1585371,COSM922699,COSM1183970	deleterious(0)	probably_damaging(0.997)
ATM_S024	ATM	TCGA-AX-A05Z-01A-11W-A027-09	R250*	Cga/Tga	1133	748	250	Nonsense_Mutation	Truncating	11	108115600	108115600	C	T	NM_000051.3	CS991299,CM030188,COSM1135092,COSM173211	-	-
ATM_S024	ATM	TCGA-B0-5703-01A-11D-1534-10	R250*	Cga/Tga	1133	748	250	Nonsense_Mutation	Truncating	11	108115600	108115600	C	T	NM_000051.3	CS991299,CM030188,COSM1135092,COSM173211	-	-
ATM_S024	ATM	TCGA-B5-A0JY-01A-11D-A10B-09	R250*	Cga/Tga	1133	748	250	Nonsense_Mutation	Truncating	11	108115600	108115600	C	T	NM_000051.3	CS991299,CM030188,COSM1135092,COSM173211	-	-
ATM_S024	ATM	TCGA-AA-A010-01A-01W-A00E-09	R250*	Cga/Tga	1133	748	250	Nonsense_Mutation	Truncating	11	108115600	108115600	C	T	NM_000051.3	CS991299,CM030188,COSM1135092,COSM173211	-	-
ATM_S024	ATM	TCGA-AG-3727-01	R250*	Cga/Tga	1133	748	250	Nonsense_Mutation	Truncating	11	108115600	108115600	C	T	NM_000051.3	CS991299,CM030188,COSM1135092,COSM173211	-	-
ATM_S025	ATM	TCGA-AP-A0LM-01A-11D-A122-09	L259I	Ctt/Att	1160	775	259	Missense_Mutation	Missense	11	108115627	108115627	C	A	NM_000051.3	COSM1133332,COSM1585370,COSM922700,COSM415357	tolerated(0.07)	possibly_damaging(0.744)
ATM_S026	ATM	TCGA-BT-A20U-01A-11D-A14W-08	L259F	Ctt/Ttt	1160	775	259	Missense_Mutation	Missense	11	108115627	108115627	C	T	NM_000051.3	COSM1133332,COSM1585370,COSM922700,COSM415357	tolerated(0.23)	benign(0.26)
ATM_S027	ATM	TCGA-B5-A11H-01A-11D-A122-09	R270	agG/agA	1195	810	270	Silent_Mutation	Silent	11	108115662	108115662	G	A	NM_000051.3	COSM1585369,COSM922701	-	-
ATM_S028	ATM	TCGA-FT-A3EE-01A-11D-A202-08	Q284P	cAa/cCa	1236	851	284	Missense_Mutation	Missense	11	108115703	108115703	A	C	NM_000051.3	-	tolerated(0.09)	benign(0.392)
ATM_S029	ATM	TCGA-EE-A29L-06A-12D-A196-08	H290Y	Cat/Tat	1253	868	290	Missense_Mutation	Missense	11	108115720	108115720	C	T	NM_000051.3	-	deleterious(0)	possibly_damaging(0.852)
ATM_S030	ATM	TCGA-55-1595-01A-01D-0969-08	A295P	Gcc/Ccc	1268	883	295	Missense_Mutation	Missense	11	108115735	108115735	G	C	NM_000051.3	COSM1139581,COSM540415	deleterious(0.01)	probably_damaging(1)
ATM_S031	ATM	TCGA-AX-A0J1-01A-11W-A062-09	D317G	gAt/gGt	1335	950	317	Missense_Mutation	Missense	11	108117739	108117739	A	G	NM_000051.3	COSM1585368,COSM922702	deleterious(0.01)	probably_damaging(0.927)
ATM_S032	ATM	TCGA-BR-4257-01A-01D-1126-08	R337C	Cgt/Tgt	1394	1009	337	Missense_Mutation	Missense	11	108117798	108117798	C	T	NM_000051.3	rs138398778,COSM1350749,COSM21931,COSM21323,CM0910483	deleterious(0)	probably_damaging(0.999)
ATM_S032	ATM	TCGA-CG-5723-01A-11D-1600-08	R337C	Cgt/Tgt	1394	1009	337	Missense_Mutation	Missense	11	108117798	108117798	C	T	NM_000051.3	rs138398778,COSM1350749,COSM21931,COSM21323,CM0910483	deleterious(0)	probably_damaging(0.999)
ATM_S032	ATM	TCGA-CR-7380-01A-11D-2012-08	R337C	Cgt/Tgt	1394	1009	337	Missense_Mutation	Missense	11	108117798	108117798	C	T	NM_000051.3	rs138398778,COSM1350749,COSM21931,COSM21323,CM0910483	deleterious(0)	probably_damaging(0.999)
ATM_S032	ATM	TCGA-EE-A29S-06A-11D-A197-08	R337C	Cgt/Tgt	1394	1009	337	Missense_Mutation	Missense	11	108117798	108117798	C	T	NM_000051.3	rs138398778,COSM1350749,COSM21931,COSM21323,CM0910483	deleterious(0)	probably_damaging(0.999)
ATM_S032	ATM	TCGA-FW-A3R5-06A-11D-A23B-08	R337C	Cgt/Tgt	1394	1009	337	Missense_Mutation	Missense	11	108117798	108117798	C	T	NM_000051.3	rs138398778,COSM1350749,COSM21931,COSM21323,CM0910483	deleterious(0)	probably_damaging(0.999)
ATM_S033	ATM	TCGA-AN-A046-01A-21W-A050-09	R337H	cGt/cAt	1395	1010	337	Missense_Mutation	Missense	11	108117799	108117799	G	A	NM_000051.3	rs202160435,COSM1158322,COSM1235401,COSM21301	deleterious(0.02)	probably_damaging(0.995)
ATM_S033	ATM	TCGA-DK-A1AG-01A-11D-A13W-08	R337H	cGt/cAt	1395	1010	337	Missense_Mutation	Missense	11	108117799	108117799	G	A	NM_000051.3	rs202160435,COSM1158322,COSM1235401,COSM21301	deleterious(0.02)	probably_damaging(0.995)
ATM_S034	ATM	TCGA-AP-A0LM-01A-11D-A122-09	D351Y	Gat/Tat	1436	1051	351	Missense_Mutation	Missense	11	108117840	108117840	G	T	NM_000051.3	COSM1585367,COSM922703	deleterious(0)	probably_damaging(0.991)
ATM_S035	ATM	TCGA-AX-A063-01A-11W-A027-09	D360Y	Gat/Tat	1463	1078	360	Missense_Mutation	Missense	11	108119672	108119672	G	T	NM_000051.3	COSM1585366,COSM922704	deleterious(0.01)	possibly_damaging(0.839)
ATM_S036	ATM	TCGA-AP-A056-01A-11W-A027-09	S367F	tCt/tTt	1485	1100	367	Missense_Mutation	Missense	11	108119694	108119694	C	T	NM_000051.3	COSM1585365,COSM922705	deleterious(0)	benign(0.008)
ATM_S037	ATM	TCGA-A8-A06X-01A-21W-A019-09	S378R	agT/agG	1519	1134	378	Missense_Mutation	Missense	11	108119728	108119728	T	G	NM_000051.3	COSM1474980,COSM428357	tolerated(0.6)	benign(0.002)
ATM_S038	ATM	TCGA-B5-A11E-01A-11D-A10M-09	E390*	Gaa/Taa	1553	1168	390	Nonsense_Mutation	Truncating	11	108119762	108119762	G	T	NM_000051.3	COSM1585364,COSM922706	-	-
ATM_S039	ATM	TCGA-38-4632-01A-01D-1753-08	--	-	-	-	-	intron_variant	intron_variant	11	108121360	108121360	A	G	NM_000051.3	-	-	-
ATM_S040	ATM	TCGA-CR-7395-01A-11D-2012-08	W412C	tgG/tgC	1621	1236	412	Missense_Mutation	Missense	11	108121428	108121428	G	C	NM_000051.3	-	deleterious(0)	probably_damaging(0.954)
ATM_S041	ATM	TCGA-D7-8573-01A-11D-2340-08	L413I	Cta/Ata	1622	1237	413	Missense_Mutation	Missense	11	108121429	108121429	C	A	NM_000051.3	-	tolerated(0.12)	probably_damaging(0.999)
ATM_S042	ATM	TCGA-EE-A2GR-06A-11D-A197-08	C430S	Tgt/Agt	1673	1288	430	Missense_Mutation	Missense	11	108121480	108121480	T	A	NM_000051.3	-	tolerated(0.78)	benign(0.001)
ATM_S043	ATM	TCGA-D8-A1XO-01A-11D-A14K-09	L432	ctG/ctT	1681	1296	432	Silent_Mutation	Silent	11	108121488	108121488	G	T	NM_000051.3	COSM1474981,COSM1474982	-	-
ATM_S044	ATM	TCGA-BR-6454-01A-11D-1800-08	S440fs	TCt/t	1703-1704	1318-1319	440	Frame_Shift_Del	Truncating	11	108121510	108121511	TC	-	NM_000051.3	-	-	-
ATM_S045	ATM	TCGA-C5-A2M2-01A-21D-A18J-09	G449W	Ggg/Tgg	1730	1345	449	Missense_Mutation	Missense	11	108121537	108121537	G	T	NM_000051.3	-	deleterious(0)	probably_damaging(0.999)
ATM_S046	ATM	TCGA-G3-A25S-01A-11D-A16V-10	S474G	Agc/Ggc	1805	1420	474	Missense_Mutation	Missense	11	108121612	108121612	A	G	NM_000051.3	-	tolerated(0.21)	benign(0.001)
ATM_S047	ATM	TCGA-AA-A00N-01A-02W-A00E-09	K477N	aaG/aaT	1816	1431	477	Missense_Mutation	Missense	11	108121623	108121623	G	T	NM_000051.3	COSM274076	deleterious(0.04)	probably_damaging(0.917)
ATM_S048	ATM	TCGA-BS-A0UV-01A-11D-A10B-09	K482Q	Aaa/Caa	1829	1444	482	Missense_Mutation	Missense	11	108121636	108121636	A	C	NM_000051.3	rs202173660,COSM1585363,COSM922707	tolerated(0.08)	benign(0.342)
ATM_S049	ATM	TCGA-EJ-7783-01A-11D-2114-08	W484fs	tGg/tg	1836	1451	484	Frame_Shift_Del	Truncating	11	108121643	108121643	G	-	NM_000051.3	-	-	-
ATM_S050	ATM	TCGA-AX-A0J0-01A-11D-A117-09	I487M	atT/atG	1846	1461	487	Missense_Mutation	Missense	11	108121653	108121653	T	G	NM_000051.3	COSM1585362,COSM922708	deleterious(0.01)	possibly_damaging(0.792)
ATM_S051	ATM	TCGA-AA-3679-01A-02W-0900-09	Q499E	Caa/Gaa	1880	1495	499	Missense_Mutation	Missense	11	108121687	108121687	C	G	NM_000051.3	COSM267932	tolerated(0.07)	benign(0.129)
ATM_S052	ATM	TCGA-AP-A059-01A-21D-A122-09	E522*	Gaa/Taa	1949	1564	522	Nonsense_Mutation	Truncating	11	108121756	108121756	G	T	NM_000051.3	CD961794,COSM1585361,COSM922709	-	-
ATM_S053	ATM	TCGA-D1-A15X-01A-11D-A122-09	A531	gcC/gcT	1978	1593	531	Silent_Mutation	Silent	11	108121785	108121785	C	T	NM_000051.3	COSM1585360,COSM922710	-	-
ATM_S054	ATM	TCGA-05-4390-01A-02D-1753-08	--	-	-	-	-	intron_variant	intron_variant	11	108122517	108122517	C	T	NM_000051.3	-	-	-
ATM_S055	ATM	TCGA-FD-A3SL-01A-21D-A22Z-08	K556	aaA/aaG	2053	1668	556	Silent_Mutation	Silent	11	108122624	108122624	A	G	NM_000051.3	-	-	-
ATM_S056	ATM	TCGA-BT-A3PK-01A-21D-A21Z-08	G558V	gGa/gTa	2058	1673	558	Missense_Mutation	Missense	11	108122629	108122629	G	T	NM_000051.3	COSM1350767,COSM1350768	deleterious(0.01)	benign(0.424)
ATM_S057	ATM	TCGA-BS-A0UF-01A-11D-A10B-09	F570L	Ttt/Ctt	2093	1708	570	Missense_Mutation	Missense	11	108122664	108122664	T	C	NM_000051.3	COSM1350771,COSM922711	tolerated(0.57)	benign(0.001)
ATM_S058	ATM	TCGA-Q1-A73O-01A-11D-A32I-09	P597A	Cca/Gca	2174	1789	597	Missense_Mutation	Missense	11	108122745	108122745	C	G	NM_000051.3	-	deleterious(0.03)	probably_damaging(0.979)
ATM_S059	ATM	TCGA-AA-3518-01A-02W-0833-10	S614N	aGt/aAt	2226	1841	614	Missense_Mutation	Missense	11	108123582	108123582	G	A	NM_000051.3	COSM200656	deleterious(0.01)	probably_damaging(0.987)
ATM_S060	ATM	TCGA-55-6642-01A-11D-1855-08	Q628*	Caa/Taa	2267	1882	628	Nonsense_Mutation	Truncating	11	108123623	108123623	C	T	NM_000051.3	COSM1139582,COSM540414	-	-
ATM_S061	ATM	TCGA-OR-A5KP-01A-11D-A30A-10	S629fs	aGc/ac	2271	1886	629	Frame_Shift_Del	Truncating	11	108123627	108123627	G	-	NM_000051.3	-	-	-
ATM_S062	ATM	TCGA-B5-A11E-01A-11D-A10M-09	P631S	Cca/Tca	2276	1891	631	Missense_Mutation	Missense	11	108123632	108123632	C	T	NM_000051.3	COSM1585359,COSM922712	tolerated(0.48)	benign(0.001)
ATM_S063	ATM	TCGA-C5-A1MH-01A-11D-A14W-08	E632K	Gaa/Aaa	2279	1894	632	Missense_Mutation	Missense	11	108123635	108123635	G	A	NM_000051.3	-	tolerated(0.51)	benign(0.004)
ATM_S064	ATM	TCGA-D8-A1J9-01A-11D-A13L-09	E642K	Gaa/Aaa	2309	1924	642	Missense_Mutation	Missense	11	108124566	108124566	G	A	NM_000051.3	COSM1474983,COSM1474984	tolerated(0.22)	benign(0.011)
ATM_S065	ATM	TCGA-LL-A5YN-01A-11D-A28B-09	D661fs	-/T	2368-2369	1983-1984	661-662	Frame_Shift_Ins	Truncating	11	108124625	108124626	-	T	NM_000051.3	-	-	-
ATM_S066	ATM	TCGA-EE-A2GI-06A-11D-A196-08	T664	acC/acT	2377	1992	664	Silent_Mutation	Silent	11	108124634	108124634	C	T	NM_000051.3	-	-	-
ATM_S067	ATM	TCGA-OL-A5RW-01A-11D-A28B-09	V716L	Gtc/Ctc	2531	2146	716	Missense_Mutation	Missense	11	108126963	108126963	G	C	NM_000051.3	-	tolerated(0.17)	benign(0.035)
ATM_S068	ATM	TCGA-AP-A051-01A-21W-A027-09	S719*	tCa/tAa	2541	2156	719	Nonsense_Mutation	Truncating	11	108126973	108126973	C	A	NM_000051.3	COSM1585358,COSM922713	-	-
ATM_S069	ATM	TCGA-KN-8435-01A-11D-2310-10	G724V	gGt/gTt	2556	2171	724	Missense_Mutation	Missense	11	108126988	108126988	G	T	NM_000051.3	-	deleterious(0.02)	possibly_damaging(0.887)
ATM_S070	ATM	TCGA-91-6836-01A-21D-1855-08	M732I	atG/atT	2581	2196	732	Missense_Mutation	Missense	11	108127013	108127013	G	T	NM_000051.3	-	tolerated(0.55)	benign(0.001)
ATM_S071	ATM	TCGA-BC-A10W-01A-11D-A12Z-10	E739*	Gaa/Taa	2600	2215	739	Nonsense_Mutation	Truncating	11	108127032	108127032	G	T	NM_000051.3	-	-	-
ATM_S072	ATM	TCGA-B0-5703-01A-11D-1534-10	A749T	Gcc/Acc	2630	2245	749	Missense_Mutation	Missense	11	108127062	108127062	G	A	NM_000051.3	COSM1135093,COSM466265	tolerated(0.21)	probably_damaging(0.994)
ATM_S073	ATM	TCGA-CZ-5986-01A-11D-1669-08	A749fs	gCc/gc	2631	2246	749	Frame_Shift_Del	Truncating	11	108127063	108127063	C	-	NM_000051.3	-	-	-
ATM_S074	ATM	TCGA-BS-A0UM-01A-11W-A10C-09	G774C	Ggt/Tgt	2705	2320	774	Missense_Mutation	Missense	11	108128277	108128277	G	T	NM_000051.3	COSM1152244,COSM922714	tolerated(0.09)	benign(0.008)
ATM_S075	ATM	TCGA-A8-A07O-01A-11W-A019-09	N796T	aAt/aCt	2772	2387	796	Missense_Mutation	Missense	11	108129723	108129723	A	C	NM_000051.3	COSM1474985,COSM428358	tolerated(0.53)	benign(0.028)
ATM_S076	ATM	TCGA-FU-A3HZ-01A-11D-A20U-09	S800F	tCt/tTt	2784	2399	800	Missense_Mutation	Missense	11	108129735	108129735	C	T	NM_000051.3	-	deleterious(0)	probably_damaging(0.971)
ATM_S076	ATM	TCGA-JW-A5VL-01A-11D-A28B-09	S800F	tCt/tTt	2784	2399	800	Missense_Mutation	Missense	11	108129735	108129735	C	T	NM_000051.3	-	deleterious(0)	probably_damaging(0.971)
ATM_S077	ATM	TCGA-D7-A4YV-01A-11D-A25D-08	A816	gcA/gcC	2833	2448	816	Silent_Mutation	Silent	11	108129784	108129784	A	C	NM_000051.3	-	-	-
ATM_S078	ATM	TCGA-AA-3977-01A-01W-0995-10	L822V	Tta/Gta	2849	2464	822	Missense_Mutation	Missense	11	108129800	108129800	T	G	NM_000051.3	CD961797,COSM200657	deleterious(0.04)	possibly_damaging(0.488)
ATM_S079	ATM	TCGA-64-5775-01A-01D-1625-08	D841Y	Gat/Tat	2906	2521	841	Missense_Mutation	Missense	11	108137952	108137952	G	T	NM_000051.3	CD982453,COSM1139584,COSM540412	deleterious(0)	possibly_damaging(0.839)
ATM_S080	ATM	TCGA-FW-A3R5-06A-11D-A23B-08	Y861	taC/taT	2968	2583	861	Silent_Mutation	Silent	11	108138014	108138014	C	T	NM_000051.3	-	-	-
ATM_S081	ATM	TCGA-CC-A3MB-01A-11D-A20W-10	S867T	aGt/aCt	2985	2600	867	Missense_Mutation	Missense	11	108138031	108138031	G	C	NM_000051.3	-	tolerated(0.21)	benign(0.002)
ATM_S082	ATM	TCGA-BR-8680-01A-11D-2394-08	E871K	Gaa/Aaa	2996	2611	871	Missense_Mutation	Missense	11	108138042	108138042	G	A	NM_000051.3	-	tolerated(0.14)	benign(0.047)
ATM_S083	ATM	TCGA-OR-A5LJ-01A-11D-A29I-10	S875	agC/agT	3010	2625	875	Silent_Mutation	Silent	11	108138056	108138056	C	T	NM_000051.3	-	-	-
ATM_S084	ATM	TCGA-EE-A29V-06A-12D-A197-08	S917	tcC/tcT	3136	2751	917	Silent_Mutation	Silent	11	108139249	108139249	C	T	NM_000051.3	-	-	-
ATM_S085	ATM	TCGA-AA-3710-01A-01W-0995-10	A920V	gCa/gTa	3144	2759	920	Missense_Mutation	Missense	11	108139257	108139257	C	T	NM_000051.3	COSM200660	tolerated(0.12)	benign(0.023)
ATM_S086	ATM	TCGA-50-5044-01A-21D-1855-08	R924	Cgg/Agg	3155	2770	924	Silent_Mutation	Silent	11	108139268	108139268	C	A	NM_000051.3	rs55723361	-	-
ATM_S087	ATM	TCGA-AG-A002-01A-01W-A005-10	L942I	Ctc/Atc	3209	2824	942	Missense_Mutation	Missense	11	108139322	108139322	C	A	NM_000051.3	rs3218688,COSM168656	deleterious(0.03)	benign(0.162)
ATM_S088	ATM	TCGA-FZ-5923-01A-12D-1609-08	Y947__splice	-	?-3224	?-2839	?-947	Splice_Site	Truncating	11	108141784	108141791	ATCTTAGT	-	NM_000051.3	-	-	-
ATM_S089	ATM	TCGA-BS-A0UF-01A-11D-A10B-09	S978A	Tct/Gct	3317	2932	978	Missense_Mutation	Missense	11	108141988	108141988	T	G	NM_000051.3	rs139552233,COSM1585357,COSM21828,COSM922715	deleterious(0.02)	benign(0.217)
ATM_S090	ATM	TCGA-AA-A022-01A-21W-A096-10	A1024T	Gca/Aca	3455	3070	1024	Missense_Mutation	Missense	11	108142126	108142126	G	A	NM_000051.3	COSM200661	deleterious(0.02)	possibly_damaging(0.493)
ATM_S091	ATM	TCGA-GV-A40E-01A-12D-A23M-08	A1024fs	-/T	3457-3458	3072-3073	1024-1025	Frame_Shift_Ins	Truncating	11	108142128	108142129	-	T	NM_000051.3	COSM1350818,COSM1350819	-	-
ATM_S092	ATM	TCGA-49-6743-01A-11D-1855-08	--	-	-	-	-	intron_variant	intron_variant	11	108142174	108142174	A	G	NM_000051.3	rs199701726	-	-
ATM_S093	ATM	TCGA-44-6774-01A-21D-1855-08	--	-	-	-	-	intron_variant	intron_variant	11	108142314	108142314	T	A	NM_000051.3	-	-	-
ATM_S094	ATM	TCGA-CN-6024-01A-11D-1683-08	I1035V	Ata/Gta	3488	3103	1035	Missense_Mutation	Missense	11	108143284	108143284	A	G	NM_000051.3	-	tolerated(0.29)	benign(0.001)
ATM_S095	ATM	TCGA-AP-A059-01A-21D-A122-09	L1046R	cTt/cGt	3522	3137	1046	Missense_Mutation	Missense	11	108143318	108143318	T	G	NM_000051.3	COSM1585356,COSM922716	deleterious(0)	possibly_damaging(0.757)
ATM_S096	ATM	TCGA-17-Z055-01A-01W-0747-08	--	-	-	-	-	intron_variant	intron_variant	11	108143387	108143387	C	G	NM_000051.3	-	-	-
ATM_S097	ATM	TCGA-CN-5373-01A-01D-1434-08	D1053N	Gat/Aat	3542	3157	1053	Missense_Mutation	Missense	11	108143452	108143452	G	A	NM_000051.3	-	deleterious(0)	probably_damaging(0.987)
ATM_S098	ATM	TCGA-J4-A67Q-01A-21D-A30E-08	L1078V	Ctt/Gtt	3617	3232	1078	Missense_Mutation	Missense	11	108143527	108143527	C	G	NM_000051.3	-	deleterious(0)	possibly_damaging(0.572)
ATM_S099	ATM	TCGA-17-Z016-01A-01W-0746-08	R1086L	cGc/cTc	3642	3257	1086	Missense_Mutation	Missense	11	108143552	108143552	G	T	NM_000051.3	COSM48240	deleterious(0.02)	benign(0.051)
ATM_S100	ATM	TCGA-27-2528-01A-01D-1494-08	S1092fs	TCAAtc/tc	3659-3662	3274-3277	1092-1093	Frame_Shift_Del	Truncating	11	108143569	108143572	TCAA	-	NM_000051.3	-	-	-
ATM_S101	ATM	TCGA-BR-8591-01A-11D-2394-08	R1095G	Aga/Gga	3668	3283	1095	Missense_Mutation	Missense	11	108143578	108143578	A	G	NM_000051.3	-	tolerated(0.08)	benign(0.206)
ATM_S102	ATM	TCGA-AA-3527-01A-01W-0831-10	Q1117P	cAa/cCa	3735	3350	1117	Missense_Mutation	Missense	11	108150283	108150283	A	C	NM_000051.3	COSM200662	tolerated(0.07)	benign(0.323)
ATM_S103	ATM	TCGA-EA-A3HU-01A-11D-A20U-09	L1125F	ttG/ttC	3760	3375	1125	Missense_Mutation	Missense	11	108150308	108150308	G	C	NM_000051.3	COSM357494	tolerated(0.12)	benign(0.013)
ATM_S104	ATM	TCGA-AG-A002-01A-01W-A005-10	R1150I	aGa/aTa	3834	3449	1150	Missense_Mutation	Missense	11	108151768	108151768	G	T	NM_000051.3	COSM172230	deleterious(0.05)	probably_damaging(0.977)
ATM_S105	ATM	TCGA-AG-3892-01	C1168	tgC/tgT	3889	3504	1168	Silent_Mutation	Silent	11	108151823	108151823	C	T	NM_000051.3	COSM256367	-	-
ATM_S106	ATM	TCGA-64-5774-01A-01D-1625-08	K1196*	Aaa/Taa	3971	3586	1196	Nonsense_Mutation	Truncating	11	108153446	108153446	A	T	NM_000051.3	COSM1139586,COSM540838	-	-
ATM_S107	ATM	TCGA-13-0726-01	D1208H	Gac/Cac	4007	3622	1208	Missense_Mutation	Missense	11	108153482	108153482	G	C	NM_000051.3	COSM1350835,COSM1350836,COSM73770	deleterious(0.03)	probably_damaging(0.971)
ATM_S108	ATM	TCGA-B0-4693-01A-01D-1361-10	S1212	tcT/tcA	4021	3636	1212	Silent_Mutation	Silent	11	108153496	108153496	T	A	NM_000051.3	-	-	-
ATM_S109	ATM	TCGA-AG-A002-01A-01W-A005-10	L1217M	Ctg/Atg	4034	3649	1217	Missense_Mutation	Missense	11	108153509	108153509	C	A	NM_000051.3	COSM170254	deleterious(0)	probably_damaging(0.989)
ATM_S110	ATM	TCGA-05-4382-01A-01D-1265-08	Q1225*	Caa/Taa	4058	3673	1225	Nonsense_Mutation	Truncating	11	108153533	108153533	C	T	NM_000051.3	CM031637	-	-
ATM_S111	ATM	TCGA-IR-A3LL-01A-11D-A20U-09	E1228K	Gaa/Aaa	4067	3682	1228	Missense_Mutation	Missense	11	108153542	108153542	G	A	NM_000051.3	-	tolerated(0.47)	benign(0.001)
ATM_S112	ATM	TCGA-AP-A056-01A-11W-A027-09	I1244	atT/atC	4117	3732	1244	Silent_Mutation	Silent	11	108153592	108153592	T	C	NM_000051.3	COSM1585355,COSM922717	-	-
ATM_S113	ATM	TCGA-BS-A0UF-01A-11D-A10B-09	F1247L	ttC/ttA	4126	3741	1247	Missense_Mutation	Missense	11	108153601	108153601	C	A	NM_000051.3	COSM1350843,COSM922718	deleterious(0)	possibly_damaging(0.837)
ATM_S114	ATM	TCGA-HD-7754-01A-11D-2078-08	Y1248C	tAt/tGt	4128	3743	1248	Missense_Mutation	Missense	11	108153603	108153603	A	G	NM_000051.3	-	deleterious(0)	possibly_damaging(0.806)
ATM_S115	ATM	TCGA-EE-A2A2-06A-11D-A196-08	V1268	gtG/gtA	4189	3804	1268	Silent_Mutation	Silent	11	108155011	108155011	G	A	NM_000051.3	-	-	-
ATM_S116	ATM	TCGA-AP-A056-01A-11W-A027-09	K1289N	aaG/aaT	4252	3867	1289	Missense_Mutation	Missense	11	108155074	108155074	G	T	NM_000051.3	COSM1585354,COSM922719	deleterious(0.01)	benign(0.313)
ATM_S117	ATM	TCGA-CD-A4MI-01A-21D-A25D-08	G1302	ggT/ggC	4291	3906	1302	Silent_Mutation	Silent	11	108155113	108155113	T	C	NM_000051.3	-	-	-
ATM_S118	ATM	TCGA-D3-A51G-06A-11D-A25O-08	R1312K	aGa/aAa	4320	3935	1312	Missense_Mutation	Missense	11	108155142	108155142	G	A	NM_000051.3	-	tolerated(0.21)	benign(0.099)
ATM_S119	ATM	TCGA-BR-6452-01A-12D-1800-08	V1318	gtC/gtA	4339	3954	1318	Silent_Mutation	Silent	11	108155161	108155161	C	A	NM_000051.3	-	-	-
ATM_S120	ATM	TCGA-A4-7997-01A-11D-2201-08	Q1331_splice	-	-	-	-	Splice_Site	Truncating	11	108155202	108155202	T	C	NM_000051.3	COSM1183954,COSM1183955	-	-
ATM_S121	ATM	TCGA-B5-A11G-01A-13D-A122-09	I1332_splice	-	-	-	-	Splice_Site	Truncating	11	108158326	108158326	G	T	NM_000051.3	COSM1585353,COSM922720	-	-
ATM_S122	ATM	TCGA-US-A776-01A-13D-A33T-08	L1347*	tTa/tGa	4425	4040	1347	Nonsense_Mutation	Truncating	11	108158373	108158373	T	G	NM_000051.3	-	-	-
ATM_S123	ATM	TCGA-17-Z026-01A-01W-0746-08	G1370_splice	-	-	-	-	Splice_Site	Truncating	11	108159697	108159697	C	G	NM_000051.3	-	-	-
ATM_S124	ATM	TCGA-49-4486-01A-01D-1265-08	F1381C	tTt/tGt	4527	4142	1381	Missense_Mutation	Missense	11	108159736	108159736	T	G	NM_000051.3	COSM1139588,COSM540836	deleterious(0)	probably_damaging(0.987)
ATM_S125	ATM	TCGA-GN-A266-06A-11D-A197-08	F1381	ttT/ttC	4528	4143	1381	Silent_Mutation	Silent	11	108159737	108159737	T	C	NM_000051.3	-	-	-
ATM_S126	ATM	TCGA-BS-A0UV-01A-11D-A10B-09	L1408I	Ctt/Att	4607	4222	1408	Missense_Mutation	Missense	11	108159816	108159816	C	A	NM_000051.3	COSM1585352,COSM259555	deleterious(0.01)	possibly_damaging(0.792)
ATM_S127	ATM	TCGA-CG-5721-01A-11D-1600-08	L1408F	Ctt/Ttt	4607	4222	1408	Missense_Mutation	Missense	11	108159816	108159816	C	T	NM_000051.3	COSM1585352,COSM259555	deleterious(0.01)	probably_damaging(0.963)
ATM_S128	ATM	TCGA-73-4659-01A-01D-1265-08	R1437*	Aga/Tga	4694	4309	1437	Nonsense_Mutation	Truncating	11	108160401	108160401	A	T	NM_000051.3	COSM1139589,COSM540835	-	-
ATM_S129	ATM	TCGA-C5-A1MK-01A-11D-A14W-08	R1437K	aGa/aAa	4695	4310	1437	Missense_Mutation	Missense	11	108160402	108160402	G	A	NM_000051.3	CM0910501	deleterious(0.05)	benign(0.255)
ATM_S130	ATM	TCGA-CN-4739-01A-02D-1512-08	I1438	atT/atC	4699	4314	1438	Silent_Mutation	Silent	11	108160406	108160406	T	C	NM_000051.3	-	-	-
ATM_S131	ATM	TCGA-BS-A0UV-01A-11D-A10B-09	L1439I	Ctt/Att	4700	4315	1439	Missense_Mutation	Missense	11	108160407	108160407	C	A	NM_000051.3	COSM1585351,COSM922721	tolerated(0.07)	benign(0.102)
ATM_S132	ATM	TCGA-BR-8361-01A-11D-2340-08	I1453fs	atA/at	4744	4359	1453	Frame_Shift_Del	Truncating	11	108160451	108160451	A	-	NM_000051.3	-	-	-
ATM_S133	ATM	TCGA-BT-A0YX-01A-11D-A10S-08	G1456D	gGc/gAc	4752	4367	1456	Missense_Mutation	Missense	11	108160459	108160459	G	A	NM_000051.3	COSM1133333,COSM415356	tolerated(0.07)	benign(0.309)
ATM_S134	ATM	TCGA-BR-8081-01A-11D-2340-08	W1461C	tgG/tgT	4768	4383	1461	Missense_Mutation	Missense	11	108160475	108160475	G	T	NM_000051.3	-	deleterious(0)	probably_damaging(0.991)
ATM_S135	ATM	TCGA-AG-A002-01A-01W-A005-10	R1466*	Cga/Tga	4781	4396	1466	Nonsense_Mutation	Truncating	11	108160488	108160488	C	T	NM_000051.3	CM990210,COSM171676	-	-
ATM_S136	ATM	TCGA-CG-5728-01A-11D-1600-08	R1466Q	cGa/cAa	4782	4397	1466	Missense_Mutation	Missense	11	108160489	108160489	G	A	NM_000051.3	COSM1183934,COSM1183935	tolerated(0.13)	possibly_damaging(0.756)
ATM_S137	ATM	TCGA-AG-A002-01A-01W-A005-10	L1488	ttA/ttG	4849	4464	1488	Silent_Mutation	Silent	11	108163373	108163373	A	G	NM_000051.3	COSM172739	-	-
ATM_S138	ATM	TCGA-AA-3530-01A-01W-0995-10	R1489H	cGt/cAt	4851	4466	1489	Missense_Mutation	Missense	11	108163375	108163375	G	A	NM_000051.3	rs201594549,COSM200666	deleterious(0.03)	benign(0.033)
ATM_S139	ATM	TCGA-GN-A266-06A-11D-A197-08	S1492	tcC/tcT	4861	4476	1492	Silent_Mutation	Silent	11	108163385	108163385	C	T	NM_000051.3	-	-	-
ATM_S140	ATM	TCGA-BR-6454-01A-11D-1800-08	Q1500*	Cag/Tag	4883	4498	1500	Nonsense_Mutation	Truncating	11	108163407	108163407	C	T	NM_000051.3	-	-	-
ATM_S141	ATM	TCGA-EE-A29E-06A-11D-A197-08	L1555	ctC/ctT	5050	4665	1555	Silent_Mutation	Silent	11	108164093	108164093	C	T	NM_000051.3	rs374431061	-	-
ATM_S142	ATM	TCGA-BR-6802-01A-11D-1882-08	L1561P	cTt/cCt	5067	4682	1561	Missense_Mutation	Missense	11	108164110	108164110	T	C	NM_000051.3	-	tolerated(0.27)	benign(0.304)
ATM_S143	ATM	TCGA-EJ-7784-01A-11D-2114-08	H1568L	cAt/cTt	5088	4703	1568	Missense_Mutation	Missense	11	108164131	108164131	A	T	NM_000051.3	rs368830730,COSM1470377,COSM1470378	tolerated(0.66)	benign(0.001)
ATM_S144	ATM	TCGA-A8-A07P-01A-11W-A019-09	R1575fs	ttGCgt/ttgt	5107-5108	4722-4723	1574-1575	Frame_Shift_Del	Truncating	11	108164150	108164151	GC	-	NM_000051.3	COSM1474988,COSM428359	-	-
ATM_S145	ATM	TCGA-A8-A07P-01A-11W-A019-09	R1575L	cGt/cTt	5109	4724	1575	Missense_Mutation	Missense	11	108164152	108164152	G	T	NM_000051.3	COSM1474989,COSM428360,CM0910508	deleterious(0.01)	possibly_damaging(0.556)
ATM_S146	ATM	TCGA-N7-A4Y0-01A-12D-A28R-08	L1617R	cTt/cGt	5235	4850	1617	Missense_Mutation	Missense	11	108165727	108165727	T	G	NM_000051.3	-	deleterious(0)	probably_damaging(0.921)
ATM_S147	ATM	TCGA-ND-A4WC-01A-21D-A28R-08	R1618*	Cga/Tga	5237	4852	1618	Nonsense_Mutation	Truncating	11	108165729	108165729	C	T	NM_000051.3	CM983653,COSM1350874,COSM1350875	-	-
ATM_S148	ATM	TCGA-D1-A15X-01A-11D-A122-09	M1644I	atG/atA	5317	4932	1644	Missense_Mutation	Missense	11	108168036	108168036	G	A	NM_000051.3	COSM1585350,COSM922723	tolerated(0.37)	benign(0.001)
ATM_S149	ATM	TCGA-BR-4361-01A-01D-1158-08	I1659M	atA/atG	5362	4977	1659	Missense_Mutation	Missense	11	108168081	108168081	A	G	NM_000051.3	rs199888434	tolerated(0.07)	benign(0.132)
ATM_S150	ATM	TCGA-AA-A010-01A-01W-A00E-09	E1666*	Gaa/Taa	5381	4996	1666	Nonsense_Mutation	Truncating	11	108168100	108168100	G	T	NM_000051.3	COSM279034	-	-
ATM_S151	ATM	TCGA-CH-5762-01A-11D-1576-08	G1672A	gGa/gCa	5400	5015	1672	Missense_Mutation	Missense	11	108170450	108170450	G	C	NM_000051.3	COSM371274,COSM1127934	tolerated(0.09)	benign(0.048)
ATM_S152	ATM	TCGA-F1-6874-01A-11D-1882-08	S1673	agC/agT	5404	5019	1673	Silent_Mutation	Silent	11	108170454	108170454	C	T	NM_000051.3	-	-	-
ATM_S153	ATM	TCGA-CJ-4904-01A-02D-1429-08	V1678G	gTg/gGg	5418	5033	1678	Missense_Mutation	Missense	11	108170468	108170468	T	G	NM_000051.3	COSM1135095,COSM466266	deleterious(0)	benign(0.209)
ATM_S154	ATM	TCGA-05-4396-01A-21D-1855-08	V1678	gtG/gtT	5419	5034	1678	Silent_Mutation	Silent	11	108170469	108170469	G	T	NM_000051.3	-	-	-
ATM_S155	ATM	TCGA-BS-A0UF-01A-11D-A10B-09	F1683V	Ttc/Gtc	5432	5047	1683	Missense_Mutation	Missense	11	108170482	108170482	T	G	NM_000051.3	COSM1585349,COSM922724	deleterious(0.05)	possibly_damaging(0.54)
ATM_S156	ATM	TCGA-E2-A10C-01A-21D-A10M-09	D1693N	Gat/Aat	5462	5077	1693	Missense_Mutation	Missense	11	108170512	108170512	G	A	NM_000051.3	COSM1474990,COSM428361	tolerated(0.25)	benign(0.008)
ATM_S157	ATM	TCGA-B5-A11E-01A-11D-A10M-09	T1711	acC/acT	5518	5133	1711	Silent_Mutation	Silent	11	108170568	108170568	C	T	NM_000051.3	COSM1585348,COSM922725	-	-
ATM_S158	ATM	TCGA-AA-A00N-01A-02W-A00E-09	R1730*	Cga/Tga	5573	5188	1730	Nonsense_Mutation	Truncating	11	108172385	108172385	C	T	NM_000051.3	CM990211,COSM1183960,COSM172204	-	-
ATM_S158	ATM	TCGA-AG-A002-01A-01W-A005-10	R1730*	Cga/Tga	5573	5188	1730	Nonsense_Mutation	Truncating	11	108172385	108172385	C	T	NM_000051.3	CM990211,COSM1183960,COSM172204	-	-
ATM_S159	ATM	TCGA-19-5950-01A-11D-1696-08	Y1753C	tAt/tGt	5643	5258	1753	Missense_Mutation	Missense	11	108172455	108172455	A	G	NM_000051.3	-	tolerated(0.11)	benign(0.005)
ATM_S160	ATM	TCGA-AP-A051-01A-21W-A027-09	A1762	gcC/gcA	5671	5286	1762	Silent_Mutation	Silent	11	108172483	108172483	C	A	NM_000051.3	COSM1585347,COSM922726	-	-
ATM_S161	ATM	TCGA-DD-A115-01A-11D-A12Z-10	R1768G	Aga/Gga	5687	5302	1768	Missense_Mutation	Missense	11	108172499	108172499	A	G	NM_000051.3	-	deleterious(0.01)	benign(0.339)
ATM_S162	ATM	TCGA-A5-A0GP-01A-11W-A062-09	E1783*	Gaa/Taa	5732	5347	1783	Nonsense_Mutation	Truncating	11	108173607	108173607	G	T	NM_000051.3	COSM1585346,COSM922727	-	-
ATM_S163	ATM	TCGA-AA-3860-01A-02W-0900-09	E1822*	Gaa/Taa	5849	5464	1822	Nonsense_Mutation	Truncating	11	108173724	108173724	G	T	NM_000051.3	COSM272064	-	-
ATM_S164	ATM	TCGA-QT-A5XP-01A-11D-A35D-08	Q1825	caA/caG	5860	5475	1825	Silent_Mutation	Silent	11	108173735	108173735	A	G	NM_000051.3	-	-	-
ATM_S165	ATM	TCGA-BG-A2AE-01A-11D-A16D-09	V1833_splice	-	-	-	-	Splice_Site	Truncating	11	108175401	108175401	G	A	NM_000051.3	COSM1152246,COSM922728	-	-
ATM_S166	ATM	TCGA-AA-3811-01A-01W-0995-10	F1837fs	Ttt/tt	5894	5509	1837	Frame_Shift_Del	Truncating	11	108175414	108175414	T	-	NM_000051.3	COSM200669	-	-
ATM_S167	ATM	TCGA-17-Z017-01A-01W-0746-08	F1837L	ttT/ttG	5896	5511	1837	Missense_Mutation	Missense	11	108175416	108175416	T	G	NM_000051.3	-	tolerated(0.14)	benign(0.049)
ATM_S168	ATM	TCGA-UB-A7MB-01A-11D-A33Q-10	H1847	caT/caC	5926	5541	1847	Silent_Mutation	Silent	11	108175446	108175446	T	C	NM_000051.3	-	-	-
ATM_S169	ATM	TCGA-GV-A3QI-01A-11D-A21Z-08	C1873	tgT/tgC	6004	5619	1873	Silent_Mutation	Silent	11	108175524	108175524	T	C	NM_000051.3	COSM1297604,COSM1297605	-	-
ATM_S170	ATM	TCGA-EE-A2M5-06A-12D-A197-08	S1881	agC/agT	6028	5643	1881	Silent_Mutation	Silent	11	108175548	108175548	C	T	NM_000051.3	-	-	-
ATM_S171	ATM	TCGA-49-6767-01A-11D-1855-08	--	-	-	-	-	intron_variant	intron_variant	11	108175670	108175670	G	T	NM_000051.3	-	-	-
ATM_S172	ATM	TCGA-17-Z060-01A-01W-0747-08	--	-	-	-	-	intron_variant	intron_variant	11	108178567	108178567	A	T	NM_000051.3	-	-	-
ATM_S173	ATM	TCGA-BR-8368-01A-11D-2340-08	K1903fs	Aaa/aa	6092	5707	1903	Frame_Shift_Del	Truncating	11	108178656	108178656	A	-	NM_000051.3	-	-	-
ATM_S174	ATM	TCGA-JW-A5VG-01A-11D-A28B-09	Q1919*	Caa/Taa	6140	5755	1919	Nonsense_Mutation	Truncating	11	108178704	108178704	C	T	NM_000051.3	-	-	-
ATM_S175	ATM	TCGA-EJ-5518-01A-01D-1576-08	L1936S	tTa/tCa	6192	5807	1936	Missense_Mutation	Missense	11	108180931	108180931	T	C	NM_000051.3	COSM1127930	deleterious(0)	possibly_damaging(0.897)
ATM_S176	ATM	TCGA-AP-A059-01A-21D-A122-09	V1941	gtT/gtC	6208	5823	1941	Silent_Mutation	Silent	11	108180947	108180947	T	C	NM_000051.3	COSM1350907,COSM922729	-	-
ATM_S177	ATM	TCGA-BG-A0MT-01A-11D-A10B-09	A1945fs	gCT/g	6219-6220	5834-5835	1945	Frame_Shift_Del	Truncating	11	108180958	108180959	CT	-	NM_000051.3	COSM1585345,COSM922730	-	-
ATM_S178	ATM	TCGA-05-4390-01A-02D-1753-08	E1979*	Gaa/Taa	6320	5935	1979	Nonsense_Mutation	Truncating	11	108183154	108183154	G	T	NM_000051.3	COSM1139591,COSM540833	-	-
ATM_S179	ATM	TCGA-B0-4690-01A-01D-1361-10	L1989S	tTg/tCg	6351	5966	1989	Missense_Mutation	Missense	11	108183185	108183185	T	C	NM_000051.3	-	tolerated(0.14)	possibly_damaging(0.566)
ATM_S180	ATM	TCGA-BH-A0B6-01A-11D-A19Y-09	G1998E	gGa/gAa	6378	5993	1998	Missense_Mutation	Missense	11	108183212	108183212	G	A	NM_000051.3	COSM1196601,COSM1196602	tolerated(0.08)	possibly_damaging(0.78)
ATM_S181	ATM	TCGA-41-3915-01A-01D-1353-08	I1999V	Ata/Gta	6380	5995	1999	Missense_Mutation	Missense	11	108183214	108183214	A	G	NM_000051.3	-	tolerated(0.15)	benign(0.044)
ATM_S182	ATM	TCGA-A5-A0GB-01A-11W-A062-09	D2003_splice	-	-	-	-	Splice_Site	Truncating	11	108186548	108186548	A	G	NM_000051.3	COSM1152247,COSM922731	-	-
ATM_S183	ATM	TCGA-B6-A0RV-01A-11D-A099-09	R2032_splice	-	-	-	-	Splice_Site	Truncating	11	108186737	108186737	G	A	NM_000051.3	COSM1133924,COSM27342,COSM428362	-	-
ATM_S184	ATM	TCGA-B5-A11E-01A-11D-A10M-09	R2034*	Cga/Tga	6485	6100	2034	Nonsense_Mutation	Truncating	11	108186742	108186742	C	T	NM_000051.3	CM960102,COSM1350936,COSM922732	-	-
ATM_S185	ATM	TCGA-AA-A022-01A-21W-A096-10	H2038	caC/caT	6499	6114	2038	Silent_Mutation	Silent	11	108186756	108186756	C	T	NM_000051.3	COSM200670	-	-
ATM_S186	ATM	TCGA-AA-3522-01A-01W-0831-10	E2039K	Gaa/Aaa	6500	6115	2039	Missense_Mutation	Missense	11	108186757	108186757	G	A	NM_000051.3	CM094668,COSM1561120,COSM200671	deleterious(0.02)	benign(0.288)
ATM_S187	ATM	TCGA-55-1595-01A-01D-0969-08	G2043V	gGc/gTc	6513	6128	2043	Missense_Mutation	Missense	11	108186770	108186770	G	T	NM_000051.3	COSM1139592,COSM540832	deleterious(0.01)	benign(0.421)
ATM_S188	ATM	TCGA-AA-3966-01A-01W-1073-09	R2060H	cGc/cAc	6564	6179	2060	Missense_Mutation	Missense	11	108186821	108186821	G	A	NM_000051.3	rs376521407,COSM272367	deleterious(0.03)	benign(0.022)
ATM_S189	ATM	TCGA-AP-A0LT-01A-11W-A062-09	A2062V	gCa/gTa	6570	6185	2062	Missense_Mutation	Missense	11	108186827	108186827	C	T	NM_000051.3	COSM1152248,COSM922733	tolerated(0.9)	benign(0.025)
ATM_S190	ATM	TCGA-AA-A00N-01A-02W-A00E-09	L2077I	Ctt/Att	6614	6229	2077	Missense_Mutation	Missense	11	108188130	108188130	C	A	NM_000051.3	COSM274077	tolerated(0.11)	possibly_damaging(0.792)
ATM_S191	ATM	TCGA-GV-A3QG-01A-11D-A21Z-08	E2094K	Gaa/Aaa	6665	6280	2094	Missense_Mutation	Missense	11	108188181	108188181	G	A	NM_000051.3	COSM1297608,COSM1297609	deleterious(0.02)	benign(0.206)
ATM_S192	ATM	TCGA-B5-A11G-01A-13D-A122-09	N2106K	aaT/aaA	6703	6318	2106	Missense_Mutation	Missense	11	108188219	108188219	T	A	NM_000051.3	COSM1585344,COSM922734	deleterious(0.03)	possibly_damaging(0.549)
ATM_S193	ATM	TCGA-D1-A16F-01A-11D-A12J-09	R2138fs	AGa/a	6797-6798	6412-6413	2138	Frame_Shift_Del	Truncating	11	108190745	108190746	AG	-	NM_000051.3	COSM1585343,COSM922735	-	-
ATM_S194	ATM	TCGA-A5-A0GP-01A-11W-A062-09	E2139D	gaA/gaC	6802	6417	2139	Missense_Mutation	Missense	11	108190750	108190750	A	C	NM_000051.3	COSM1585342,COSM922736	tolerated(0.46)	possibly_damaging(0.555)
ATM_S195	ATM	TCGA-AA-A010-01A-01W-A00E-09	F2140V	Ttc/Gtc	6803	6418	2140	Missense_Mutation	Missense	11	108190751	108190751	T	G	NM_000051.3	COSM279035	tolerated(0.07)	probably_damaging(0.949)
ATM_S196	ATM	TCGA-AX-A0J0-01A-11D-A117-09	F2140C	tTc/tGc	6804	6419	2140	Missense_Mutation	Missense	11	108190752	108190752	T	G	NM_000051.3	COSM1585341,COSM922737	deleterious(0.02)	probably_damaging(0.989)
ATM_S197	ATM	TCGA-AG-A002-01A-01W-A005-10	L2147I	Ctc/Atc	6824	6439	2147	Missense_Mutation	Missense	11	108190772	108190772	C	A	NM_000051.3	COSM174438	tolerated(0.22)	benign(0.381)
ATM_S198	ATM	TCGA-CD-5798-01A-11D-1600-08	R2151_splice	-	-	-	-	Splice_Site	Truncating	11	108192027	108192027	G	A	NM_000051.3	CD053525,COSM159252	-	-
ATM_S199	ATM	TCGA-A8-A07E-01A-11W-A050-09	E2164K	Gag/Aag	6875	6490	2164	Missense_Mutation	Missense	11	108192065	108192065	G	A	NM_000051.3	COSM1289459,COSM1350942,COSM1474991,COSM1350943,COSM22475,COSM1235405	deleterious(0)	probably_damaging(1)
ATM_S199	ATM	TCGA-EJ-5511-01A-01D-1576-08	E2164K	Gag/Aag	6875	6490	2164	Missense_Mutation	Missense	11	108192065	108192065	G	A	NM_000051.3	COSM1289459,COSM1350942,COSM1474991,COSM1350943,COSM22475,COSM1235405	deleterious(0)	probably_damaging(1)
ATM_S200	ATM	TCGA-DK-A3WW-01A-22D-A23M-08	E2164Q	Gag/Cag	6875	6490	2164	Missense_Mutation	Missense	11	108192065	108192065	G	C	NM_000051.3	COSM1289459,COSM1350942,COSM1474991,COSM1350943,COSM22475,COSM1235405	deleterious(0)	probably_damaging(1)
ATM_S201	ATM	TCGA-K4-A3WS-01A-11D-A22Z-08	E2164G	gAg/gGg	6876	6491	2164	Missense_Mutation	Missense	11	108192066	108192066	A	G	NM_000051.3	COSM1350944,COSM1350945	deleterious(0)	probably_damaging(1)
ATM_S202	ATM	TCGA-FR-A69P-06A-21D-A30X-08	S2168L	tCg/tTg	6888	6503	2168	Missense_Mutation	Missense	11	108192078	108192078	C	T	NM_000051.3	rs200431631	tolerated(0.06)	possibly_damaging(0.763)
ATM_S203	ATM	TCGA-FD-A3B5-01A-11D-A20D-08	R2191_splice	-	-	-	-	Splice_Site	Truncating	11	108196036	108196036	G	A	NM_000051.3	COSM1297610,COSM1297611	-	-
ATM_S204	ATM	TCGA-17-Z062-01A-01W-0747-08	M2239V	Atg/Gtg	7100	6715	2239	Missense_Mutation	Missense	11	108196179	108196179	A	G	NM_000051.3	-	tolerated(0.32)	benign(0.002)
ATM_S205	ATM	TCGA-AG-A002-01A-01W-A005-10	L2251I	Ctc/Atc	7136	6751	2251	Missense_Mutation	Missense	11	108196215	108196215	C	A	NM_000051.3	COSM172023	tolerated(0.25)	probably_damaging(0.922)
ATM_S206	ATM	TCGA-B8-4622-01A-02D-1553-08	T2264I	aCt/aTt	7176	6791	2264	Missense_Mutation	Missense	11	108196255	108196255	C	T	NM_000051.3	COSM1135096,COSM466267	tolerated(0.12)	benign(0.051)
ATM_S207	ATM	TCGA-AR-A255-01A-11D-A167-09	Q2269*	Cag/Tag	7190	6805	2269	Nonsense_Mutation	Truncating	11	108196269	108196269	C	T	NM_000051.3	COSM1474992,COSM1474993	-	-
ATM_S208	ATM	TCGA-DK-A3WW-01A-22D-A23M-08	E2272*	Gaa/Taa	7199	6814	2272	Nonsense_Mutation	Truncating	11	108196791	108196791	G	T	NM_000051.3	CM030779	-	-
ATM_S209	ATM	TCGA-D1-A17Q-01A-11D-A12J-09	L2345F	ttA/ttC	7420	7035	2345	Missense_Mutation	Missense	11	108198431	108198431	A	C	NM_000051.3	COSM1585340,COSM922739	deleterious(0.01)	probably_damaging(0.981)
ATM_S210	ATM	TCGA-AA-A010-01A-01W-A00E-09	P2353T	Cct/Act	7442	7057	2353	Missense_Mutation	Missense	11	108198453	108198453	C	A	NM_000051.3	COSM279036	deleterious(0.01)	probably_damaging(0.999)
ATM_S211	ATM	TCGA-IB-7651-01A-11D-2154-08	P2353H	cCt/cAt	7443	7058	2353	Missense_Mutation	Missense	11	108198454	108198454	C	A	NM_000051.3	-	deleterious(0)	probably_damaging(0.999)
ATM_S212	ATM	TCGA-B5-A0JR-01A-13W-A062-09	K2363N	aaG/aaT	7474	7089	2363	Missense_Mutation	Missense	11	108198485	108198485	G	T	NM_000051.3	COSM1152249,COSM922740	deleterious(0)	possibly_damaging(0.856)
ATM_S213	ATM	TCGA-BR-6452-01A-12D-1800-08	Y2398C	tAc/tGc	7578	7193	2398	Missense_Mutation	Missense	11	108199851	108199851	A	G	NM_000051.3	-	deleterious(0)	probably_damaging(0.987)
ATM_S214	ATM	TCGA-19-5955-01A-11D-1696-08	S2408fs	tcG/tc	7609	7224	2408	Frame_Shift_Del	Truncating	11	108199882	108199882	G	-	NM_000051.3	rs145747513	-	-
ATM_S215	ATM	TCGA-05-4244-01A-01D-1105-08	K2413Q	Aag/Cag	7622	7237	2413	Missense_Mutation	Missense	11	108199895	108199895	A	C	NM_000051.3	COSM1139593,COSM540831	deleterious(0.01)	probably_damaging(0.97)
ATM_S216	ATM	TCGA-25-2399-01	Q2414*	Caa/Taa	7625	7240	2414	Nonsense_Mutation	Truncating	11	108199898	108199898	C	T	NM_000051.3	COSM78875	-	-
ATM_S217	ATM	TCGA-CJ-5686-01A-11D-1669-08	R2419*	Aga/Tga	7640	7255	2419	Nonsense_Mutation	Truncating	11	108199913	108199913	A	T	NM_000051.3	COSM1135097,COSM466268	-	-
ATM_S218	ATM	TCGA-IR-A3LA-01A-11D-A22X-09	R2419T	aGa/aCa	7641	7256	2419	Missense_Mutation	Missense	11	108199914	108199914	G	C	NM_000051.3	-	tolerated(0.24)	benign(0.069)
ATM_S219	ATM	TCGA-AA-3678-01A-01W-0900-09	G2425fs	Ggt/gt	7658	7273	2425	Frame_Shift_Del	Truncating	11	108199931	108199931	G	-	NM_000051.3	COSM292900	-	-
ATM_S220	ATM	TCGA-EE-A2MN-06A-11D-A197-08	Q2433*	Cag/Tag	7682	7297	2433	Nonsense_Mutation	Truncating	11	108199955	108199955	C	T	NM_000051.3	-	-	-
ATM_S221	ATM	TCGA-AA-3819-01A-01W-0900-09	N2435K	aaC/aaG	7690	7305	2435	Missense_Mutation	Missense	11	108199963	108199963	C	G	NM_000051.3	CM092587,COSM270897	deleterious(0.02)	benign(0.297)
ATM_S222	ATM	TCGA-AN-A046-01A-21W-A050-09	Y2437C	tAc/tGc	7695	7310	2437	Missense_Mutation	Missense	11	108200943	108200943	A	G	NM_000051.3	COSM1289460,COSM1289461	deleterious(0.01)	probably_damaging(0.976)
ATM_S223	ATM	TCGA-A2-A0YK-01A-22D-A117-09	L2455	ctG/ctA	7750	7365	2455	Silent_Mutation	Silent	11	108200998	108200998	G	A	NM_000051.3	COSM1133925,COSM428363	-	-
ATM_S224	ATM	TCGA-IB-7651-01A-11D-2154-08	R2459C	Cgt/Tgt	7760	7375	2459	Missense_Mutation	Missense	11	108201008	108201008	C	T	NM_000051.3	COSM1315810	deleterious(0)	benign(0.344)
ATM_S225	ATM	TCGA-KN-8428-01A-11D-2310-10	R2461C	Cgc/Tgc	7766	7381	2461	Missense_Mutation	Missense	11	108201014	108201014	C	T	NM_000051.3	rs201314561	deleterious(0.02)	possibly_damaging(0.788)
ATM_S226	ATM	TCGA-BT-A3PK-01A-21D-A21Z-08	R2461P	cGc/cCc	7767	7382	2461	Missense_Mutation	Missense	11	108201015	108201015	G	C	NM_000051.3	-	tolerated(0.09)	possibly_damaging(0.699)
ATM_S227	ATM	TCGA-BR-7707-01A-11D-2053-08	W2491L	tGg/tTg	7857	7472	2491	Missense_Mutation	Missense	11	108201105	108201105	G	T	NM_000051.3	-	tolerated(0.11)	possibly_damaging(0.795)
ATM_S228	ATM	TCGA-CZ-5451-01A-01D-1501-10	N2494Y	Aat/Tat	7865	7480	2494	Missense_Mutation	Missense	11	108201113	108201113	A	T	NM_000051.3	COSM1135098,COSM466269	deleterious(0)	probably_damaging(0.997)
ATM_S229	ATM	TCGA-24-0980-01	D2507N	Gac/Aac	7904	7519	2507	Missense_Mutation	Missense	11	108202174	108202174	G	A	NM_000051.3	CD004352,COSM86701	tolerated(0.82)	benign(0.001)
ATM_S230	ATM	TCGA-D3-A51T-06A-11D-A25O-08	R2526K	aGa/aAa	7962	7577	2526	Missense_Mutation	Missense	11	108202232	108202232	G	A	NM_000051.3	-	deleterious(0.05)	probably_damaging(0.91)
ATM_S231	ATM	TCGA-FW-A3R5-06A-11D-A23B-08	V2540	gtC/gtT	8005	7620	2540	Silent_Mutation	Silent	11	108202275	108202275	C	T	NM_000051.3	-	-	-
ATM_S232	ATM	TCGA-AG-3892-01	L2557V	Ttg/Gtg	8054	7669	2557	Missense_Mutation	Missense	11	108202645	108202645	T	G	NM_000051.3	COSM256368	deleterious(0)	probably_damaging(0.979)
ATM_S233	ATM	TCGA-B5-A11E-01A-11D-A10M-09	L2561M	Ctg/Atg	8066	7681	2561	Missense_Mutation	Missense	11	108202657	108202657	C	A	NM_000051.3	COSM1585339,COSM922741	deleterious(0.01)	probably_damaging(0.962)
ATM_S234	ATM	TCGA-CG-5721-01A-11D-1600-08	N2567S	aAc/aGc	8085	7700	2567	Missense_Mutation	Missense	11	108202676	108202676	A	G	NM_000051.3	-	deleterious(0.01)	benign(0.269)
ATM_S235	ATM	TCGA-B0-5097-01A-01D-1421-08	R2580*	Aga/Tga	8123	7738	2580	Nonsense_Mutation	Truncating	11	108202714	108202714	A	T	NM_000051.3	COSM1135099,COSM466270	-	-
ATM_S236	ATM	TCGA-AX-A05Z-01A-11W-A027-09	R2598*	Cga/Tga	8177	7792	2598	Nonsense_Mutation	Truncating	11	108203492	108203492	C	T	NM_000051.3	rs138941496,CM960105,COSM1585338,COSM922742	-	-
ATM_S236	ATM	TCGA-BR-8680-01A-11D-2394-08	R2598*	Cga/Tga	8177	7792	2598	Nonsense_Mutation	Truncating	11	108203492	108203492	C	T	NM_000051.3	rs138941496,CM960105,COSM1585338,COSM922742	-	-
ATM_S237	ATM	TCGA-AA-3984-01A-02W-0995-10	R2598Q	cGa/cAa	8178	7793	2598	Missense_Mutation	Missense	11	108203493	108203493	G	A	NM_000051.3	rs140263969,CX030370,COSM297849	deleterious(0.01)	probably_damaging(0.979)
ATM_S238	ATM	TCGA-EE-A3AD-06A-11D-A196-08	L2623F	Ctt/Ttt	8252	7867	2623	Missense_Mutation	Missense	11	108203567	108203567	C	T	NM_000051.3	-	deleterious(0.01)	probably_damaging(0.917)
ATM_S239	ATM	TCGA-CZ-5451-01A-01D-1501-10	K2639fs	aaG/aa	8302	7917	2639	Frame_Shift_Del	Truncating	11	108203617	108203617	G	-	NM_000051.3	-	-	-
ATM_S240	ATM	TCGA-A8-A0A6-01A-12W-A071-09	D2650A	gAc/gCc	8334	7949	2650	Missense_Mutation	Missense	11	108204634	108204634	A	C	NM_000051.3	-	deleterious(0.03)	benign(0.15)
ATM_S241	ATM	TCGA-05-4396-01A-21D-1855-08	P2665T	Cct/Act	8378	7993	2665	Missense_Mutation	Missense	11	108204678	108204678	C	A	NM_000051.3	-	deleterious(0.01)	probably_damaging(0.999)
ATM_S242	ATM	TCGA-AA-3977-01A-01W-0995-10	E2676*	Gaa/Taa	8411	8026	2676	Nonsense_Mutation	Truncating	11	108205711	108205711	G	T	NM_000051.3	COSM200672	-	-
ATM_S243	ATM	TCGA-A5-A0GP-01A-11W-A062-09	I2683M	atA/atG	8434	8049	2683	Missense_Mutation	Missense	11	108205734	108205734	A	G	NM_000051.3	COSM1585337,COSM922743	deleterious(0)	possibly_damaging(0.671)
ATM_S244	ATM	TCGA-D1-A16Y-01A-31D-A12J-09	S2685*	tCa/tAa	8439	8054	2685	Nonsense_Mutation	Truncating	11	108205739	108205739	C	A	NM_000051.3	COSM1585336,COSM922744	-	-
ATM_S245	ATM	TCGA-CD-8534-01A-11D-2340-08	F2686C	tTt/tGt	8442	8057	2686	Missense_Mutation	Missense	11	108205742	108205742	T	G	NM_000051.3	-	deleterious(0)	probably_damaging(0.997)
ATM_S246	ATM	TCGA-AP-A056-01A-11W-A027-09	R2691C	Cgc/Tgc	8456	8071	2691	Missense_Mutation	Missense	11	108205756	108205756	C	T	NM_000051.3	CM035637,COSM1176661,COSM922745	deleterious(0)	possibly_damaging(0.582)
ATM_S246	ATM	TCGA-BS-A0UV-01A-11D-A10B-09	R2691C	Cgc/Tgc	8456	8071	2691	Missense_Mutation	Missense	11	108205756	108205756	C	T	NM_000051.3	CM035637,COSM1176661,COSM922745	deleterious(0)	possibly_damaging(0.582)
ATM_S246	ATM	TCGA-EE-A2A6-06A-11D-A197-08	R2691C	Cgc/Tgc	8456	8071	2691	Missense_Mutation	Missense	11	108205756	108205756	C	T	NM_000051.3	CM035637,COSM1176661,COSM922745	deleterious(0)	possibly_damaging(0.582)
ATM_S247	ATM	TCGA-B5-A11U-01A-11D-A122-09	2693_2694AG>A	gcAGGa/gca	8464-8466	8079-8081	2693-2694	In_Frame_Del	Missense	11	108205764	108205766	AGG	-	NM_000051.3	COSM1585335,COSM265665	-	-
ATM_S247	ATM	TCGA-AA-3664-01A-01W-0900-09	2693_2694AG>A	gcAGGa/gca	8464-8466	8079-8081	2693-2694	In_Frame_Del	Missense	11	108205764	108205766	AGG	-	NM_000051.3	COSM1585335,COSM265665	-	-
ATM_S248	ATM	TCGA-HC-8260-01A-11D-2260-08	G2694R	Gga/Aga	8465	8080	2694	Missense_Mutation	Missense	11	108205765	108205765	G	A	NM_000051.3	-	deleterious(0)	probably_damaging(1)
ATM_S249	ATM	TCGA-05-4390-01A-02D-1753-08	G2695S	Ggt/Agt	8468	8083	2695	Missense_Mutation	Missense	11	108205768	108205768	G	A	NM_000051.3	COSM1139595,COSM1139596,COSM540829,COSM540828	deleterious(0)	probably_damaging(1)
ATM_S249	ATM	TCGA-CH-5737-01A-11D-1576-08	G2695S	Ggt/Agt	8468	8083	2695	Missense_Mutation	Missense	11	108205768	108205768	G	A	NM_000051.3	COSM1139595,COSM1139596,COSM540829,COSM540828	deleterious(0)	probably_damaging(1)
ATM_S250	ATM	TCGA-55-6642-01A-11D-1855-08	G2695C	Ggt/Tgt	8468	8083	2695	Missense_Mutation	Missense	11	108205768	108205768	G	T	NM_000051.3	COSM1139595,COSM1139596,COSM540829,COSM540828	deleterious(0)	probably_damaging(1)
ATM_S251	ATM	TCGA-17-Z014-01A-01W-0746-08	D2708N	Gat/Aat	8507	8122	2708	Missense_Mutation	Missense	11	108205807	108205807	G	A	NM_000051.3	CM063855,COSM48246	deleterious(0)	probably_damaging(0.953)
ATM_S252	ATM	TCGA-BP-5173-01A-01D-1429-08	G2718R	Ggc/Cgc	8537	8152	2718	Missense_Mutation	Missense	11	108206572	108206572	G	C	NM_000051.3	-	deleterious(0)	probably_damaging(0.997)
ATM_S253	ATM	TCGA-A2-A0YK-01A-22D-A117-09	D2720N	Gat/Aat	8543	8158	2720	Missense_Mutation	Missense	11	108206578	108206578	G	A	NM_000051.3	COSM1139597,COSM1133926,COSM428364,COSM540827	tolerated(0.06)	possibly_damaging(0.873)
ATM_S254	ATM	TCGA-49-4507-01A-01D-1265-08	D2720H	Gat/Cat	8543	8158	2720	Missense_Mutation	Missense	11	108206578	108206578	G	C	NM_000051.3	COSM1139597,COSM1133926,COSM428364,COSM540827	deleterious(0)	probably_damaging(0.997)
ATM_S255	ATM	TCGA-AA-A02Y-01A-43W-A096-10	D2721N	Gac/Aac	8546	8161	2721	Missense_Mutation	Missense	11	108206581	108206581	G	A	NM_000051.3	COSM200673	deleterious(0)	probably_damaging(1)
ATM_S256	ATM	TCGA-AP-A059-01A-21D-A122-09	L2722M	Ctg/Atg	8549	8164	2722	Missense_Mutation	Missense	11	108206584	108206584	C	A	NM_000051.3	COSM1585334,COSM922746	deleterious(0.05)	probably_damaging(0.973)
ATM_S256	ATM	TCGA-BS-A0UJ-01A-12D-A10B-09	L2722M	Ctg/Atg	8549	8164	2722	Missense_Mutation	Missense	11	108206584	108206584	C	A	NM_000051.3	COSM1585334,COSM922746	deleterious(0.05)	probably_damaging(0.973)
ATM_S257	ATM	TCGA-CZ-4861-01A-01D-1373-10	D2725G	gAt/gGt	8559	8174	2725	Missense_Mutation	Missense	11	108206594	108206594	A	G	NM_000051.3	COSM21882,COSM22481	deleterious(0.01)	probably_damaging(0.995)
ATM_S258	ATM	TCGA-FJ-A3ZE-01A-11D-A23M-08	A2726	gcT/gcA	8563	8178	2726	Silent_Mutation	Silent	11	108206598	108206598	T	A	NM_000051.3	rs367575159	-	-
ATM_S259	ATM	TCGA-CV-6950-01A-11D-1912-08	K2749N	aaA/aaC	8632	8247	2749	Missense_Mutation	Missense	11	108206667	108206667	A	C	NM_000051.3	-	deleterious(0.01)	possibly_damaging(0.62)
ATM_S260	ATM	TCGA-D1-A16X-01A-11D-A12J-09	L2750	Tta/Cta	8633	8248	2750	Silent_Mutation	Silent	11	108206668	108206668	T	C	NM_000051.3	COSM1585333,COSM922747	-	-
ATM_S261	ATM	TCGA-DA-A1I5-06A-11D-A197-08	P2759S	Ccc/Tcc	8660	8275	2759	Missense_Mutation	Missense	11	108213955	108213955	C	T	NM_000051.3	-	deleterious(0)	probably_damaging(0.999)
ATM_S262	ATM	TCGA-BR-8680-01A-11D-2394-08	R2763*	Cga/Tga	8672	8287	2763	Nonsense_Mutation	Truncating	11	108213967	108213967	C	T	NM_000051.3	CM080077,COSM1183942,COSM1183943	-	-
ATM_S263	ATM	TCGA-BA-4078-01A-01D-1434-08	E2768	gaA/gaG	8689	8304	2768	Silent_Mutation	Silent	11	108213984	108213984	A	G	NM_000051.3	-	-	-
ATM_S264	ATM	TCGA-AA-3664-01A-01W-0900-09	W2769*	tgG/tgA	8692	8307	2769	Nonsense_Mutation	Truncating	11	108213987	108213987	G	A	NM_000051.3	CM960109,COSM265664	-	-
ATM_S265	ATM	TCGA-AA-3516-01A-02W-0833-10	T2771I	aCa/aTa	8697	8312	2771	Missense_Mutation	Missense	11	108213992	108213992	C	T	NM_000051.3	COSM200677	tolerated(0.06)	possibly_damaging(0.449)
ATM_S266	ATM	TCGA-AP-A056-01A-11W-A027-09	L2780I	Ctt/Att	8723	8338	2780	Missense_Mutation	Missense	11	108214018	108214018	C	A	NM_000051.3	COSM1585332,COSM922748	deleterious(0)	probably_damaging(1)
ATM_S267	ATM	TCGA-E2-A1IE-01A-11D-A188-09	L2780R	cTt/cGt	8724	8339	2780	Missense_Mutation	Missense	11	108214019	108214019	T	G	NM_000051.3	COSM1474995,COSM1474996	deleterious(0)	probably_damaging(1)
ATM_S267	ATM	TCGA-IB-7651-01A-11D-2154-08	L2780R	cTt/cGt	8724	8339	2780	Missense_Mutation	Missense	11	108214019	108214019	T	G	NM_000051.3	COSM1474995,COSM1474996	deleterious(0)	probably_damaging(1)
ATM_S268	ATM	TCGA-HC-A4ZV-01A-11D-A26M-08	G2786S	Ggt/Agt	8741	8356	2786	Missense_Mutation	Missense	11	108214036	108214036	G	A	NM_000051.3	-	deleterious(0)	probably_damaging(0.999)
ATM_S269	ATM	TCGA-BR-7717-01A-11D-2053-08	R2790K	aGa/aAa	8754	8369	2790	Missense_Mutation	Missense	11	108214049	108214049	G	A	NM_000051.3	-	tolerated(0.16)	possibly_damaging(0.759)
ATM_S270	ATM	TCGA-B5-A0JY-01A-11D-A10B-09	S2812Y	tCt/tAt	8820	8435	2812	Missense_Mutation	Missense	11	108216486	108216486	C	A	NM_000051.3	COSM1561116,COSM922749	tolerated(0.24)	possibly_damaging(0.781)
ATM_S270	ATM	TCGA-BR-8680-01A-11D-2394-08	S2812Y	tCt/tAt	8820	8435	2812	Missense_Mutation	Missense	11	108216486	108216486	C	A	NM_000051.3	COSM1561116,COSM922749	tolerated(0.24)	possibly_damaging(0.781)
ATM_S271	ATM	TCGA-AC-A3W6-01A-12D-A228-09	E2814K	Gaa/Aaa	8825	8440	2814	Missense_Mutation	Missense	11	108216491	108216491	G	A	NM_000051.3	-	tolerated(0.05)	possibly_damaging(0.826)
ATM_S272	ATM	TCGA-DK-A3IK-01A-32D-A21A-08	E2815K	Gag/Aag	8828	8443	2815	Missense_Mutation	Missense	11	108216494	108216494	G	A	NM_000051.3	COSM1297612,COSM1297613	deleterious(0.02)	possibly_damaging(0.688)
ATM_S273	ATM	TCGA-BS-A0UV-01A-11D-A10B-09	V2819	gtC/gtA	8842	8457	2819	Silent_Mutation	Silent	11	108216508	108216508	C	A	NM_000051.3	COSM1585330,COSM1585331,COSM922750,COSM922751	-	-
ATM_S274	ATM	TCGA-D1-A16X-01A-11D-A12J-09	V2819	gtC/gtT	8842	8457	2819	Silent_Mutation	Silent	11	108216508	108216508	C	T	NM_000051.3	COSM1585330,COSM1585331,COSM922750,COSM922751	-	-
ATM_S275	ATM	TCGA-BR-8680-01A-11D-2394-08	Q2828K	Caa/Aaa	8867	8482	2828	Missense_Mutation	Missense	11	108216533	108216533	C	A	NM_000051.3	-	tolerated(0.46)	benign(0.004)
ATM_S276	ATM	TCGA-BR-6566-01A-11D-1800-08	R2832C	Cgt/Tgt	8879	8494	2832	Missense_Mutation	Missense	11	108216545	108216545	C	T	NM_000051.3	CM980159,COSM1351027,COSM385113,COSM22488	deleterious(0)	probably_damaging(0.993)
ATM_S277	ATM	TCGA-AA-3555-01A-01W-0831-10	F2839L	ttC/ttA	8902	8517	2839	Missense_Mutation	Missense	11	108216568	108216568	C	A	NM_000051.3	COSM200681	deleterious(0.01)	probably_damaging(0.996)
ATM_S278	ATM	TCGA-AX-A0J1-01A-11W-A062-09	R2849*	Cga/Tga	8930	8545	2849	Nonsense_Mutation	Truncating	11	108216596	108216596	C	T	NM_000051.3	CM990221,COSM1585329,COSM922752	-	-
ATM_S279	ATM	TCGA-CJ-4639-01A-02D-1386-10	T2853R	aCg/aGg	8943	8558	2853	Missense_Mutation	Missense	11	108216609	108216609	C	G	NM_000051.3	rs141534716,COSM1152250,COSM922753	deleterious(0)	probably_damaging(0.997)
ATM_S280	ATM	TCGA-AP-A0LT-01A-11W-A062-09	T2853M	aCg/aTg	8943	8558	2853	Missense_Mutation	Missense	11	108216609	108216609	C	T	NM_000051.3	rs141534716,COSM1152250,COSM922753	deleterious(0)	probably_damaging(0.999)
ATM_S280	ATM	TCGA-KL-8324-01A-11D-2310-10	T2853M	aCg/aTg	8943	8558	2853	Missense_Mutation	Missense	11	108216609	108216609	C	T	NM_000051.3	rs141534716,COSM1152250,COSM922753	deleterious(0)	probably_damaging(0.999)
ATM_S281	ATM	TCGA-71-6725-01A-11D-1855-08	--	-	-	-	-	intron_variant	intron_variant	11	108216783	108216783	T	G	NM_000051.3	-	-	-
ATM_S282	ATM	TCGA-BS-A0TC-01A-11D-A10B-09	L2866I	Ctt/Att	8981	8596	2866	Missense_Mutation	Missense	11	108218017	108218017	C	A	NM_000051.3	rs368666328,COSM1585328,COSM922754	tolerated(0.09)	possibly_damaging(0.872)
ATM_S283	ATM	TCGA-AA-A01R-01A-21W-A096-10	H2872R	cAt/cGt	9000	8615	2872	Missense_Mutation	Missense	11	108218036	108218036	A	G	NM_000051.3	COSM200683	deleterious(0)	probably_damaging(1)
ATM_S284	ATM	TCGA-EW-A1J6-01A-11D-A188-09	N2875S	aAt/aGt	9009	8624	2875 (shallow del)	Missense_Mutation	Missense	11	108218045	108218045	A	G	NM_000051.3	COSM1183938,COSM1627759,COSM307308,COSM1183939,CM102244	deleterious(0)	probably_damaging(1)
ATM_S285	ATM	TCGA-G9-7521-01A-11D-2260-08	N2875K	aaT/aaA	9010	8625	2875	Missense_Mutation	Missense	11	108218046	108218046	T	A	NM_000051.3	COSM1470375,COSM1470376	deleterious(0)	probably_damaging(1)
ATM_S286	ATM	TCGA-50-5049-01A-01D-1625-08	L2877	ttG/ttA	9016	8631	2877	Silent_Mutation	Silent	11	108218052	108218052	G	A	NM_000051.3	COSM1139598,COSM540824	-	-
ATM_S287	ATM	TCGA-K4-A3WU-01B-11D-A23M-08	E2884Q	Gaa/Caa	9035	8650	2884	Missense_Mutation	Missense	11	108218071	108218071	G	C	NM_000051.3	-	deleterious(0)	probably_damaging(0.982)
ATM_S288	ATM	TCGA-DD-A118-01A-11D-A12Z-10	L2885H	cTt/cAt	9039	8654	2885	Missense_Mutation	Missense	11	108218075	108218075	T	A	NM_000051.3	-	deleterious(0)	probably_damaging(0.999)
ATM_S289	ATM	TCGA-CU-A0YR-01A-12D-A10S-08	I2888L	Ata/Tta	9047	8662	2888	Missense_Mutation	Missense	11	108218083	108218083	A	T	NM_000051.3	COSM1133334,COSM415350	deleterious(0)	probably_damaging(1)
ATM_S290	ATM	TCGA-CG-4301-01A-01D-1158-08	L2890V	Cta/Gta	9053	8668	2890	Missense_Mutation	Missense	11	108218089	108218089	C	G	NM_000051.3	COSM1351036,COSM1351037,COSM22485	deleterious(0.01)	probably_damaging(0.999)
ATM_S291	ATM	TCGA-05-4417-01A-22D-1855-08	L2890R	cTa/cGa	9054	8669	2890	Missense_Mutation	Missense	11	108218090	108218090	T	G	NM_000051.3	COSM1139599,COSM540823	deleterious(0)	probably_damaging(1)
ATM_S292	ATM	TCGA-AG-3600-01A-01W-0833-10	G2891R	Ggt/Cgt	9056	8671	2891	Missense_Mutation	Missense	11	108218092	108218092	G	C	NM_000051.3	COSM168512	deleterious(0)	probably_damaging(1)
ATM_S293	ATM	TCGA-CN-5364-01A-01D-1434-08	I2899M	atC/atG	9082	8697	2899	Missense_Mutation	Missense	11	108224518	108224518	C	G	NM_000051.3	-	deleterious(0.02)	probably_damaging(0.99)
ATM_S294	ATM	TCGA-EE-A3AF-06A-11D-A196-08	I2899	atC/atT	9082	8697	2899	Silent_Mutation	Silent	11	108224518	108224518	C	T	NM_000051.3	-	-	-
ATM_S295	ATM	TCGA-GN-A265-06A-21D-A197-08	R2929_splice	-	-	-	-	Splice_Site	Truncating	11	108225536	108225536	A	G	NM_000051.3	-	-	-
ATM_S296	ATM	TCGA-IB-7651-01A-11D-2154-08	T2934I	aCc/aTc	9186	8801	2934	Missense_Mutation	Missense	11	108225552	108225552	C	T	NM_000051.3	-	deleterious(0)	probably_damaging(0.997)
ATM_S297	ATM	TCGA-EE-A3AF-06A-11D-A196-08	V2937G	gTg/gGg	9195	8810	2937	Missense_Mutation	Missense	11	108225561	108225561	T	G	NM_000051.3	COSM1470373,COSM1470374	deleterious(0.01)	probably_damaging(0.998)
ATM_S297	ATM	TCGA-G9-7510-01A-11D-2260-08	V2937G	gTg/gGg	9195	8810	2937	Missense_Mutation	Missense	11	108225561	108225561	T	G	NM_000051.3	COSM1470373,COSM1470374	deleterious(0.01)	probably_damaging(0.998)
ATM_S298	ATM	TCGA-ND-A4WC-01A-21D-A28R-08	L2952I	Ctt/Att	9239	8854	2952	Missense_Mutation	Missense	11	108235812	108235812	C	A	NM_000051.3	COSM1127926	deleterious(0)	probably_damaging(0.998)
ATM_S299	ATM	TCGA-EJ-5507-01A-01D-1576-08	L2952F	Ctt/Ttt	9239	8854	2952	Missense_Mutation	Missense	11	108235812	108235812	C	T	NM_000051.3	COSM1127926	deleterious(0)	probably_damaging(0.993)
ATM_S300	ATM	TCGA-13-1501-01	Y2954C	tAt/tGt	9246	8861	2954	Missense_Mutation	Missense	11	108235819	108235819	A	G	NM_000051.3	COSM1289465,COSM69745	deleterious(0)	probably_damaging(0.97)
ATM_S301	ATM	TCGA-BR-A4J7-01A-31D-A25D-08	Q2971*	Cag/Tag	9296	8911	2971	Nonsense_Mutation	Truncating	11	108235869	108235869	C	T	NM_000051.3	-	-	-
ATM_S302	ATM	TCGA-D9-A6EA-06A-11D-A30X-08	T2983S	aCt/aGt	9333	8948	2983	Missense_Mutation	Missense	11	108235906	108235906	C	G	NM_000051.3	-	tolerated(0.19)	benign(0.117)
ATM_S303	ATM	TCGA-AO-A0JM-01A-21W-A071-09	R2993*	Cga/Tga	9362	8977	2993	Nonsense_Mutation	Truncating	11	108235935	108235935	C	T	NM_000051.3	CM960113,COSM1474997,COSM428365	-	-
ATM_S303	ATM	TCGA-AX-A0J1-01A-11W-A062-09	R2993*	Cga/Tga	9362	8977	2993	Nonsense_Mutation	Truncating	11	108235935	108235935	C	T	NM_000051.3	CM960113,COSM1474997,COSM428365	-	-
ATM_S303	ATM	TCGA-BH-A18G-01A-11D-A12B-09	R2993*	Cga/Tga	9362	8977	2993	Nonsense_Mutation	Truncating	11	108235935	108235935	C	T	NM_000051.3	CM960113,COSM1474997,COSM428365	-	-
ATM_S304	ATM	TCGA-CX-7219-01A-11D-2012-08	D2997N	Gat/Aat	9374	8989	2997	Missense_Mutation	Missense	11	108236053	108236053	G	A	NM_000051.3	-	tolerated(0.12)	benign(0.011)
ATM_S305	ATM	TCGA-G2-A3IE-01A-11D-A20D-08	Q3000H	caG/caC	9385	9000	3000	Missense_Mutation	Missense	11	108236064	108236064	G	C	NM_000051.3	COSM1297616,COSM1297617	deleterious(0.01)	benign(0.027)
ATM_S306	ATM	TCGA-BP-4964-01A-01D-1462-08	K3004E	Aaa/Gaa	9395	9010	3004	Missense_Mutation	Missense	11	108236074	108236074	A	G	NM_000051.3	COSM1135102,COSM466274	deleterious(0.03)	possibly_damaging(0.517)
ATM_S307	ATM	TCGA-G2-A3IE-01A-11D-A20D-08	E3007K	Gaa/Aaa	9404	9019	3007	Missense_Mutation	Missense	11	108236083	108236083	G	A	NM_000051.3	CM980162,COSM1297618,COSM1297619	deleterious(0.01)	possibly_damaging(0.521)
ATM_S308	ATM	TCGA-CG-5721-01A-11D-1600-08	R3008C	Cgt/Tgt	9407	9022	3008	Missense_Mutation	Missense	11	108236086	108236086	C	T	NM_000051.3	CM000656,COSM1351056,COSM1561109,COSM1561110,COSM21642	deleterious(0)	probably_damaging(0.988)
ATM_S309	ATM	TCGA-67-6215-01A-11D-1753-08	R3008H	cGt/cAt	9408	9023	3008	Missense_Mutation	Missense	11	108236087	108236087	G	A	NM_000051.3	CM092589,COSM1139600,COSM356707,COSM21626	deleterious(0.01)	probably_damaging(0.97)
ATM_S310	ATM	TCGA-DS-A5RQ-01A-11D-A28B-09	L3010fs	ttA/tt	9415	9030	3010	Frame_Shift_Del	Truncating	11	108236094	108236094	A	-	NM_000051.3	-	-	-
ATM_S311	ATM	TCGA-49-4510-01A-01D-1265-08	E3015*	Gag/Tag	9428	9043	3015	Nonsense_Mutation	Truncating	11	108236107	108236107	G	T	NM_000051.3	COSM1139601,COSM540821	-	-
ATM_S312	ATM	TCGA-G2-A3IE-01A-11D-A20D-08	E3022*	Gaa/Taa	9449	9064	3022	Nonsense_Mutation	Truncating	11	108236128	108236128	G	T	NM_000051.3	COSM1297620,COSM1297621	-	-
ATM_S313	ATM	TCGA-OR-A5KB-01A-11D-A30A-10	S3027I	aGt/aTt	9465	9080	3027	Missense_Mutation	Missense	11	108236144	108236144	G	T	NM_000051.3	-	deleterious(0)	probably_damaging(0.996)
ATM_S314	ATM	TCGA-G2-A3IE-01A-11D-A20D-08	V3032	gtG/gtA	9481	9096	3032	Silent_Mutation	Silent	11	108236160	108236160	G	A	NM_000051.3	COSM1297622,COSM1297623	-	-
ATM_S315	ATM	TCGA-BG-A0M4-01A-11W-A10C-09	R3047*	Cga/Tga	9524	9139	3047	Nonsense_Mutation	Truncating	11	108236203	108236203	C	T	NM_000051.3	rs121434219,CM960114,COSM1152251,COSM21624	-	-
ATM_S316	ATM	TCGA-EE-A2M5-06A-12D-A197-08	F3049	ttC/ttT	9532	9147	3049	Silent_Mutation	Silent	11	108236211	108236211	C	T	NM_000051.3	-	-	-
The reference is hg19
