# Supplementary figures and images for: Kinase-dead ATM protein is highly oncogenic and can be preferentially targeted by Topo-isomerase I inhibitors
Source: eLife journal article supplement (doi:10.7554/elife.14709), 2016-06-15

# Figure 6-figure supplementary 1

**A.**

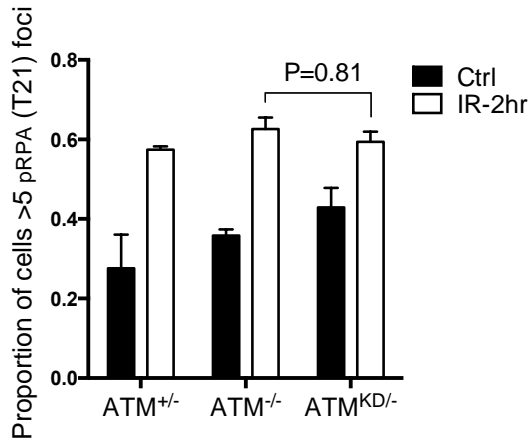

**B.**

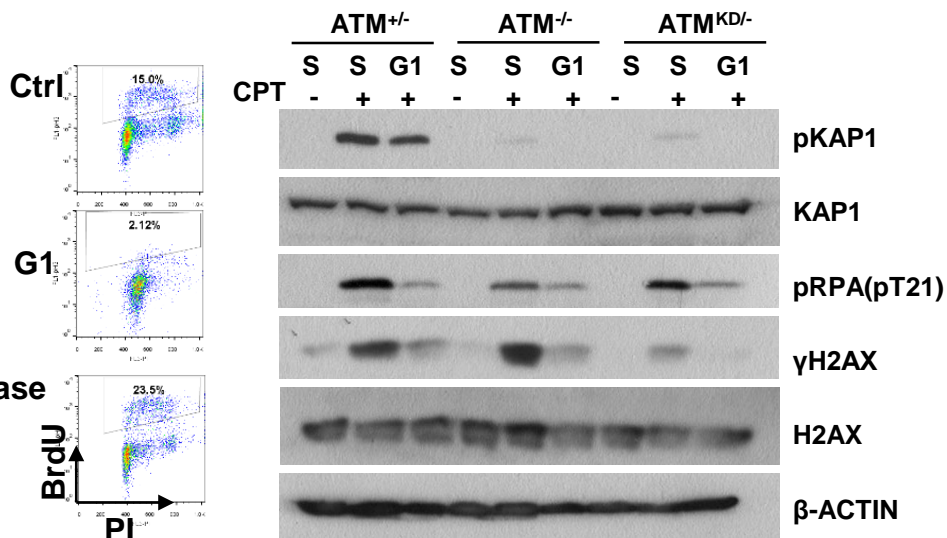

Supplement: supp [file elife-14709-supp-v1.zip]

# Figure 5-figure supplementary 1

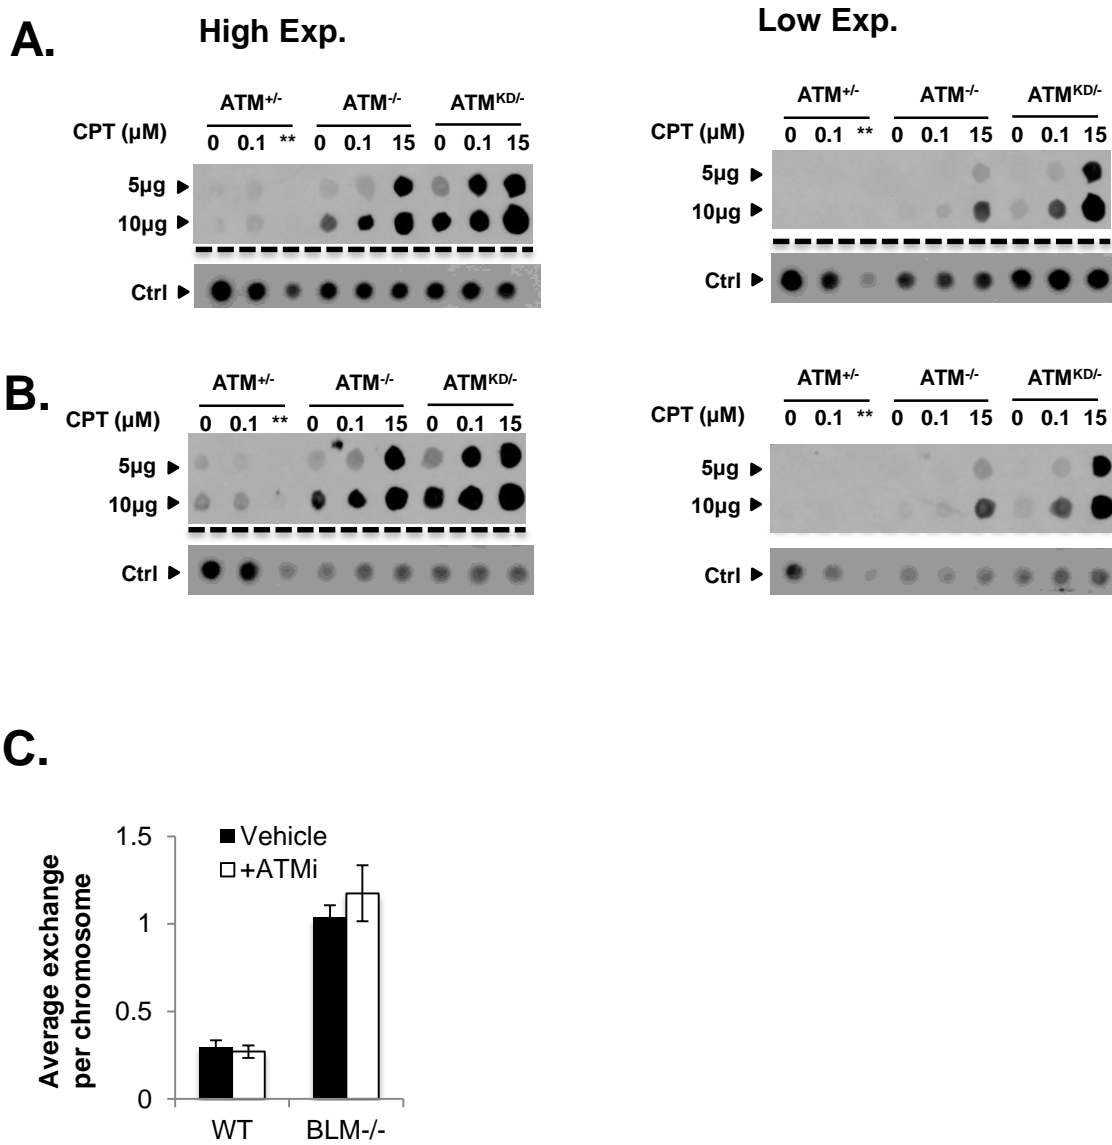

Supplement: supp [file elife-14709-supp-v1.zip]

# Figure 4-figure supplementary 1

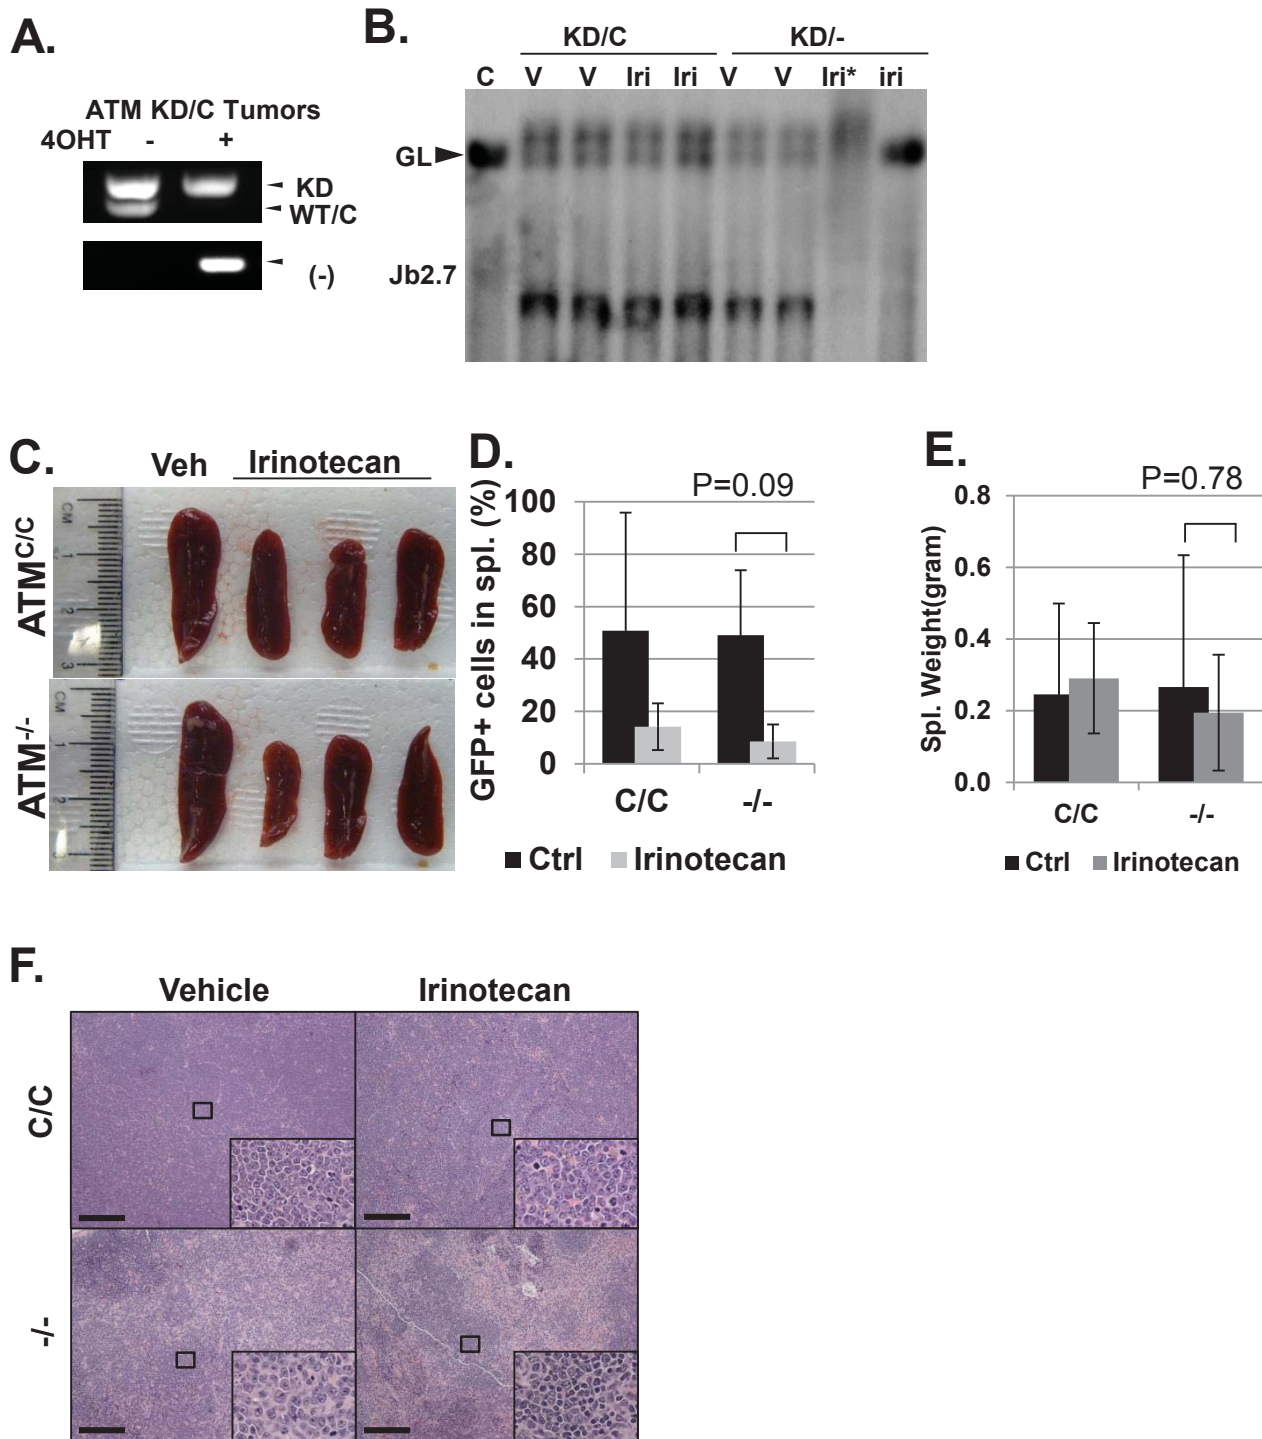

Supplement: supp [file elife-14709-supp-v1.zip]

Figure1\_figure supplementary 1

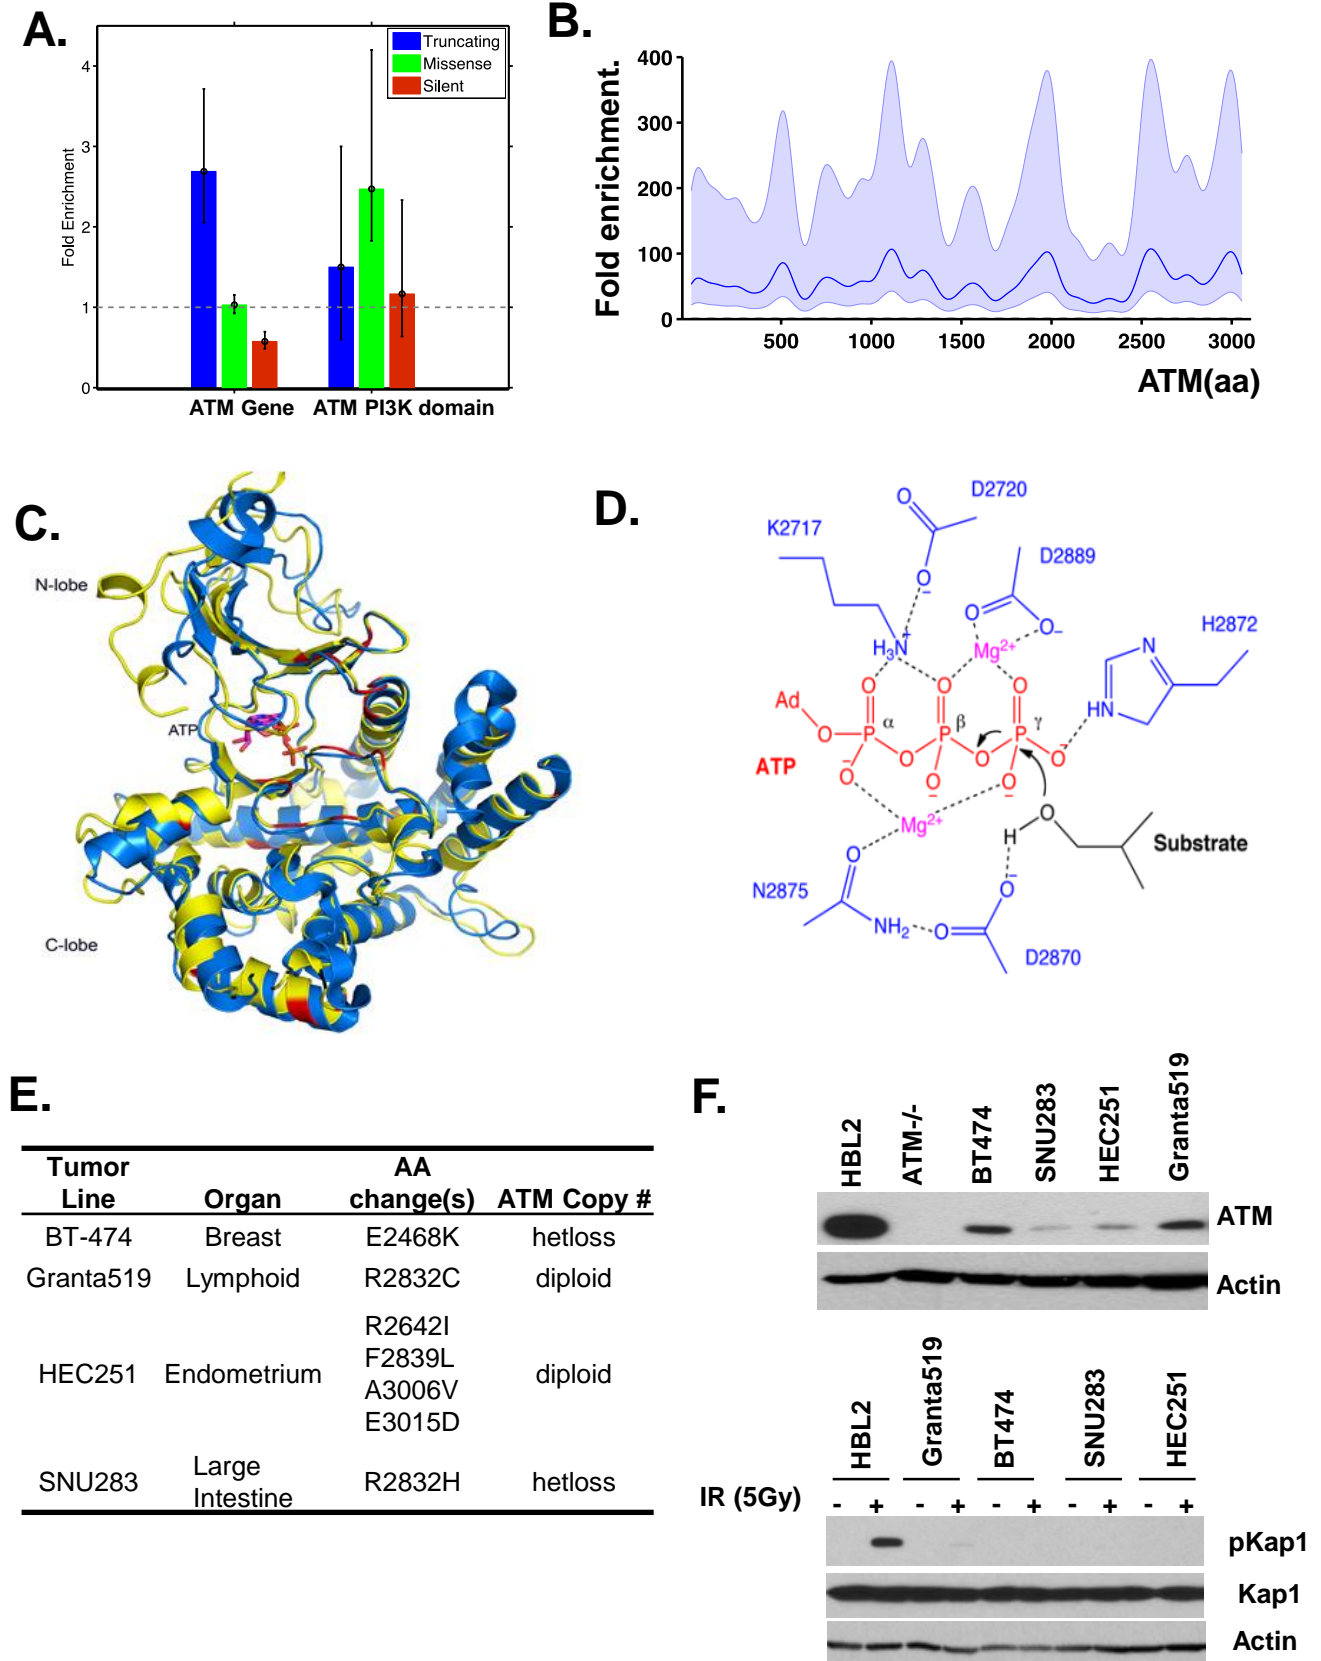

Supplement: supp [file elife-14709-supp-v1.zip]

# Figure 2-figure supplementary 2

**A.**

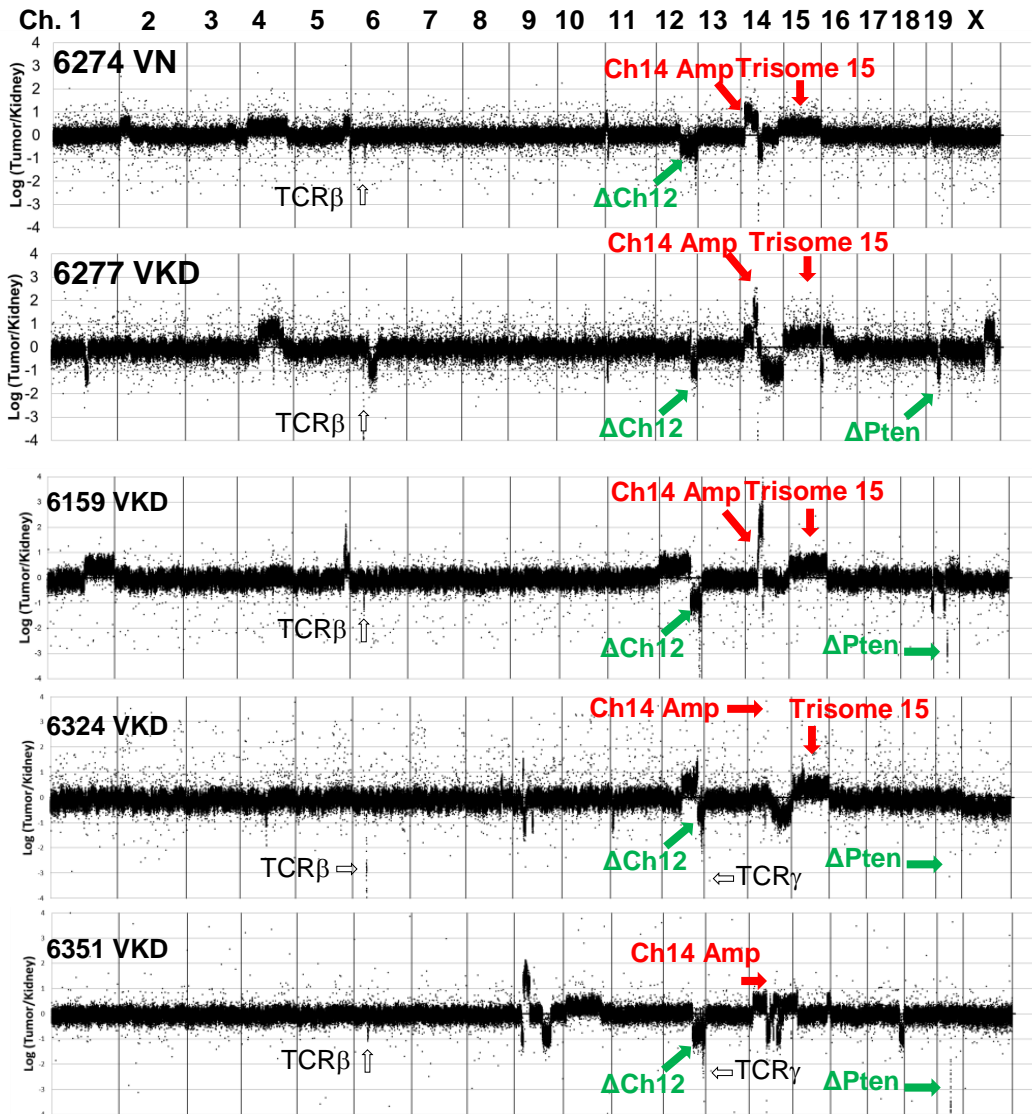

**B.**

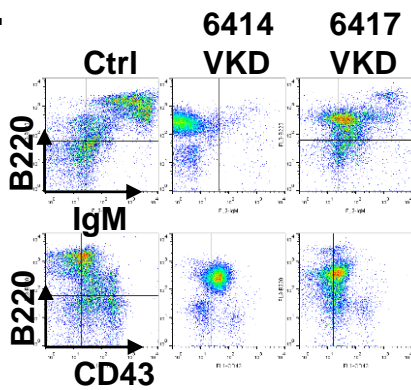

**C.**

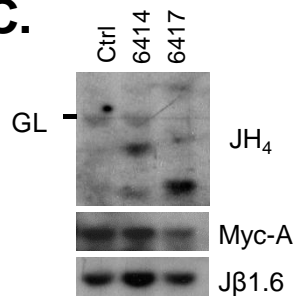

Supplement: supp [file elife-14709-supp-v1.zip]

# Figure 2-figure supplementary 1

**A.**

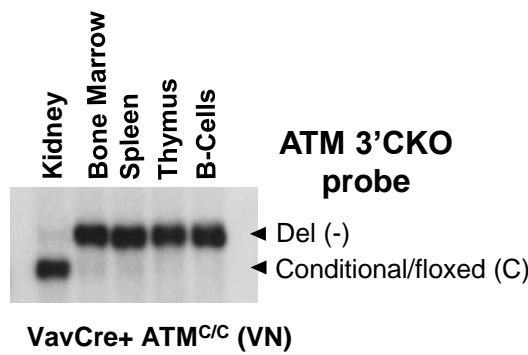

**C.**

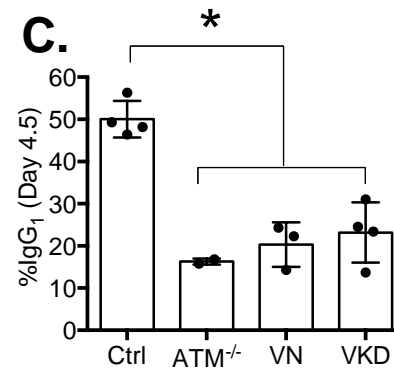

**B.**

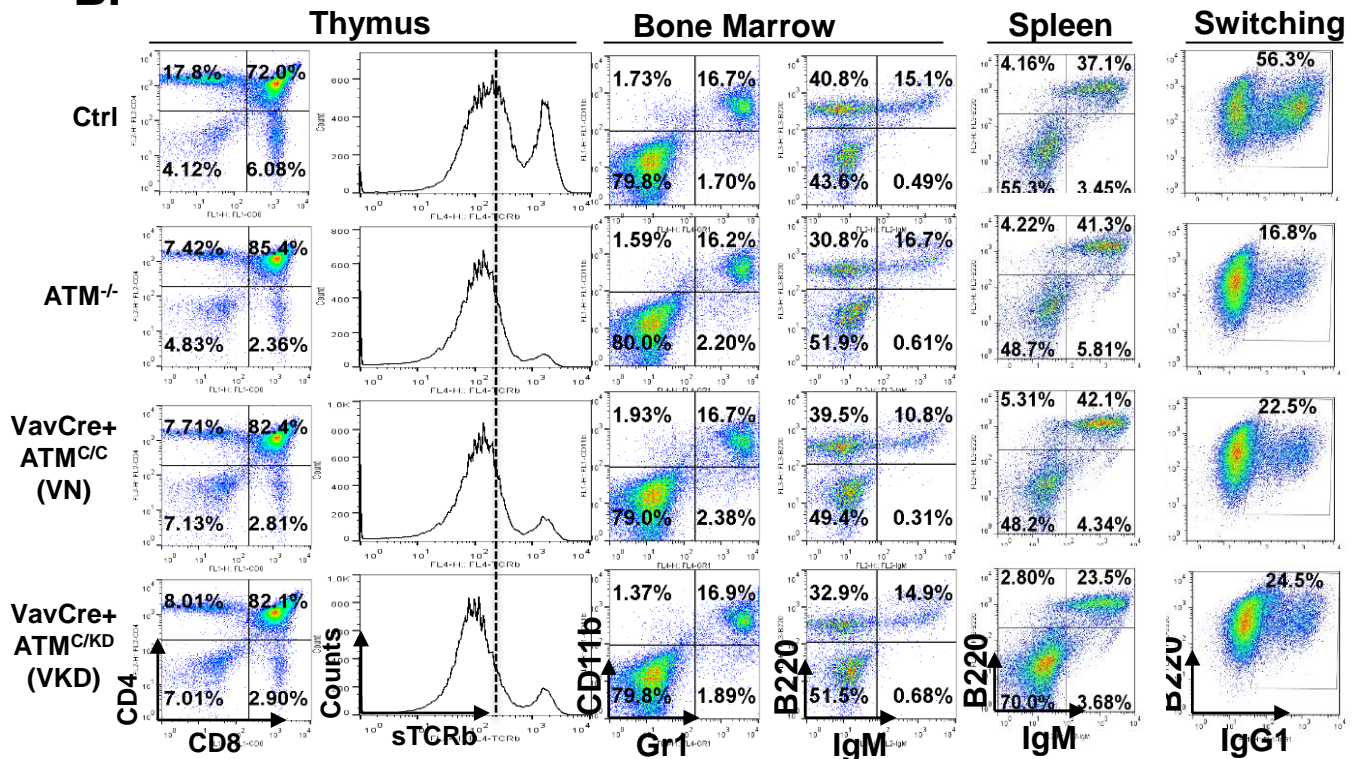

**D.**

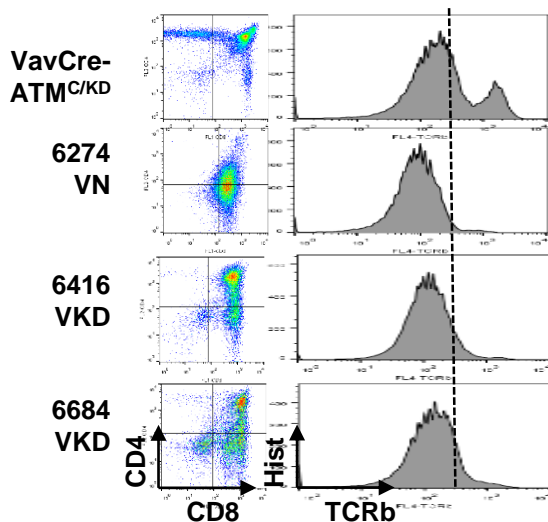

**E.**

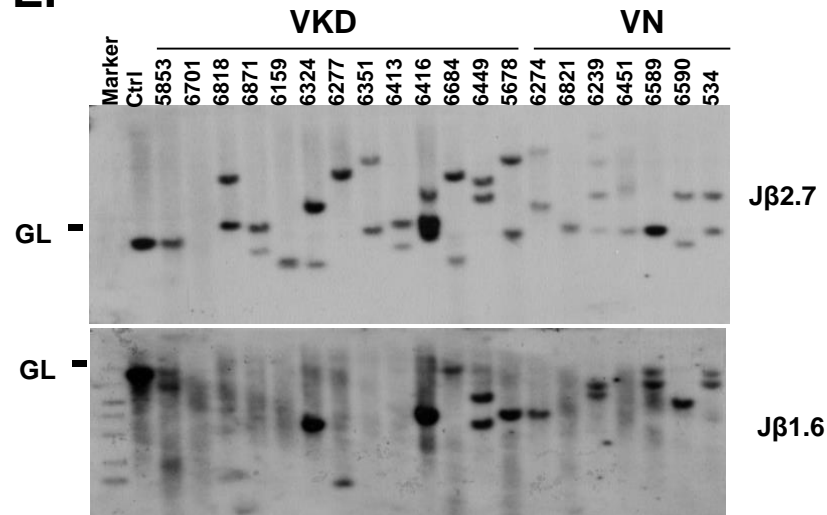

Supplement: supp [file elife-14709-supp-v1.zip]

# Figure 7-figure supplementary 1

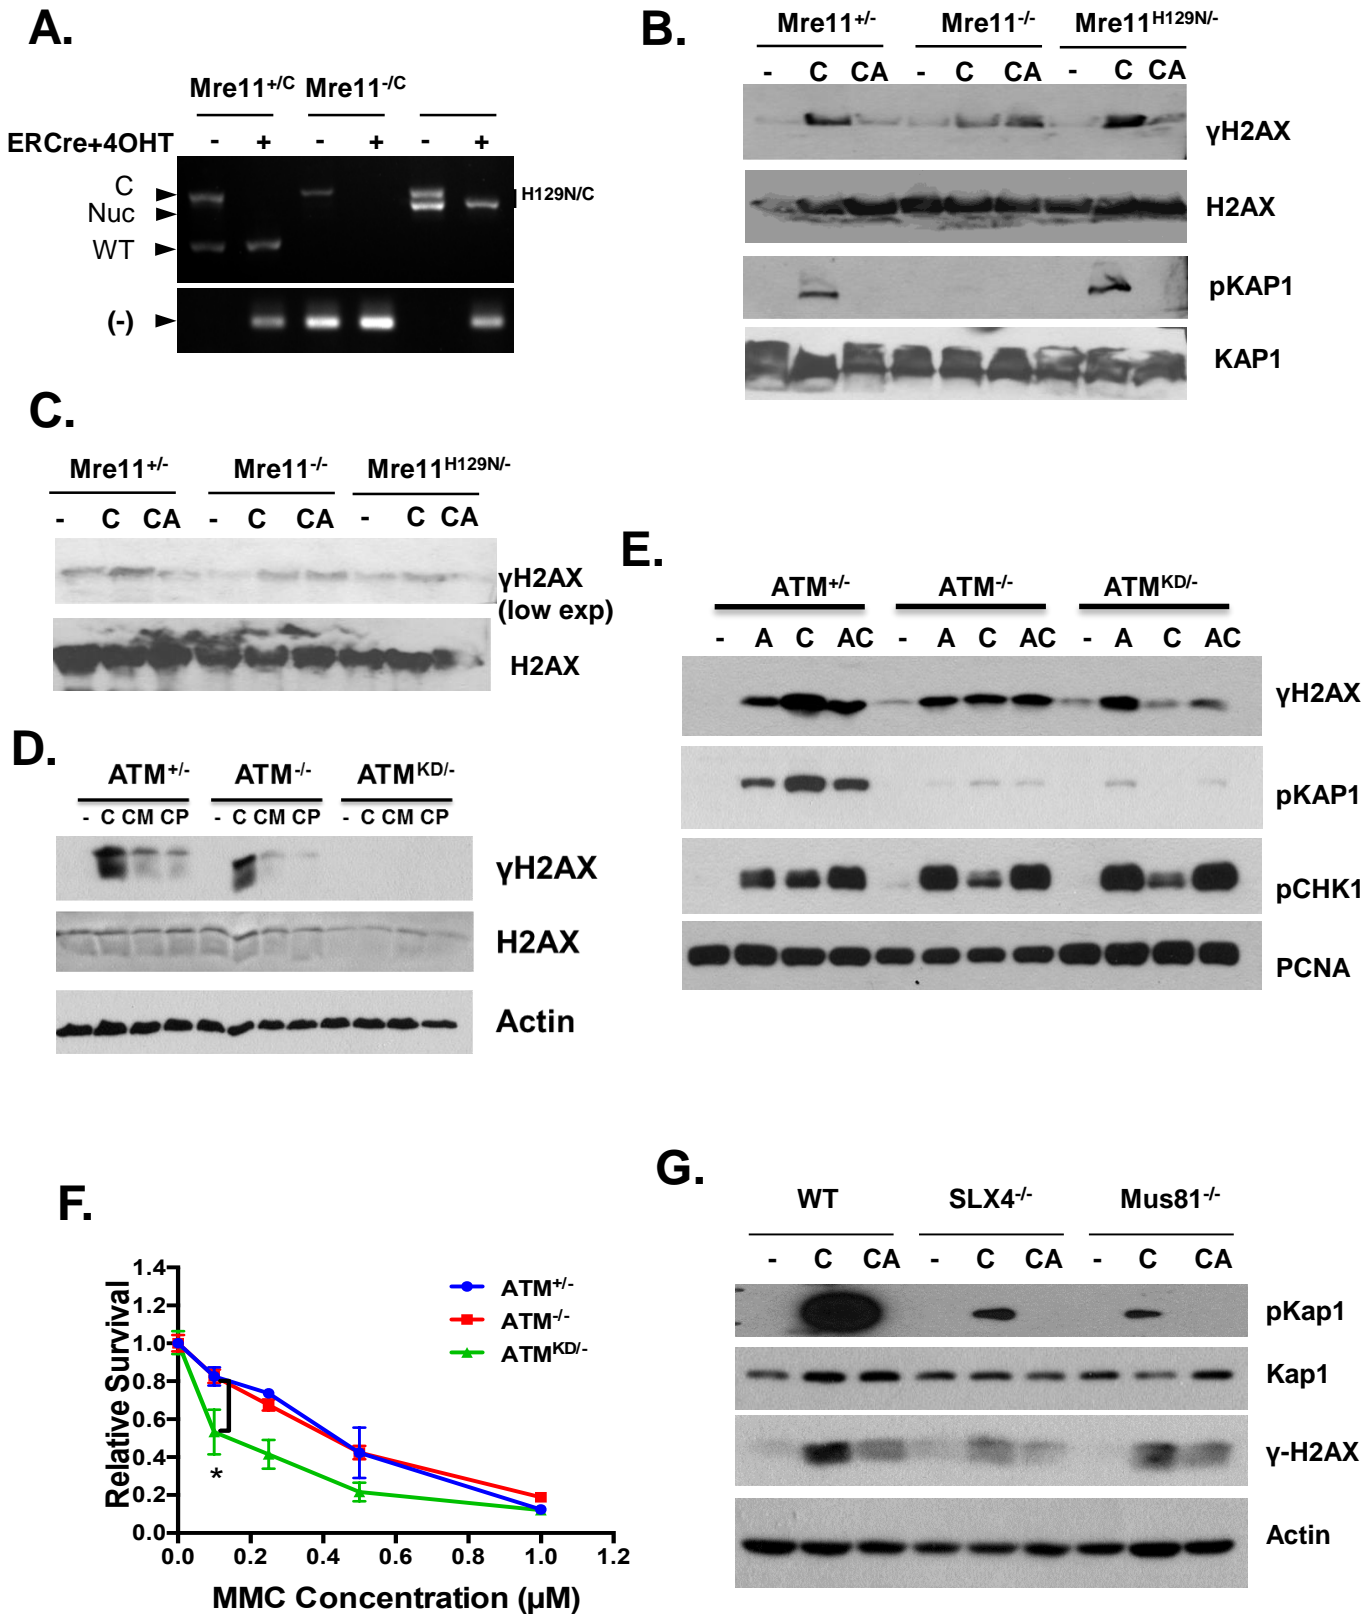

Supplement: supp [file elife-14709-supp-v1.zip]

# Figure 3-figure supplementary 1

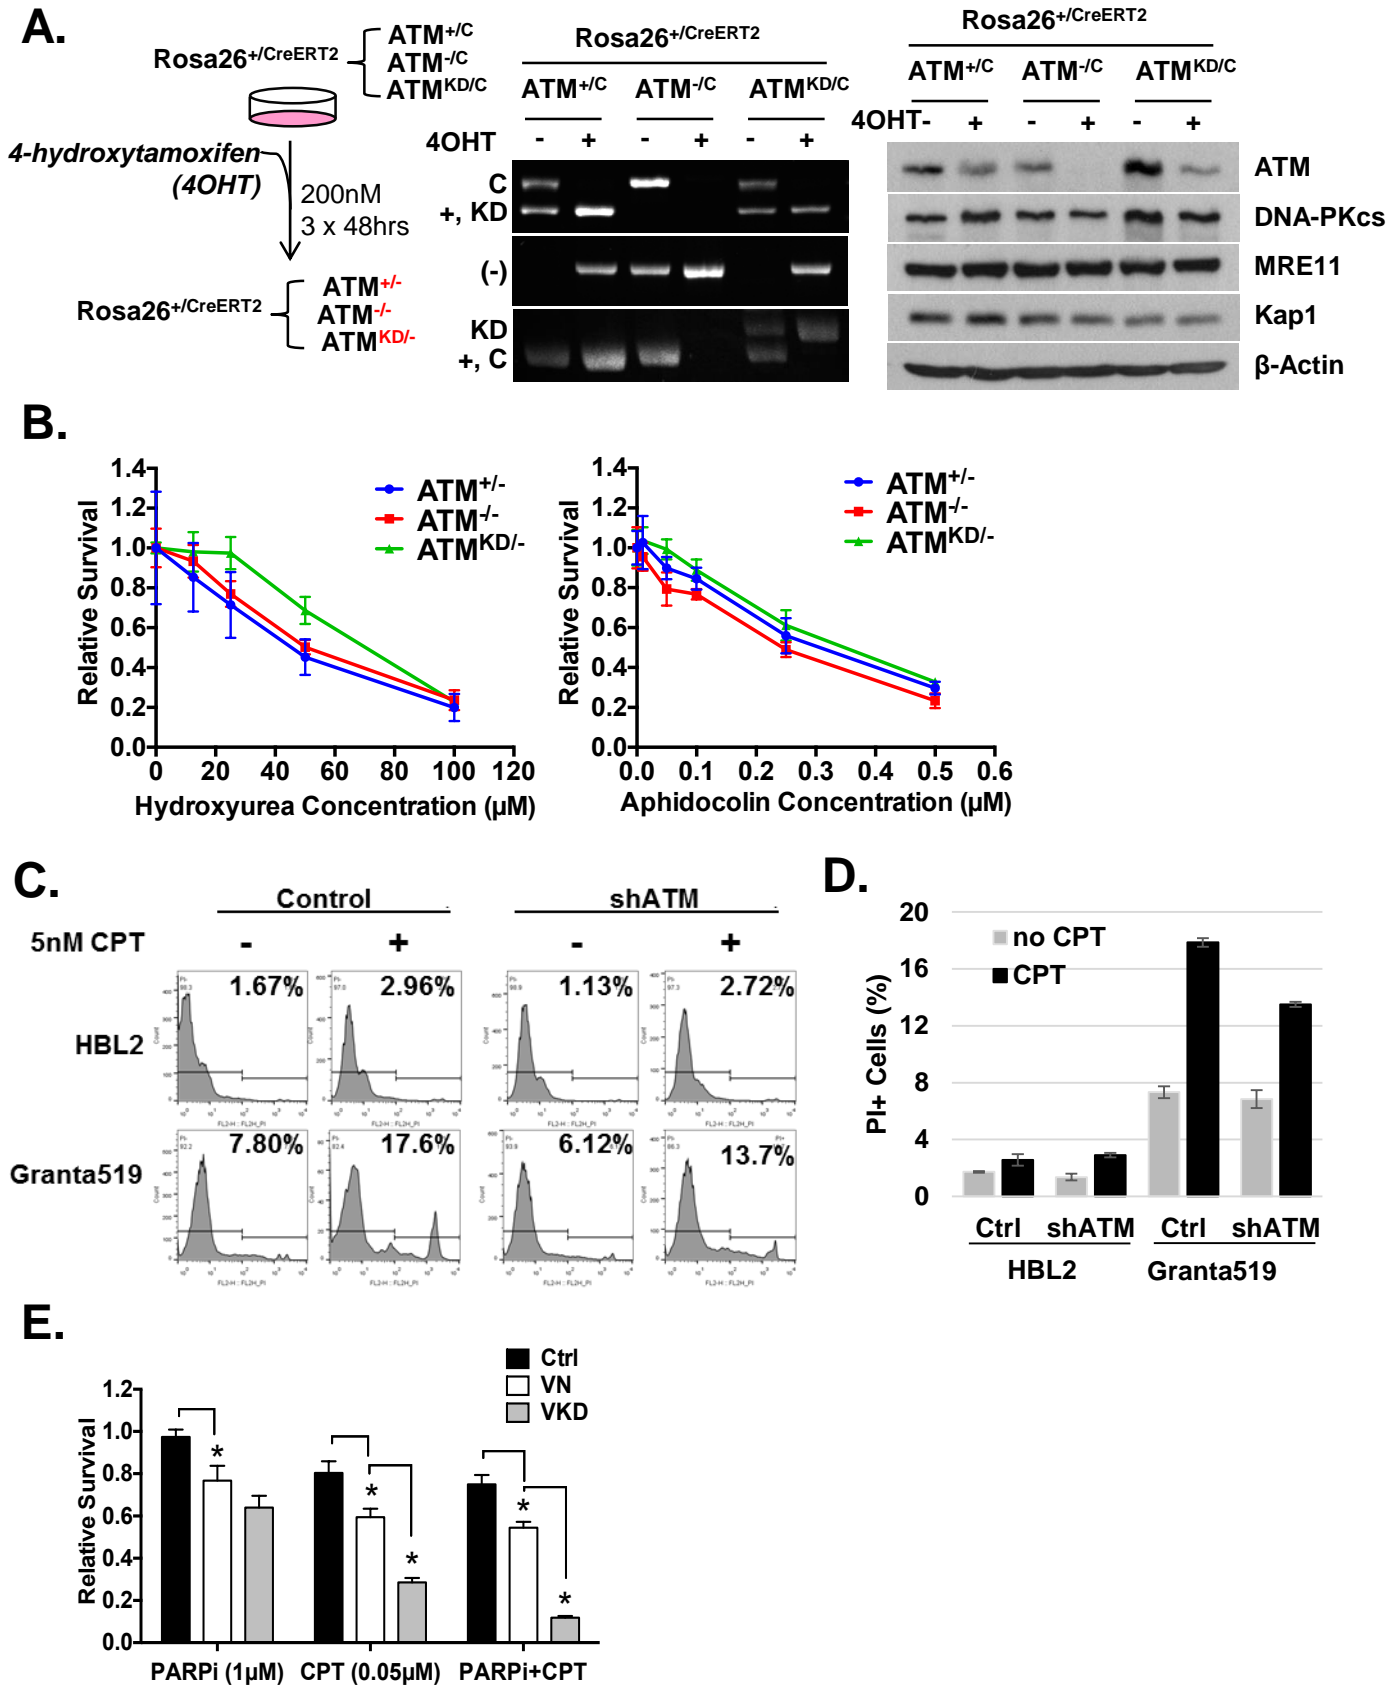

Supplement: supp [file elife-14709-supp-v1.zip]
